# Supplementary material for: Ion mobility calculations of flexible all-atom systems at arbitrary fields using two-temperature theory
Source: Royal Society of Chemistry journal article supplement (doi:10.1039/d3cp05415b), 2024-01-01
Supplement: d3cp05415b2.pdf [file d3cp05415b2.pdf]

**SUPPORTING INFORMATION**  
**FOR**

**Ion Mobility Calculations of Flexible All-Atom Systems at Arbitrary  
Fields Using Two-Temperature Theory.**

Farah Mubas-Sirah<sup>1,†</sup>, Viraj D. Gandhi<sup>1,2,†</sup>, Leyan Hua<sup>1</sup>, Mohsen Latif<sup>1</sup>, Amirreza Tootchi<sup>1</sup> and Carlos Larriba-Andaluz<sup>1,\*</sup>

<sup>1</sup> Department of Mechanical Engineering, IUPUI, Indianapolis

<sup>2</sup> Department of Mechanical Engineering, Purdue University, West Lafayette

<sup>†</sup> These authors contributed the same.

\* Corresponding author. Email: [clarriba@iupui.edu](mailto:clarriba@iupui.edu)

## Explanation of Ion Mobility Types A-D.

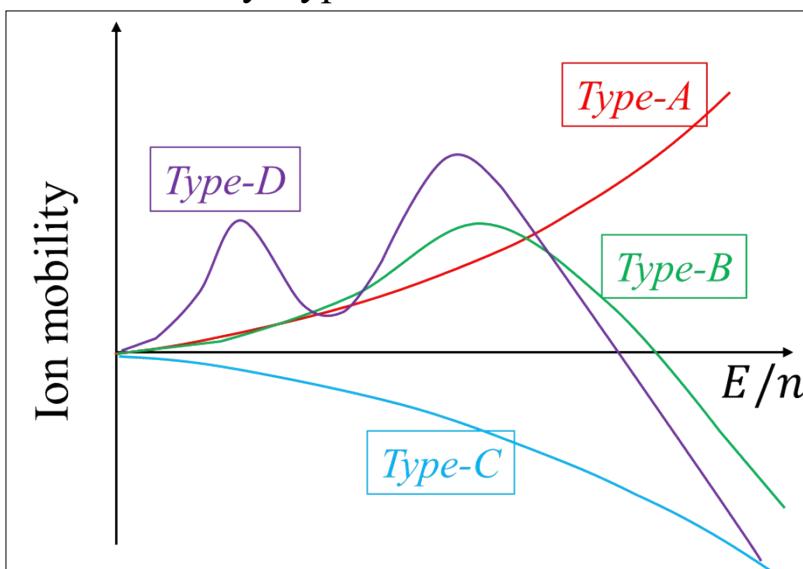

Figure S. 1: The plot illustrates the four distinct types of ion mobility as a function of electric field strength. Type-A mobility (red curve) shows a continuous increase with field strength, Type-B (green curve) demonstrates a peak before decreasing, Type-C (blue curve) represents a continuous decrease in mobility with increasing field strength, Type-D (purple curve) displays a complex behavior with multiple humps, reflecting intricate interactions between gas and ions. This supplementary figure aids in understanding the classification of ion mobility types mentioned in the manuscript. The figure is adapted from ref(1).

The ion mobility Vs  $E/n$  curve can be explained by a complex interplay of increasing collision energy (which reduces mobility) and diminishing capture effect of interatomic interactions (which increases mobility) as the field increases.

**Type A mobility:** At room temperature and low fields, the ion-induced dipole potential ( $r^{-4}$ ) dominates the mobility behavior, particularly in small ions. As the relative velocity between ion and gas increases by increasing field, the “capture” effect of the ion-induced dipole interaction decreases which decreases the overall momentum transfer thus increasing the mobility.

**Type B mobility:** This is characterized by a singular distinctive peak in the mobility Vs  $E/n$  curve. At lower fields, Type B ions behave similarly to Type A, with mobility increasing due to diminishing capture effects of ion-induced dipole potential. However, as the electric field continues to increase, the ion reaches a point where the capture effect cannot diminish further. At this point, the mobility is dominated by the increased collision energy, which increases the drag on the ion leading to a reduction in mobility. It is shown in ref(2) that with given enough  $E/n$  range, all Type-A ion converts into Type-B ion.

**Type C mobility:** The mobility of these ions continuously decreases with increasing mobility. This behavior stems from the larger physical size of the ions, which inherently lacks the effects of the ion-induced dipole interaction. As the electric field is increased, these larger ions experience an increase in collision energy, leading to a continuous decrease in mobility.

**Type D mobility:** This behavior is only observed at cryogenic temperatures where the dispersion force component of the intermolecular forces, known by the  $r^{-6}$  component of the Lennard-Jones potential also moderately contributes to capture of gas along with  $r^{-4}$  potential at low field, an effect that is negligible at 300K, as demonstrated in ref(1). However, at cryogenic temperatures, the effect is observable. Here, as the relative velocity between ion and gas increases by increasing the field, the capture effect of the dispersion

force decreases, increasing mobility, consequently giving rise to the first peak. Subsequently, the collision energy increases with the field, decreasing the mobility until the  $r^{-4}$  potential influence decreases, giving rise to the second peak. The mobility peaks before being overtaken by hard sphere momentum transfer interactions, which lead to a subsequent continuous decrease in mobility.

The following sections contain the IMoS file results. In them, one can find the coordinates of the salts used, the mobility calculations for the two-temperature theory and the combined dispersion plots. It also includes the IMoS 1.13 Manual.

## Independent Results for Three Structures of TDDA Salt:

IMoS v1.13 RESULTS FILE

File: TAA\_multiTemperature\_candidate2.xlsx Molecule: TDDA\_295\_27.txt

Number of atoms: 149  
Molecular Weight: 690.00 Da  
Total Charge: 1

The TM Method used is High Field  
Performing TMLJ calculations for: TAA\_multiTemperature\_candidate2.xlsx and molecule TDDA\_295\_27.txt.

### Results

Summary of ion calculations:  
Ko represents reduced mobility!

| Ion                     | Teff<br>(K) | CCS<br>(A2) | E/n1<br>(Td) | E/n2<br>(Td) | E/n3<br>(Td) | E/n4<br>(Td) | <Ko1><br>(cm2/Vs) | <Ko2><br>(cm2/Vs) | <Ko3><br>(cm2/Vs) | <Ko4><br>(cm2/Vs) |        |
|-------------------------|-------------|-------------|--------------|--------------|--------------|--------------|-------------------|-------------------|-------------------|-------------------|--------|
| TDDA_295_27.txt 295.00  | 295.00      | 312.0779    | 0.0000       | 0.0000       | 0.0000       | 0.0000       | 0.0000            | 0.6657            | 0.6657            | 0.6657            | 0.6657 |
| TDDA_295_27.txt 296.00  | 296.00      | 311.6951    | 16.6949      | 16.6897      | 16.6897      | 16.6897      | 16.6897           | 0.6654            | 0.6656            | 0.6656            | 0.6656 |
| TDDA_295_27.txt 297.00  | 297.00      | 311.4237    | 23.6294      | 23.6156      | 23.6155      | 23.6155      | 23.6155           | 0.6649            | 0.6653            | 0.6653            | 0.6653 |
| TDDA_295_27.txt 298.50  | 298.50      | 311.0390    | 31.2988      | 31.2676      | 31.2675      | 31.2675      | 31.2675           | 0.6640            | 0.6647            | 0.6647            | 0.6647 |
| TDDA_295_27.txt 300.00  | 300.00      | 310.6650    | 37.4580      | 37.4054      | 37.4051      | 37.4051      | 37.4051           | 0.6631            | 0.6641            | 0.6641            | 0.6641 |
| TDDA_295_27.txt 302.00  | 302.00      | 310.1155    | 44.3898      | 44.3035      | 44.3028      | 44.3028      | 44.3028           | 0.6621            | 0.6635            | 0.6635            | 0.6635 |
| TDDA_295_27.txt 305.00  | 305.00      | 309.1217    | 53.1480      | 53.0018      | 53.0002      | 53.0001      | 53.0001           | 0.6610            | 0.6629            | 0.6629            | 0.6629 |
| TDDA_295_27.txt 308.00  | 308.00      | 308.3246    | 60.7383      | 60.5236      | 60.5207      | 60.5204      | 60.5204           | 0.6594            | 0.6619            | 0.6619            | 0.6619 |
| TDDA_295_27.txt 312.00  | 312.00      | 307.2923    | 69.6724      | 69.3545      | 69.3491      | 69.3484      | 69.3484           | 0.6574            | 0.6606            | 0.6606            | 0.6606 |
| TDDA_295_27.txt 315.00  | 315.00      | 306.5770    | 75.7560      | 75.3537      | 75.3458      | 75.3448      | 75.3448           | 0.6558            | 0.6595            | 0.6595            | 0.6595 |
| TDDA_295_27.txt 320.00  | 320.00      | 305.3593    | 85.0283      | 84.4729      | 84.4597      | 84.4579      | 84.4579           | 0.6532            | 0.6578            | 0.6578            | 0.6578 |
| TDDA_295_27.txt 325.00  | 325.00      | 304.1019    | 93.4822      | 92.7596      | 92.7395      | 92.7366      | 92.7366           | 0.6509            | 0.6563            | 0.6563            | 0.6563 |
| TDDA_295_27.txt 330.00  | 330.00      | 302.7850    | 101.3054     | 100.4019     | 100.3732     | 100.3688     | 100.3688          | 0.6487            | 0.6550            | 0.6550            | 0.6551 |
| TDDA_295_27.txt 340.00  | 340.00      | 300.5196    | 115.7246     | 114.4338     | 114.3836     | 114.3751     | 114.3751          | 0.6439            | 0.6518            | 0.6520            | 0.6519 |
| TDDA_295_27.txt 350.00  | 350.00      | 298.3634    | 128.8748     | 127.1631     | 127.0857     | 127.0713     | 127.0713          | 0.6393            | 0.6486            | 0.6489            | 0.6488 |
| TDDA_295_27.txt 365.00  | 365.00      | 295.1132    | 146.8559     | 144.4541     | 144.3240     | 144.2974     | 144.2974          | 0.6329            | 0.6444            | 0.6449            | 0.6447 |
| TDDA_295_27.txt 380.00  | 380.00      | 292.0231    | 163.3901     | 160.2389     | 160.0426     | 159.9992     | 159.9992          | 0.6268            | 0.6404            | 0.6412            | 0.6409 |
| TDDA_295_27.txt 420.00  | 420.00      | 284.7625    | 203.1280     | 197.7798     | 197.3500     | 197.2399     | 197.2399          | 0.6114            | 0.6298            | 0.6314            | 0.6309 |
| TDDA_295_27.txt 470.00  | 470.00      | 277.3159    | 247.5996     | 239.2132     | 238.3907     | 238.1541     | 238.1541          | 0.5935            | 0.6170            | 0.6196            | 0.6190 |
| TDDA_295_27.txt 530.00  | 530.00      | 269.8743    | 296.5109     | 284.1489     | 282.7231     | 282.2732     | 282.2732          | 0.5743            | 0.6029            | 0.6068            | 0.6062 |
| TDDA_295_27.txt 600.00  | 600.00      | 262.6642    | 349.8112     | 332.5064     | 330.2322     | 329.4601     | 329.4601          | 0.5546            | 0.5879            | 0.5934            | 0.5930 |
| TDDA_295_27.txt 680.00  | 680.00      | 256.1431    | 408.0136     | 384.7830     | 381.3804     | 380.1548     | 380.1548          | 0.5342            | 0.5718            | 0.5790            | 0.5788 |
| TDDA_295_27.txt 770.00  | 770.00      | 250.3786    | 471.4077     | 441.3203     | 436.5107     | 434.6938     | 434.6938          | 0.5136            | 0.5546            | 0.5635            | 0.5638 |
| TDDA_295_27.txt 870.00  | 870.00      | 245.1286    | 539.7528     | 501.8632     | 495.3576     | 492.8011     | 492.8011          | 0.4935            | 0.5374            | 0.5479            | 0.5487 |
| TDDA_295_27.txt 980.00  | 980.00      | 240.4185    | 613.2442     | 566.6109     | 558.1067     | 554.6532     | 554.6532          | 0.4741            | 0.5203            | 0.5323            | 0.5337 |
| TDDA_295_27.txt 1100.00 | 1100.00     | 236.3535    | 692.4105     | 636.2268     | 625.4757     | 620.9927     | 620.9927          | 0.4552            | 0.5030            | 0.5163            | 0.5183 |

### Dispersion plot

alpha is obtained by dividing Mobility by zero field Mobility (not reduced)

| Ion                      | Ed<br>(Td) | Ec<br>(Td) | alpha<br>(Td) | E/n<br>(Td) |
|--------------------------|------------|------------|---------------|-------------|
| TDDA_295_27.txt 0.0000   | 0.0000     | 0.0000     | 0.0000        | 0.0000      |
| TDDA_295_27.txt 16.6897  | 0.0006     | -0.0002    | 16.6897       |             |
| TDDA_295_27.txt 23.6155  | 0.0023     | -0.0007    | 23.6155       |             |
| TDDA_295_27.txt 31.2675  | 0.0062     | -0.0015    | 31.2675       |             |
| TDDA_295_27.txt 37.4051  | 0.0112     | -0.0024    | 37.4051       |             |
| TDDA_295_27.txt 44.3028  | 0.0187     | -0.0034    | 44.3028       |             |
| TDDA_295_27.txt 53.0001  | 0.0282     | -0.0043    | 53.0001       |             |
| TDDA_295_27.txt 60.5204  | 0.0399     | -0.0057    | 60.5204       |             |
| TDDA_295_27.txt 69.3484  | 0.0592     | -0.0077    | 69.3484       |             |
| TDDA_295_27.txt 75.3448  | 0.0762     | -0.0093    | 75.3448       |             |
| TDDA_295_27.txt 84.4579  | 0.1082     | -0.0118    | 84.4579       |             |
| TDDA_295_27.txt 92.7366  | 0.1437     | -0.0141    | 92.7366       |             |
| TDDA_295_27.txt 100.3688 | 0.1812     | -0.0160    | 100.3688      |             |
| TDDA_295_27.txt 114.3751 | 0.2695     | -0.0208    | 114.3751      |             |
| TDDA_295_27.txt 127.0713 | 0.3691     | -0.0254    | 127.0713      |             |
| TDDA_295_27.txt 144.2974 | 0.5271     | -0.0316    | 144.2974      |             |
| TDDA_295_27.txt 159.9992 | 0.6903     | -0.0373    | 159.9992      |             |

TDDA\_295\_27.txt 197.2399 1.1838 -0.0522 197.2399  
 TDDA\_295\_27.txt 238.1541 1.9212 -0.0701 238.1541  
 TDDA\_295\_27.txt 282.2732 2.9140 -0.0894 282.2732  
 TDDA\_295\_27.txt 329.4601 4.1980 -0.1093 329.4601  
 TDDA\_295\_27.txt 380.1548 5.8279 -0.1306 380.1548  
 TDDA\_295\_27.txt 434.6938 7.8729 -0.1531 434.6938  
 TDDA\_295\_27.txt 492.8011 10.3182 -0.1758 492.8011  
 TDDA\_295\_27.txt 554.6532 13.1899 -0.1983 554.6532  
 TDDA\_295\_27.txt 620.9927 16.6185 -0.2215 620.9927

LJTM calculation parameters:

-----  
 Number of loops (itn) = 1  
 Number of velocity points (inp) = 5  
 Number of random rotations and impact parameters (imp) = 180000  
 Total Trajectories = 900000

Max time step = 1.00e-13 second  
 Min time step = 1.00e-16 second  
 Time step corrector = 100.00

Ratio of potential energy to kinetic energy at the starting of Traj (sw1) = 0.001000  
 Maximum value of [1-cosX] at b\_max (cmin) = 0.000100  
 Seed = 13  
 Time taken is a mere 620.5757 seconds

File: TAA\_multiTemperature\_candidate2.xlsx      Molecule: TDDA\_390\_25.txt

Number of atoms: 149  
 Molecular Weight: 690.00 Da  
 Total Charge: 1

The TM Method used is High Field  
 Performing TMLJ calculations for: TAA\_multiTemperature\_candidate2.xlsx and molecule TDDA\_390\_25.txt.

Results

-----  
 Summary of ion calculations:

Ko represents reduced mobility!

| Ion                     | Teff<br>(K) | CCS<br>(A2) | E/n1<br>(Td) | E/n2<br>(Td) | E/n3<br>(Td) | E/n4<br>(Td) | <Ko1><br>(cm2/Vs) | <Ko2><br>(cm2/Vs) | <Ko3><br>(cm2/Vs) | <Ko4><br>(cm2/Vs) |        |
|-------------------------|-------------|-------------|--------------|--------------|--------------|--------------|-------------------|-------------------|-------------------|-------------------|--------|
| TDDA_390_25.txt 295.00  | 318.8685    | 0.0000      | 0.0000       | 0.0000       | 0.0000       | 0.0000       | 0.0000            | 0.6515            | 0.6515            | 0.6515            | 0.6515 |
| TDDA_390_25.txt 296.00  | 318.5872    | 17.0640     | 17.0587      | 17.0587      | 17.0587      | 17.0587      | 17.0587           | 0.6510            | 0.6512            | 0.6512            | 0.6512 |
| TDDA_390_25.txt 297.00  | 318.3619    | 24.1558     | 24.1415      | 24.1415      | 24.1415      | 24.1415      | 24.1415           | 0.6504            | 0.6508            | 0.6508            | 0.6508 |
| TDDA_390_25.txt 298.50  | 317.9453    | 31.9938     | 31.9615      | 31.9615      | 31.9615      | 31.9615      | 31.9615           | 0.6496            | 0.6503            | 0.6503            | 0.6503 |
| TDDA_390_25.txt 300.00  | 317.4760    | 38.2793     | 38.2248      | 38.2248      | 38.2248      | 38.2248      | 38.2248           | 0.6489            | 0.6499            | 0.6499            | 0.6499 |
| TDDA_390_25.txt 302.00  | 316.8498    | 45.3538     | 45.2644      | 45.2637      | 45.2637      | 45.2637      | 45.2637           | 0.6480            | 0.6494            | 0.6494            | 0.6494 |
| TDDA_390_25.txt 305.00  | 315.9245    | 54.3176     | 54.1662      | 54.1646      | 54.1646      | 54.1646      | 54.1646           | 0.6467            | 0.6486            | 0.6486            | 0.6486 |
| TDDA_390_25.txt 308.00  | 315.1493    | 62.0827     | 61.8602      | 61.8574      | 61.8574      | 61.8574      | 61.8574           | 0.6452            | 0.6476            | 0.6476            | 0.6476 |
| TDDA_390_25.txt 312.00  | 313.9666    | 71.1856     | 70.8557      | 70.8503      | 70.8503      | 70.8503      | 70.8503           | 0.6434            | 0.6466            | 0.6466            | 0.6466 |
| TDDA_390_25.txt 315.00  | 313.1509    | 77.3804     | 76.9622      | 76.9541      | 76.9541      | 76.9541      | 76.9541           | 0.6420            | 0.6457            | 0.6458            | 0.6457 |
| TDDA_390_25.txt 320.00  | 311.7680    | 86.8128     | 86.2347      | 86.2211      | 86.2211      | 86.2211      | 86.2211           | 0.6398            | 0.6444            | 0.6444            | 0.6444 |
| TDDA_390_25.txt 325.00  | 310.7306    | 95.5198     | 94.7696      | 94.7491      | 94.7491      | 94.7491      | 94.7491           | 0.6370            | 0.6424            | 0.6425            | 0.6424 |
| TDDA_390_25.txt 330.00  | 309.4283    | 103.5281    | 102.5907     | 102.5615     | 102.5615     | 102.5615     | 102.5615          | 0.6348            | 0.6410            | 0.6412            | 0.6411 |
| TDDA_390_25.txt 340.00  | 307.0109    | 118.2243    | 116.8823     | 116.8311     | 116.8311     | 116.8311     | 116.8311          | 0.6303            | 0.6381            | 0.6384            | 0.6382 |
| TDDA_390_25.txt 350.00  | 304.6815    | 131.6039    | 129.8191     | 129.7394     | 129.7394     | 129.7394     | 129.7394          | 0.6260            | 0.6353            | 0.6357            | 0.6355 |
| TDDA_390_25.txt 365.00  | 301.3851    | 149.9770    | 147.4703     | 147.3361     | 147.3361     | 147.3361     | 147.3361          | 0.6197            | 0.6312            | 0.6318            | 0.6315 |
| TDDA_390_25.txt 380.00  | 298.3437    | 166.9266    | 163.6433     | 163.4413     | 163.4413     | 163.4413     | 163.4413          | 0.6136            | 0.6270            | 0.6278            | 0.6276 |
| TDDA_390_25.txt 420.00  | 290.9305    | 207.5277    | 201.9456     | 201.5008     | 201.5008     | 201.5008     | 201.5008          | 0.5985            | 0.6169            | 0.6184            | 0.6180 |
| TDDA_390_25.txt 470.00  | 283.2816    | 252.9260    | 244.1529     | 243.2968     | 243.2968     | 243.2968     | 243.2968          | 0.5810            | 0.6045            | 0.6071            | 0.6066 |
| TDDA_390_25.txt 530.00  | 275.9434    | 303.1791    | 290.2833     | 288.8077     | 288.8077     | 288.8077     | 288.8077          | 0.5617            | 0.5901            | 0.5941            | 0.5935 |
| TDDA_390_25.txt 600.00  | 268.8544    | 358.0552    | 339.9953     | 337.6300     | 337.6300     | 337.6300     | 337.6300          | 0.5418            | 0.5750            | 0.5805            | 0.5800 |
| TDDA_390_25.txt 680.00  | 262.3262    | 417.8629    | 393.6379     | 390.0951     | 390.0951     | 390.0951     | 390.0951          | 0.5216            | 0.5589            | 0.5661            | 0.5660 |
| TDDA_390_25.txt 770.00  | 256.3943    | 482.7339    | 451.3467     | 446.3275     | 446.3275     | 446.3275     | 446.3275          | 0.5015            | 0.5423            | 0.5512            | 0.5515 |
| TDDA_390_25.txt 870.00  | 251.1495    | 553.0102    | 513.4997     | 506.6939     | 506.6939     | 506.6939     | 506.6939          | 0.4817            | 0.5253            | 0.5358            | 0.5366 |
| TDDA_390_25.txt 980.00  | 246.4533    | 628.6375    | 580.0780     | 571.1983     | 571.1983     | 571.1983     | 571.1983          | 0.4625            | 0.5083            | 0.5202            | 0.5216 |
| TDDA_390_25.txt 1100.00 | 242.2431    | 709.6643    | 651.1015     | 639.8275     | 639.8275     | 639.8275     | 639.8275          | 0.4441            | 0.4916            | 0.5048            | 0.5069 |

Dispersion plot

alpha is obtained by dividing Mobility by zero field Mobility (not reduced)

| Ion                     | Ed<br>(Td) | Ec<br>(Td) | alpha<br>(Td) | E/n<br>(Td) |
|-------------------------|------------|------------|---------------|-------------|
| TDDA_390_25.txt 0.0000  | 0.0000     | 0.0000     | 0.0000        | 0.0000      |
| TDDA_390_25.txt 17.0587 | 0.0013     | -0.0005    | 17.0587       |             |
| TDDA_390_25.txt 24.1415 | 0.0038     | -0.0012    | 24.1415       |             |

|                 |          |         |         |          |
|-----------------|----------|---------|---------|----------|
| TDDA_390_25.txt | 31.9614  | 0.0078  | -0.0020 | 31.9614  |
| TDDA_390_25.txt | 38.2245  | 0.0116  | -0.0025 | 38.2245  |
| TDDA_390_25.txt | 45.2637  | 0.0168  | -0.0033 | 45.2637  |
| TDDA_390_25.txt | 54.1645  | 0.0254  | -0.0045 | 54.1645  |
| TDDA_390_25.txt | 61.8570  | 0.0380  | -0.0060 | 61.8570  |
| TDDA_390_25.txt | 70.8496  | 0.0563  | -0.0076 | 70.8496  |
| TDDA_390_25.txt | 76.9531  | 0.0723  | -0.0089 | 76.9531  |
| TDDA_390_25.txt | 86.2193  | 0.1012  | -0.0110 | 86.2193  |
| TDDA_390_25.txt | 94.7461  | 0.1408  | -0.0140 | 94.7461  |
| TDDA_390_25.txt | 102.5569 | 0.1817  | -0.0160 | 102.5569 |
| TDDA_390_25.txt | 116.8223 | 0.2676  | -0.0204 | 116.8223 |
| TDDA_390_25.txt | 129.7244 | 0.3607  | -0.0246 | 129.7244 |
| TDDA_390_25.txt | 147.3084 | 0.5179  | -0.0307 | 147.3084 |
| TDDA_390_25.txt | 163.3963 | 0.6920  | -0.0368 | 163.3963 |
| TDDA_390_25.txt | 201.3859 | 1.1941  | -0.0515 | 201.3859 |
| TDDA_390_25.txt | 243.0487 | 1.9320  | -0.0690 | 243.0487 |
| TDDA_390_25.txt | 288.3405 | 2.9706  | -0.0891 | 288.3405 |
| TDDA_390_25.txt | 336.8258 | 4.3243  | -0.1097 | 336.8258 |
| TDDA_390_25.txt | 388.8187 | 6.0307  | -0.1314 | 388.8187 |
| TDDA_390_25.txt | 444.4310 | 8.1383  | -0.1536 | 444.4310 |
| TDDA_390_25.txt | 504.0182 | 10.6853 | -0.1764 | 504.0182 |
| TDDA_390_25.txt | 567.5907 | 13.6884 | -0.1994 | 567.5907 |
| TDDA_390_25.txt | 635.1169 | 17.1513 | -0.2221 | 635.1169 |

#### LJTM calculation parameters:

Number of loops (itn) = 1  
 Number of velocity points (inp) = 5  
 Number of random rotations and impact parameters (imp) = 180000  
 Total Trajectories = 900000

Max time step = 1.00e-13 second  
 Min time step = 1.00e-16 second  
 Time step corrector = 100.00

Ratio of potential energy to kinetic energy at the starting of Traj (sw1) = 0.001000  
 Maximum value of [1-cosX] at b\_max (emin) = 0.000100  
 Seed = 13  
 Time taken is a mere 639.9028 seconds

File: TAA\_multiTemperature\_candidate2.xlsx      Molecule: TDDA\_480\_18.txt

Number of atoms: 149  
 Molecular Weight: 690.00 Da  
 Total Charge: 1

The TM Method used is High Field  
 Performing TMLJ calculations for: TAA\_multiTemperature\_candidate2.xlsx and molecule TDDA\_480\_18.txt.

#### Results

##### Summary of ion calculations:

Ko represents reduced mobility!

| Ion             | Teff<br>(K) | CCS<br>(A2) | E/n1<br>(Td) | E/n2<br>(Td) | E/n3<br>(Td) | E/n4<br>(Td) | <Ko1><br>(cm2/Vs) | <Ko2><br>(cm2/Vs) | <Ko3><br>(cm2/Vs) | <Ko4><br>(cm2/Vs) |        |
|-----------------|-------------|-------------|--------------|--------------|--------------|--------------|-------------------|-------------------|-------------------|-------------------|--------|
| TDDA_480_18.txt | 295.00      | 333.5457    | 0.0000       | 0.0000       | 0.0000       | 0.0000       | 0.0000            | 0.6229            | 0.6229            | 0.6229            | 0.6229 |
| TDDA_480_18.txt | 296.00      | 333.1468    | 17.8439      | 17.8383      | 17.8382      | 17.8382      | 17.8382           | 0.6226            | 0.6228            | 0.6228            | 0.6228 |
| TDDA_480_18.txt | 297.00      | 332.9022    | 25.2591      | 25.2439      | 25.2439      | 25.2439      | 25.2439           | 0.6220            | 0.6223            | 0.6223            | 0.6223 |
| TDDA_480_18.txt | 298.50      | 332.3186    | 33.4401      | 33.4059      | 33.4058      | 33.4058      | 33.4058           | 0.6215            | 0.6221            | 0.6221            | 0.6221 |
| TDDA_480_18.txt | 300.00      | 331.8359    | 40.0107      | 39.9529      | 39.9526      | 39.9526      | 39.9526           | 0.6208            | 0.6218            | 0.6218            | 0.6218 |
| TDDA_480_18.txt | 302.00      | 331.3505    | 47.4294      | 47.3347      | 47.3347      | 47.3340      | 47.3340           | 0.6197            | 0.6210            | 0.6210            | 0.6210 |
| TDDA_480_18.txt | 305.00      | 330.4794    | 56.8200      | 56.6600      | 56.6583      | 56.6582      | 56.6582           | 0.6183            | 0.6201            | 0.6201            | 0.6201 |
| TDDA_480_18.txt | 308.00      | 329.5636    | 64.9223      | 64.6868      | 64.6837      | 64.6833      | 64.6833           | 0.6169            | 0.6193            | 0.6193            | 0.6193 |
| TDDA_480_18.txt | 312.00      | 328.5058    | 74.4821      | 74.1336      | 74.1277      | 74.1270      | 74.1270           | 0.6150            | 0.6180            | 0.6180            | 0.6180 |
| TDDA_480_18.txt | 315.00      | 327.6319    | 80.9587      | 80.5170      | 80.5083      | 80.5072      | 80.5072           | 0.6137            | 0.6172            | 0.6173            | 0.6172 |
| TDDA_480_18.txt | 320.00      | 326.2020    | 90.8320      | 90.2204      | 90.2056      | 90.2036      | 90.2036           | 0.6115            | 0.6159            | 0.6160            | 0.6159 |
| TDDA_480_18.txt | 325.00      | 324.8557    | 99.8620      | 99.0649      | 99.0424      | 99.0391      | 99.0391           | 0.6093            | 0.6145            | 0.6146            | 0.6146 |
| TDDA_480_18.txt | 330.00      | 323.5544    | 108.2544     | 107.2589     | 107.2268     | 107.2217     | 107.2217          | 0.6071            | 0.6131            | 0.6133            | 0.6132 |
| TDDA_480_18.txt | 340.00      | 320.9892    | 123.6071     | 122.1796     | 122.1230     | 122.1132     | 122.1132          | 0.6029            | 0.6105            | 0.6107            | 0.6106 |
| TDDA_480_18.txt | 350.00      | 318.5176    | 137.5802     | 135.6776     | 135.5888     | 135.5722     | 135.5722          | 0.5988            | 0.6079            | 0.6083            | 0.6081 |
| TDDA_480_18.txt | 365.00      | 315.1478    | 156.8256     | 154.1558     | 154.0064     | 153.9756     | 153.9756          | 0.5927            | 0.6038            | 0.6044            | 0.6042 |
| TDDA_480_18.txt | 380.00      | 312.1096    | 174.6287     | 171.1358     | 170.9118     | 170.8619     | 170.8619          | 0.5865            | 0.5996            | 0.6005            | 0.6002 |
| TDDA_480_18.txt | 420.00      | 304.4636    | 217.1812     | 211.2444     | 210.7505     | 210.6233     | 210.6233          | 0.5719            | 0.5898            | 0.5914            | 0.5909 |
| TDDA_480_18.txt | 470.00      | 296.8104    | 265.0052     | 255.7122     | 254.7695     | 254.4972     | 254.4972          | 0.5545            | 0.5773            | 0.5799            | 0.5794 |
| TDDA_480_18.txt | 530.00      | 288.9906    | 317.5139     | 303.8326     | 302.1982     | 301.6808     | 301.6808          | 0.5363            | 0.5640            | 0.5679            | 0.5674 |
| TDDA_480_18.txt | 600.00      | 281.6128    | 375.0466     | 355.9210     | 353.3149     | 352.4283     | 352.4283          | 0.5173            | 0.5494            | 0.5549            | 0.5546 |

|                 |         |          |          |          |          |          |        |        |        |        |
|-----------------|---------|----------|----------|----------|----------|----------|--------|--------|--------|--------|
| TDDA_480_18.txt | 680.00  | 275.0276 | 438.0952 | 412.5102 | 408.6338 | 407.2366 | 0.4975 | 0.5335 | 0.5407 | 0.5406 |
| TDDA_480_18.txt | 770.00  | 268.9201 | 506.3172 | 473.2116 | 467.7380 | 465.6684 | 0.4782 | 0.5175 | 0.5262 | 0.5266 |
| TDDA_480_18.txt | 870.00  | 263.5271 | 580.2646 | 538.6434 | 531.2510 | 528.3431 | 0.4591 | 0.5010 | 0.5113 | 0.5122 |
| TDDA_480_18.txt | 980.00  | 258.7479 | 659.9976 | 608.9260 | 599.3188 | 595.4165 | 0.4405 | 0.4844 | 0.4961 | 0.4975 |
| TDDA_480_18.txt | 1100.00 | 254.4165 | 745.3269 | 683.8427 | 671.6956 | 666.6222 | 0.4229 | 0.4683 | 0.4811 | 0.4832 |

Dispersion plot

alpha is obtained by dividing Mobility by zero field Mobility (not reduced)

| Ion             | Ed<br>(Td) | Ec<br>(Td) | alpha<br>(Td) | E/n<br>(Td) |
|-----------------|------------|------------|---------------|-------------|
| TDDA_480_18.txt | 0.0000     | 0.0000     | 0.0000        | 0.0000      |
| TDDA_480_18.txt | 17.8382    | 0.0015     | -0.0002       | 17.8382     |
| TDDA_480_18.txt | 25.2439    | 0.0044     | -0.0008       | 25.2439     |
| TDDA_480_18.txt | 33.4058    | 0.0066     | -0.0012       | 33.4058     |
| TDDA_480_18.txt | 39.9526    | 0.0088     | -0.0018       | 39.9526     |
| TDDA_480_18.txt | 47.3340    | 0.0149     | -0.0030       | 47.3340     |
| TDDA_480_18.txt | 56.6582    | 0.0274     | -0.0045       | 56.6582     |
| TDDA_480_18.txt | 64.6833    | 0.0420     | -0.0057       | 64.6833     |
| TDDA_480_18.txt | 74.1270    | 0.0670     | -0.0078       | 74.1270     |
| TDDA_480_18.txt | 80.5072    | 0.0864     | -0.0091       | 80.5072     |
| TDDA_480_18.txt | 90.2036    | 0.1184     | -0.0111       | 90.2036     |
| TDDA_480_18.txt | 99.0391    | 0.1524     | -0.0133       | 99.0391     |
| TDDA_480_18.txt | 107.2217   | 0.1900     | -0.0155       | 107.2217    |
| TDDA_480_18.txt | 122.1132   | 0.2736     | -0.0197       | 122.1132    |
| TDDA_480_18.txt | 135.5722   | 0.3649     | -0.0237       | 135.5722    |
| TDDA_480_18.txt | 153.9756   | 0.5184     | -0.0300       | 153.9756    |
| TDDA_480_18.txt | 170.8619   | 0.7012     | -0.0365       | 170.8619    |
| TDDA_480_18.txt | 210.6233   | 1.2400     | -0.0513       | 210.6233    |
| TDDA_480_18.txt | 254.4972   | 2.0549     | -0.0698       | 254.4972    |
| TDDA_480_18.txt | 301.6808   | 3.1615     | -0.0891       | 301.6808    |
| TDDA_480_18.txt | 352.4283   | 4.5675     | -0.1097       | 352.4283    |
| TDDA_480_18.txt | 407.2366   | 6.3900     | -0.1321       | 407.2366    |
| TDDA_480_18.txt | 465.6684   | 8.6204     | -0.1545       | 465.6684    |
| TDDA_480_18.txt | 528.3431   | 11.2881    | -0.1777       | 528.3431    |
| TDDA_480_18.txt | 595.4165   | 14.4889    | -0.2012       | 595.4165    |
| TDDA_480_18.txt | 666.6222   | 18.2358    | -0.2243       | 666.6222    |

LJTM calculation parameters:

Number of loops (itn) = 1  
 Number of velocity points (inp) = 5  
 Number of random rotations and impact parameters (imp) = 180000  
 Total Trajectories = 900000

Max time step = 1.00e-13 second  
 Min time step = 1.00e-16 second  
 Time step corrector = 100.00

Ratio of potential energy to kinetic energy at the starting of Traj (sw1) = 0.001000  
 Maximum value of [1-cosX] at b\_max (cmin) = 0.000100  
 Seed = 13  
 Time taken is a mere 650.696 seconds

PARAMETERS USED:

Gas: N2  
 Reduction Coef: 1.130  
 Molecular mass of Gas: 28.00 Da  
 Alpha polarization: 1.70 A3  
 Radius of gas: 1.50 A  
 Temperature: 295 K  
 Pressure: 101325 Pa

Lennard Jones parameters for basic  
 Atom eps(J\*10<sup>-21</sup>) sigma(A)

|    |              |              |
|----|--------------|--------------|
| H  | 0.4806000000 | 2.3000000000 |
| C  | 0.7449300000 | 3.5000000000 |
| O  | 0.6888600000 | 3.5000000000 |
| N  | 0.9291600000 | 4.2000000000 |
| F  | 0.1922400000 | 3.4000000000 |
| Cs | 0.5814000000 | 4.2008100000 |
| Na | 0.4167763200 | 3.5000000000 |
| Cl | 0.4167763200 | 3.5000000000 |
| I  | 0.6300000000 | 5.4000000000 |
| K  | 0.4167763200 | 3.5000000000 |
| Rb | 0.4167763200 | 3.5000000000 |

P 0.4167763200 3.5000000000  
 Ca 0.4167763200 3.5000000000  
 Li 0.4167763200 3.5000000000  
 S 0.4167763200 3.5000000000  
 Other 0.4167763200 3.5000000000

SUMMARY OF HIGH FIELD CALCULATIONS

FAIMS/DMS Dispersion field curve used

| ft<br>(AU)  | t<br>(s) |
|-------------|----------|
| 0.33333000  | 0.0000   |
| 0.28885000  | 0.1000   |
| 0.90371000  | 0.2000   |
| 0.90371000  | 0.3000   |
| 0.28885000  | 0.4000   |
| -0.33333000 | 0.5000   |
| -0.49486000 | 0.6000   |
| -0.36437000 | 0.7000   |
| -0.36437000 | 0.8000   |
| -0.49486000 | 0.9000   |
| -0.33333000 | 1.0000   |

| Ion                     | Teff<br>(K) | CCS<br>(A2) | E/n1<br>(Td) | E/n2<br>(Td) | E/n3<br>(Td) | E/n4<br>(Td) | <Ko1><br>(cm2/Vs) | <Ko2><br>(cm2/Vs) | <Ko3><br>(cm2/Vs) | <Ko4><br>(cm2/Vs) |
|-------------------------|-------------|-------------|--------------|--------------|--------------|--------------|-------------------|-------------------|-------------------|-------------------|
| TDDA_295_27.txt 295.00  | 312.0779    | 0.0000      | 0.0000       | 0.0000       | 0.0000       | 0.0000       | 0.0000            | 0.6657            | 0.6657            | 0.6657            |
| TDDA_295_27.txt 296.00  | 311.6951    | 16.6949     | 16.6897      | 16.6897      | 16.6897      | 16.6897      | 16.6897           | 0.6654            | 0.6656            | 0.6656            |
| TDDA_295_27.txt 297.00  | 311.4237    | 23.6294     | 23.6156      | 23.6155      | 23.6155      | 23.6155      | 23.6155           | 0.6649            | 0.6653            | 0.6653            |
| TDDA_295_27.txt 298.50  | 311.0390    | 31.2988     | 31.2676      | 31.2675      | 31.2675      | 31.2675      | 31.2675           | 0.6640            | 0.6647            | 0.6647            |
| TDDA_295_27.txt 300.00  | 310.6650    | 37.4580     | 37.4054      | 37.4054      | 37.4051      | 37.4051      | 37.4051           | 0.6631            | 0.6641            | 0.6641            |
| TDDA_295_27.txt 302.00  | 310.1155    | 44.3898     | 44.3035      | 44.3028      | 44.3028      | 44.3028      | 44.3028           | 0.6621            | 0.6635            | 0.6635            |
| TDDA_295_27.txt 305.00  | 309.1217    | 53.1480     | 53.0018      | 53.0002      | 53.0001      | 53.0001      | 53.0001           | 0.6610            | 0.6629            | 0.6629            |
| TDDA_295_27.txt 308.00  | 308.3246    | 60.7383     | 60.5236      | 60.5207      | 60.5204      | 60.5204      | 60.5204           | 0.6594            | 0.6619            | 0.6619            |
| TDDA_295_27.txt 312.00  | 307.2923    | 69.6724     | 69.3545      | 69.3491      | 69.3484      | 69.3484      | 69.3484           | 0.6574            | 0.6606            | 0.6606            |
| TDDA_295_27.txt 315.00  | 306.5770    | 75.7560     | 75.3537      | 75.3458      | 75.3448      | 75.3448      | 75.3448           | 0.6558            | 0.6595            | 0.6595            |
| TDDA_295_27.txt 320.00  | 305.3593    | 85.0283     | 84.4729      | 84.4597      | 84.4579      | 84.4579      | 84.4579           | 0.6532            | 0.6578            | 0.6578            |
| TDDA_295_27.txt 325.00  | 304.1019    | 93.4822     | 92.7596      | 92.7395      | 92.7366      | 92.7366      | 92.7366           | 0.6509            | 0.6563            | 0.6563            |
| TDDA_295_27.txt 330.00  | 302.7850    | 101.3054    | 100.4019     | 100.3732     | 100.3688     | 100.3688     | 100.3688          | 0.6487            | 0.6550            | 0.6551            |
| TDDA_295_27.txt 340.00  | 300.5196    | 115.7246    | 114.4338     | 114.3836     | 114.3751     | 114.3751     | 114.3751          | 0.6439            | 0.6518            | 0.6520            |
| TDDA_295_27.txt 350.00  | 298.3634    | 128.8748    | 127.1631     | 127.0857     | 127.0713     | 127.0713     | 127.0713          | 0.6393            | 0.6486            | 0.6489            |
| TDDA_295_27.txt 365.00  | 295.1132    | 146.8559    | 144.4541     | 144.3240     | 144.2974     | 144.2974     | 144.2974          | 0.6329            | 0.6444            | 0.6447            |
| TDDA_295_27.txt 380.00  | 292.0231    | 163.3901    | 160.2389     | 160.0426     | 159.9992     | 159.9992     | 159.9992          | 0.6268            | 0.6404            | 0.6412            |
| TDDA_295_27.txt 420.00  | 284.7625    | 203.1280    | 197.7798     | 197.3500     | 197.2399     | 197.2399     | 197.2399          | 0.6114            | 0.6298            | 0.6314            |
| TDDA_295_27.txt 470.00  | 277.3159    | 247.5996    | 239.2132     | 238.3907     | 238.1541     | 238.1541     | 238.1541          | 0.5935            | 0.6170            | 0.6196            |
| TDDA_295_27.txt 530.00  | 269.8743    | 296.5109    | 284.1489     | 282.7231     | 282.2732     | 282.2732     | 282.2732          | 0.5743            | 0.6029            | 0.6068            |
| TDDA_295_27.txt 600.00  | 262.6642    | 349.8112    | 332.5064     | 330.2322     | 329.4601     | 329.4601     | 329.4601          | 0.5546            | 0.5879            | 0.5934            |
| TDDA_295_27.txt 680.00  | 256.1431    | 408.0136    | 384.7830     | 381.3804     | 380.1548     | 380.1548     | 380.1548          | 0.5342            | 0.5718            | 0.5790            |
| TDDA_295_27.txt 770.00  | 250.3786    | 471.4077    | 441.3203     | 436.5107     | 434.6938     | 434.6938     | 434.6938          | 0.5136            | 0.5546            | 0.5635            |
| TDDA_295_27.txt 870.00  | 245.1286    | 539.7528    | 501.8632     | 495.3576     | 492.8011     | 492.8011     | 492.8011          | 0.4935            | 0.5374            | 0.5479            |
| TDDA_295_27.txt 980.00  | 240.4185    | 613.2442    | 566.6109     | 558.1067     | 554.6532     | 554.6532     | 554.6532          | 0.4741            | 0.5203            | 0.5323            |
| TDDA_295_27.txt 1100.00 | 236.3535    | 692.4105    | 636.2268     | 625.4757     | 620.9927     | 620.9927     | 620.9927          | 0.4552            | 0.5030            | 0.5163            |
| TDDA_390_25.txt 295.00  | 318.8685    | 0.0000      | 0.0000       | 0.0000       | 0.0000       | 0.0000       | 0.6515            | 0.6515            | 0.6515            | 0.6515            |
| TDDA_390_25.txt 296.00  | 318.5872    | 17.0640     | 17.0587      | 17.0587      | 17.0587      | 17.0587      | 17.0587           | 0.6510            | 0.6512            | 0.6512            |
| TDDA_390_25.txt 297.00  | 318.3619    | 24.1558     | 24.1415      | 24.1415      | 24.1415      | 24.1415      | 24.1415           | 0.6504            | 0.6508            | 0.6508            |
| TDDA_390_25.txt 298.50  | 317.9453    | 31.9938     | 31.9615      | 31.9614      | 31.9614      | 31.9614      | 31.9614           | 0.6496            | 0.6503            | 0.6503            |
| TDDA_390_25.txt 300.00  | 317.4760    | 38.2793     | 38.2248      | 38.2245      | 38.2245      | 38.2245      | 38.2245           | 0.6489            | 0.6499            | 0.6499            |
| TDDA_390_25.txt 302.00  | 316.8498    | 45.3538     | 45.2644      | 45.2637      | 45.2637      | 45.2637      | 45.2637           | 0.6480            | 0.6494            | 0.6494            |
| TDDA_390_25.txt 305.00  | 315.9245    | 54.3176     | 54.1662      | 54.1646      | 54.1645      | 54.1645      | 54.1645           | 0.6467            | 0.6486            | 0.6486            |
| TDDA_390_25.txt 308.00  | 315.1493    | 62.0827     | 61.8602      | 61.8574      | 61.8570      | 61.8570      | 61.8570           | 0.6452            | 0.6476            | 0.6476            |
| TDDA_390_25.txt 312.00  | 313.9666    | 71.1856     | 70.8557      | 70.8503      | 70.8496      | 70.8496      | 70.8496           | 0.6434            | 0.6466            | 0.6466            |
| TDDA_390_25.txt 315.00  | 313.1509    | 77.3804     | 76.9622      | 76.9541      | 76.9531      | 76.9531      | 76.9531           | 0.6420            | 0.6457            | 0.6458            |
| TDDA_390_25.txt 320.00  | 311.7680    | 86.8128     | 86.2347      | 86.2211      | 86.2193      | 86.2193      | 86.2193           | 0.6398            | 0.6444            | 0.6444            |
| TDDA_390_25.txt 325.00  | 310.7306    | 95.5198     | 94.7696      | 94.7491      | 94.7461      | 94.7461      | 94.7461           | 0.6370            | 0.6424            | 0.6425            |
| TDDA_390_25.txt 330.00  | 309.4283    | 103.5281    | 102.5907     | 102.5615     | 102.5569     | 102.5569     | 102.5569          | 0.6348            | 0.6410            | 0.6412            |
| TDDA_390_25.txt 340.00  | 307.0109    | 118.2243    | 116.8823     | 116.8311     | 116.8223     | 116.8223     | 116.8223          | 0.6303            | 0.6381            | 0.6384            |
| TDDA_390_25.txt 350.00  | 304.6815    | 131.6039    | 129.8191     | 129.7394     | 129.7244     | 129.7244     | 129.7244          | 0.6260            | 0.6353            | 0.6357            |
| TDDA_390_25.txt 365.00  | 301.3851    | 149.9770    | 147.4703     | 147.3361     | 147.3084     | 147.3084     | 147.3084          | 0.6197            | 0.6312            | 0.6318            |
| TDDA_390_25.txt 380.00  | 298.3437    | 166.9266    | 163.6433     | 163.4413     | 163.3963     | 163.3963     | 163.3963          | 0.6136            | 0.6270            | 0.6278            |
| TDDA_390_25.txt 420.00  | 290.9305    | 207.5277    | 201.9456     | 201.5008     | 201.3859     | 201.3859     | 201.3859          | 0.5985            | 0.6169            | 0.6184            |
| TDDA_390_25.txt 470.00  | 283.2816    | 252.9260    | 244.1529     | 243.2968     | 243.0487     | 243.0487     | 243.0487          | 0.5810            | 0.6045            | 0.6071            |
| TDDA_390_25.txt 530.00  | 275.9434    | 303.1791    | 290.2833     | 288.8077     | 288.3405     | 288.3405     | 288.3405          | 0.5617            | 0.5901            | 0.5941            |
| TDDA_390_25.txt 600.00  | 268.8544    | 358.0552    | 339.9953     | 337.6300     | 336.8258     | 336.8258     | 336.8258          | 0.5418            | 0.5750            | 0.5805            |
| TDDA_390_25.txt 680.00  | 262.3262    | 417.8629    | 393.6379     | 390.0951     | 388.8187     | 388.8187     | 388.8187          | 0.5216            | 0.5589            | 0.5661            |
| TDDA_390_25.txt 770.00  | 256.3943    | 482.7339    | 451.3467     | 446.3275     | 444.4310     | 444.4310     | 444.4310          | 0.5015            | 0.5423            | 0.5512            |
| TDDA_390_25.txt 870.00  | 251.1495    | 553.0102    | 513.4997     | 506.6939     | 504.0182     | 504.0182     | 504.0182          | 0.4817            | 0.5253            | 0.5358            |
| TDDA_390_25.txt 980.00  | 246.4533    | 628.6375    | 580.0780     | 571.1983     | 567.5907     | 567.5907     | 567.5907          | 0.4625            | 0.5083            | 0.5202            |



|                 |         |          |          |          |          |          |        |        |        |        |
|-----------------|---------|----------|----------|----------|----------|----------|--------|--------|--------|--------|
| TDDA_390_25.txt | 1100.00 | 242.2431 | 709.6643 | 651.1015 | 639.8275 | 635.1169 | 0.4441 | 0.4916 | 0.5048 | 0.5069 |
| TDDA_480_18.txt | 295.00  | 333.5457 | 0.0000   | 0.0000   | 0.0000   | 0.0000   | 0.6229 | 0.6229 | 0.6229 | 0.6229 |
| TDDA_480_18.txt | 296.00  | 333.1468 | 17.8439  | 17.8383  | 17.8382  | 17.8382  | 0.6226 | 0.6228 | 0.6228 | 0.6228 |
| TDDA_480_18.txt | 297.00  | 332.9022 | 25.2591  | 25.2439  | 25.2439  | 25.2439  | 0.6220 | 0.6223 | 0.6223 | 0.6223 |
| TDDA_480_18.txt | 298.50  | 332.3186 | 33.4401  | 33.4059  | 33.4058  | 33.4058  | 0.6215 | 0.6221 | 0.6221 | 0.6221 |
| TDDA_480_18.txt | 300.00  | 331.8359 | 40.0107  | 39.9529  | 39.9526  | 39.9526  | 0.6208 | 0.6218 | 0.6218 | 0.6218 |
| TDDA_480_18.txt | 302.00  | 331.3505 | 47.4294  | 47.3347  | 47.3340  | 47.3340  | 0.6197 | 0.6210 | 0.6210 | 0.6210 |
| TDDA_480_18.txt | 305.00  | 330.4794 | 56.8200  | 56.6600  | 56.6583  | 56.6582  | 0.6183 | 0.6201 | 0.6201 | 0.6201 |
| TDDA_480_18.txt | 308.00  | 329.5636 | 64.9223  | 64.6868  | 64.6837  | 64.6833  | 0.6169 | 0.6193 | 0.6193 | 0.6193 |
| TDDA_480_18.txt | 312.00  | 328.5058 | 74.4821  | 74.1336  | 74.1277  | 74.1270  | 0.6150 | 0.6180 | 0.6180 | 0.6180 |
| TDDA_480_18.txt | 315.00  | 327.6310 | 80.9587  | 80.5170  | 80.5083  | 80.5072  | 0.6137 | 0.6172 | 0.6173 | 0.6172 |
| TDDA_480_18.txt | 320.00  | 326.2020 | 90.8320  | 90.2204  | 90.2056  | 90.2036  | 0.6115 | 0.6159 | 0.6160 | 0.6159 |
| TDDA_480_18.txt | 325.00  | 324.8557 | 99.8620  | 99.0649  | 99.0424  | 99.0391  | 0.6093 | 0.6145 | 0.6146 | 0.6146 |
| TDDA_480_18.txt | 330.00  | 323.5544 | 108.2544 | 107.2589 | 107.2268 | 107.2217 | 0.6071 | 0.6131 | 0.6133 | 0.6132 |
| TDDA_480_18.txt | 340.00  | 320.9892 | 123.6071 | 122.1796 | 122.1230 | 122.1132 | 0.6029 | 0.6105 | 0.6107 | 0.6106 |
| TDDA_480_18.txt | 350.00  | 318.5176 | 137.5802 | 135.6776 | 135.5888 | 135.5722 | 0.5988 | 0.6079 | 0.6083 | 0.6081 |
| TDDA_480_18.txt | 365.00  | 315.1478 | 156.8256 | 154.1558 | 154.0064 | 153.9756 | 0.5927 | 0.6038 | 0.6044 | 0.6042 |
| TDDA_480_18.txt | 380.00  | 312.1096 | 174.6287 | 171.1358 | 170.9118 | 170.8619 | 0.5865 | 0.5996 | 0.6005 | 0.6002 |
| TDDA_480_18.txt | 420.00  | 304.4636 | 217.1812 | 211.2444 | 210.7505 | 210.6233 | 0.5719 | 0.5898 | 0.5914 | 0.5909 |
| TDDA_480_18.txt | 470.00  | 296.8104 | 265.0052 | 255.7122 | 254.7695 | 254.4972 | 0.5545 | 0.5773 | 0.5799 | 0.5794 |
| TDDA_480_18.txt | 530.00  | 288.9906 | 317.5139 | 303.8326 | 302.1982 | 301.6808 | 0.5363 | 0.5640 | 0.5679 | 0.5674 |
| TDDA_480_18.txt | 600.00  | 281.6128 | 375.0466 | 355.9210 | 353.3149 | 352.4283 | 0.5173 | 0.5494 | 0.5549 | 0.5546 |
| TDDA_480_18.txt | 680.00  | 275.0276 | 438.0952 | 412.5102 | 408.6338 | 407.2366 | 0.4975 | 0.5335 | 0.5407 | 0.5406 |
| TDDA_480_18.txt | 770.00  | 268.9201 | 506.3172 | 473.2116 | 467.7380 | 465.6684 | 0.4782 | 0.5175 | 0.5262 | 0.5266 |
| TDDA_480_18.txt | 870.00  | 263.5271 | 580.2646 | 538.6434 | 531.2510 | 528.3431 | 0.4591 | 0.5010 | 0.5113 | 0.5122 |
| TDDA_480_18.txt | 980.00  | 258.7479 | 659.9976 | 608.9260 | 599.3188 | 595.4165 | 0.4405 | 0.4844 | 0.4961 | 0.4975 |
| TDDA_480_18.txt | 1100.00 | 254.4165 | 745.3269 | 683.8427 | 671.6956 | 666.6222 | 0.4229 | 0.4683 | 0.4811 | 0.4832 |

TAA\_multiTemperature\_candidate2.xlsx - Sheet #1

| x         | y         | z         | Radius  | Charge       | Atom |    |
|-----------|-----------|-----------|---------|--------------|------|----|
| 11.245000 | -6.793640 | -0.613950 | 1.55000 | 0.0067114000 |      | 14 |
| 10.755000 | -8.171380 | -1.111000 | 1.70000 | 0.0067114000 | 1    | 12 |
| 11.074100 | -9.373160 | -0.230350 | 1.70000 | 0.0067114000 |      | 12 |
| 10.337900 | -10.63610 | -0.759200 | 1.70000 | 0.0067114000 | 690  | 12 |
| 10.563300 | -11.80610 | 0.135020  | 1.70000 | 0.0067114000 |      | 12 |
| 10.045100 | -11.73810 | 1.580600  | 1.70000 | 0.0067114000 |      | 12 |
| 11.086800 | -11.35550 | 2.577000  | 1.70000 | 0.0067114000 |      | 12 |
| 10.487900 | -10.76280 | 3.853000  | 1.70000 | 0.0067114000 |      | 12 |
| 11.591700 | -10.34290 | 4.918300  | 1.70000 | 0.0067114000 |      | 12 |
| 12.404300 | -9.177060 | 4.381900  | 1.70000 | 0.0067114000 |      | 12 |
| 11.677600 | -7.817870 | 4.437000  | 1.70000 | 0.0067114000 |      | 12 |
| 12.565600 | -6.567150 | 4.075300  | 1.70000 | 0.0067114000 |      | 12 |
| 11.837200 | -5.313840 | 4.591300  | 1.70000 | 0.0067114000 |      | 12 |
| 11.132300 | -5.784770 | -1.749000 | 1.70000 | 0.0067114000 |      | 12 |
| 9.770790  | -5.562390 | -2.466500 | 1.70000 | 0.0067114000 |      | 12 |
| 9.846020  | -4.717950 | -3.785200 | 1.70000 | 0.0067114000 |      | 12 |
| 10.210600 | -3.268330 | -3.639700 | 1.70000 | 0.0067114000 |      | 12 |
| 9.717580  | -2.337030 | -4.734600 | 1.70000 | 0.0067114000 |      | 12 |
| 10.209700 | -0.879950 | -4.716800 | 1.70000 | 0.0067114000 |      | 12 |
| 9.754270  | -0.237051 | -3.438000 | 1.70000 | 0.0067114000 |      | 12 |
| 10.329900 | 1.092930  | -3.128800 | 1.70000 | 0.0067114000 |      | 12 |
| 10.017100 | 1.493740  | -1.674200 | 1.70000 | 0.0067114000 |      | 12 |
| 8.639990  | 2.126520  | -1.656400 | 1.70000 | 0.0067114000 |      | 12 |
| 8.056250  | 2.105870  | -0.172420 | 1.70000 | 0.0067114000 |      | 12 |
| 6.763250  | 2.998650  | -0.177120 | 1.70000 | 0.0067114000 |      | 12 |
| 10.570800 | -6.312920 | 0.674460  | 1.70000 | 0.0067114000 |      | 12 |
| 9.085290  | -6.097140 | 0.621600  | 1.70000 | 0.0067114000 |      | 12 |
| 8.485170  | -5.793630 | 2.043000  | 1.70000 | 0.0067114000 |      | 12 |
| 6.979520  | -5.655650 | 2.046800  | 1.70000 | 0.0067114000 |      | 12 |
| 6.175460  | -6.807870 | 1.342800  | 1.70000 | 0.0067114000 |      | 12 |
| 6.594590  | -8.210990 | 1.785500  | 1.70000 | 0.0067114000 |      | 12 |
| 6.373430  | -8.478130 | 3.291600  | 1.70000 | 0.0067114000 |      | 12 |
| 6.397300  | -10.02350 | 3.574100  | 1.70000 | 0.0067114000 |      | 12 |
| 6.300080  | -10.20640 | 5.089700  | 1.70000 | 0.0067114000 |      | 12 |
| 6.384840  | -11.66690 | 5.541500  | 1.70000 | 0.0067114000 |      | 12 |
| 6.267410  | -12.06850 | 7.094100  | 1.70000 | 0.0067114000 |      | 12 |
| 6.328690  | -13.62620 | 7.248400  | 1.70000 | 0.0067114000 |      | 12 |
| 12.732700 | -6.891870 | -0.076261 | 1.70000 | 0.0067114000 |      | 12 |
| 13.749900 | -7.165220 | -1.216400 | 1.70000 | 0.0067114000 |      | 12 |
| 15.200200 | -7.213800 | -0.728150 | 1.70000 | 0.0067114000 |      | 12 |
| 15.840700 | -6.039180 | -0.007511 | 1.70000 | 0.0067114000 |      | 12 |
| 16.088000 | -4.736920 | -0.868340 | 1.70000 | 0.0067114000 |      | 12 |
| 14.849200 | -3.725560 | -0.744260 | 1.70000 | 0.0067114000 |      | 12 |
| 15.294300 | -2.432400 | -1.521000 | 1.70000 | 0.0067114000 |      | 12 |
| 14.222900 | -1.315250 | -1.607800 | 1.70000 | 0.0067114000 |      | 12 |

|           |           |           |         |              |    |
|-----------|-----------|-----------|---------|--------------|----|
| 14.850700 | -0.020165 | -2.066100 | 1.70000 | 0.0067114000 | 12 |
| 15.808100 | 0.601212  | -0.933120 | 1.70000 | 0.0067114000 | 12 |
| 16.296700 | 2.024960  | -1.369400 | 1.70000 | 0.0067114000 | 12 |
| 17.163100 | 2.537690  | -0.219520 | 1.70000 | 0.0067114000 | 12 |
| 9.705510  | -8.292010 | -1.371400 | 1.10000 | 0.0067114000 | 1  |
| 11.273500 | -8.246130 | -2.037400 | 1.10000 | 0.0067114000 | 1  |
| 12.175500 | -9.543910 | -0.128880 | 1.10000 | 0.0067114000 | 1  |
| 10.725600 | -9.182930 | 0.856550  | 1.10000 | 0.0067114000 | 1  |
| 9.207590  | -10.34100 | -0.746940 | 1.10000 | 0.0067114000 | 1  |
| 10.595400 | -11.01170 | -1.784700 | 1.10000 | 0.0067114000 | 1  |
| 10.035800 | -12.68230 | -0.396700 | 1.10000 | 0.0067114000 | 1  |
| 11.697500 | -12.07980 | 0.105180  | 1.10000 | 0.0067114000 | 1  |
| 9.234440  | -10.99850 | 1.687200  | 1.10000 | 0.0067114000 | 1  |
| 9.619540  | -12.68090 | 1.944500  | 1.10000 | 0.0067114000 | 1  |
| 11.831100 | -12.11830 | 2.757900  | 1.10000 | 0.0067114000 | 1  |
| 11.703000 | -10.53710 | 2.021200  | 1.10000 | 0.0067114000 | 1  |
| 9.747380  | -9.915310 | 3.724100  | 1.10000 | 0.0067114000 | 1  |
| 9.824700  | -11.59580 | 4.309600  | 1.10000 | 0.0067114000 | 1  |
| 11.228300 | -9.858010 | 5.812100  | 1.10000 | 0.0067114000 | 1  |
| 12.152200 | -11.23830 | 5.310100  | 1.10000 | 0.0067114000 | 1  |
| 13.324300 | -9.179270 | 5.030900  | 1.10000 | 0.0067114000 | 1  |
| 12.857200 | -9.568620 | 3.369100  | 1.10000 | 0.0067114000 | 1  |
| 10.925500 | -7.884370 | 3.614900  | 1.10000 | 0.0067114000 | 1  |
| 11.297900 | -7.666900 | 5.429100  | 1.10000 | 0.0067114000 | 1  |
| 13.503900 | -6.770060 | 4.671800  | 1.10000 | 0.0067114000 | 1  |
| 12.746700 | -6.356510 | 2.998500  | 1.10000 | 0.0067114000 | 1  |
| 12.467000 | -4.415900 | 4.459600  | 1.10000 | 0.0067114000 | 1  |
| 10.866800 | -5.102440 | 4.154300  | 1.10000 | 0.0067114000 | 1  |
| 11.637700 | -5.508350 | 5.693000  | 1.10000 | 0.0067114000 | 1  |
| 11.551300 | -4.790270 | -1.538200 | 1.10000 | 0.0067114000 | 1  |
| 11.785700 | -6.144590 | -2.643400 | 1.10000 | 0.0067114000 | 1  |
| 9.350650  | -6.548400 | -2.635600 | 1.10000 | 0.0067114000 | 1  |
| 8.983280  | -5.027110 | -1.872400 | 1.10000 | 0.0067114000 | 1  |
| 10.647400 | -5.137810 | -4.331200 | 1.10000 | 0.0067114000 | 1  |
| 8.946800  | -4.786040 | -4.457500 | 1.10000 | 0.0067114000 | 1  |
| 9.680150  | -3.031070 | -2.715500 | 1.10000 | 0.0067114000 | 1  |
| 11.268700 | -3.079880 | -3.428400 | 1.10000 | 0.0067114000 | 1  |
| 10.181600 | -2.862610 | -5.727700 | 1.10000 | 0.0067114000 | 1  |
| 8.575520  | -2.253570 | -4.661700 | 1.10000 | 0.0067114000 | 1  |
| 11.323800 | -0.896496 | -4.669900 | 1.10000 | 0.0067114000 | 1  |
| 9.854320  | -0.180062 | -5.501500 | 1.10000 | 0.0067114000 | 1  |
| 8.615810  | -0.071302 | -3.399000 | 1.10000 | 0.0067114000 | 1  |
| 9.924540  | -0.810896 | -2.513600 | 1.10000 | 0.0067114000 | 1  |
| 11.406500 | 1.163810  | -3.420900 | 1.10000 | 0.0067114000 | 1  |
| 10.048100 | 1.995200  | -3.702900 | 1.10000 | 0.0067114000 | 1  |
| 10.067100 | 0.530019  | -1.097800 | 1.10000 | 0.0067114000 | 1  |
| 10.826200 | 2.043150  | -1.225500 | 1.10000 | 0.0067114000 | 1  |
| 7.776990  | 1.755960  | -2.294100 | 1.10000 | 0.0067114000 | 1  |
| 8.813140  | 3.223520  | -1.859500 | 1.10000 | 0.0067114000 | 1  |
| 7.971090  | 1.062110  | 0.176570  | 1.10000 | 0.0067114000 | 1  |
| 8.842930  | 2.468290  | 0.559310  | 1.10000 | 0.0067114000 | 1  |
| 6.950450  | 4.092980  | -0.289510 | 1.10000 | 0.0067114000 | 1  |
| 6.047750  | 2.609320  | -0.982650 | 1.10000 | 0.0067114000 | 1  |
| 6.171990  | 2.806810  | 0.679100  | 1.10000 | 0.0067114000 | 1  |
| 10.631700 | -7.117250 | 1.431800  | 1.10000 | 0.0067114000 | 1  |
| 10.987700 | -5.357770 | 1.027000  | 1.10000 | 0.0067114000 | 1  |
| 8.848700  | -5.202500 | 0.023456  | 1.10000 | 0.0067114000 | 1  |
| 8.581500  | -6.969910 | 0.185380  | 1.10000 | 0.0067114000 | 1  |
| 8.973650  | -6.604670 | 2.594800  | 1.10000 | 0.0067114000 | 1  |
| 8.867220  | -4.838450 | 2.401300  | 1.10000 | 0.0067114000 | 1  |
| 6.513110  | -5.492720 | 3.028900  | 1.10000 | 0.0067114000 | 1  |
| 6.661570  | -4.653880 | 1.539500  | 1.10000 | 0.0067114000 | 1  |
| 5.119080  | -6.627720 | 1.736600  | 1.10000 | 0.0067114000 | 1  |
| 6.174110  | -6.563210 | 0.316660  | 1.10000 | 0.0067114000 | 1  |
| 5.909680  | -8.940360 | 1.354500  | 1.10000 | 0.0067114000 | 1  |
| 7.578420  | -8.491480 | 1.471300  | 1.10000 | 0.0067114000 | 1  |
| 7.265700  | -8.148800 | 3.783500  | 1.10000 | 0.0067114000 | 1  |
| 5.469470  | -7.972900 | 3.810300  | 1.10000 | 0.0067114000 | 1  |
| 5.682660  | -10.65050 | 3.039800  | 1.10000 | 0.0067114000 | 1  |
| 7.481080  | -10.37510 | 3.227600  | 1.10000 | 0.0067114000 | 1  |
| 7.073190  | -9.617860 | 5.507000  | 1.10000 | 0.0067114000 | 1  |
| 5.317630  | -9.655180 | 5.459200  | 1.10000 | 0.0067114000 | 1  |
| 5.549570  | -12.17450 | 5.096200  | 1.10000 | 0.0067114000 | 1  |
| 7.206010  | -12.07260 | 4.967700  | 1.10000 | 0.0067114000 | 1  |
| 5.329430  | -11.61780 | 7.565400  | 1.10000 | 0.0067114000 | 1  |
| 7.091620  | -11.62700 | 7.642600  | 1.10000 | 0.0067114000 | 1  |
| 6.218060  | -13.85040 | 8.287900  | 1.10000 | 0.0067114000 | 1  |
| 7.382260  | -13.87390 | 6.959900  | 1.10000 | 0.0067114000 | 1  |
| 5.528260  | -14.11390 | 6.660200  | 1.10000 | 0.0067114000 | 1  |
| 12.965600 | -5.862770 | 0.338100  | 1.10000 | 0.0067114000 | 1  |

|           |           |           |         |              |   |
|-----------|-----------|-----------|---------|--------------|---|
| 12.807600 | -7.617020 | 0.709390  | 1.10000 | 0.0067114000 | 1 |
| 13.459500 | -8.113830 | -1.621700 | 1.10000 | 0.0067114000 | 1 |
| 13.680000 | -6.331540 | -1.981200 | 1.10000 | 0.0067114000 | 1 |
| 15.449700 | -8.103840 | -0.069326 | 1.10000 | 0.0067114000 | 1 |
| 15.792900 | -7.454130 | -1.650500 | 1.10000 | 0.0067114000 | 1 |
| 15.170000 | -5.939420 | 0.937610  | 1.10000 | 0.0067114000 | 1 |
| 16.878100 | -6.279270 | 0.340140  | 1.10000 | 0.0067114000 | 1 |
| 17.010600 | -4.262360 | -0.481660 | 1.10000 | 0.0067114000 | 1 |
| 16.311200 | -5.025020 | -1.922600 | 1.10000 | 0.0067114000 | 1 |
| 13.951200 | -4.051120 | -1.332100 | 1.10000 | 0.0067114000 | 1 |
| 14.559300 | -3.404120 | 0.286800  | 1.10000 | 0.0067114000 | 1 |
| 16.130600 | -2.183680 | -0.895880 | 1.10000 | 0.0067114000 | 1 |
| 15.551100 | -2.577520 | -2.590800 | 1.10000 | 0.0067114000 | 1 |
| 13.475900 | -1.571870 | -2.388300 | 1.10000 | 0.0067114000 | 1 |
| 13.838000 | -1.075040 | -0.488690 | 1.10000 | 0.0067114000 | 1 |
| 15.537300 | -0.279990 | -2.882400 | 1.10000 | 0.0067114000 | 1 |
| 14.131200 | 0.680190  | -2.534300 | 1.10000 | 0.0067114000 | 1 |
| 15.202200 | 0.638080  | -0.015153 | 1.10000 | 0.0067114000 | 1 |
| 16.749100 | 0.001803  | -0.743200 | 1.10000 | 0.0067114000 | 1 |
| 16.864300 | 2.097060  | -2.329400 | 1.10000 | 0.0067114000 | 1 |
| 15.439000 | 2.680370  | -1.430100 | 1.10000 | 0.0067114000 | 1 |
| 18.039500 | 1.792880  | -0.214130 | 1.10000 | 0.0067114000 | 1 |
| 17.633300 | 3.535310  | -0.491640 | 1.10000 | 0.0067114000 | 1 |
| 16.751300 | 2.483970  | 0.841370  | 1.10000 | 0.0067114000 | 1 |

TAA\_multiTemperature\_candidate2.xlsx - Sheet #2

| x         | y         | z         | Radius  | Charge       | Atom |    |
|-----------|-----------|-----------|---------|--------------|------|----|
| 9.861900  | -4.248160 | -1.183800 | 1.55000 | 0.0067114000 |      | 14 |
| 10.018700 | -4.754160 | 0.252220  | 1.70000 | 0.0067114000 | 1    | 12 |
| 8.689220  | -4.990170 | 1.109400  | 1.70000 | 0.0067114000 |      | 12 |
| 8.657960  | -6.403790 | 1.617300  | 1.70000 | 0.0067114000 | 690  | 12 |
| 9.851520  | -7.010100 | 2.336700  | 1.70000 | 0.0067114000 |      | 12 |
| 9.410420  | -8.163950 | 3.232400  | 1.70000 | 0.0067114000 |      | 12 |
| 8.824350  | -9.330680 | 2.345100  | 1.70000 | 0.0067114000 |      | 12 |
| 8.420220  | -10.53670 | 3.156400  | 1.70000 | 0.0067114000 |      | 12 |
| 8.114860  | -11.86670 | 2.371600  | 1.70000 | 0.0067114000 |      | 12 |
| 9.349980  | -12.81820 | 2.447200  | 1.70000 | 0.0067114000 |      | 12 |
| 9.288560  | -14.16500 | 1.636900  | 1.70000 | 0.0067114000 |      | 12 |
| 10.743100 | -14.78920 | 1.896700  | 1.70000 | 0.0067114000 |      | 12 |
| 11.857500 | -14.10920 | 1.031500  | 1.70000 | 0.0067114000 |      | 12 |
| 11.211600 | -4.253770 | -1.898900 | 1.70000 | 0.0067114000 |      | 12 |
| 12.358300 | -3.341710 | -1.378600 | 1.70000 | 0.0067114000 |      | 12 |
| 13.617300 | -4.108460 | -1.794800 | 1.70000 | 0.0067114000 |      | 12 |
| 13.986700 | -5.306800 | -0.725440 | 1.70000 | 0.0067114000 |      | 12 |
| 14.318800 | -5.091940 | 0.761180  | 1.70000 | 0.0067114000 |      | 12 |
| 15.475300 | -4.069120 | 0.853900  | 1.70000 | 0.0067114000 |      | 12 |
| 16.127700 | -3.883260 | 2.278500  | 1.70000 | 0.0067114000 |      | 12 |
| 16.563800 | -5.155020 | 3.064400  | 1.70000 | 0.0067114000 |      | 12 |
| 17.672300 | -5.998460 | 2.322600  | 1.70000 | 0.0067114000 |      | 12 |
| 17.900100 | -7.464430 | 2.844500  | 1.70000 | 0.0067114000 |      | 12 |
| 19.398800 | -7.770900 | 2.926900  | 1.70000 | 0.0067114000 |      | 12 |
| 20.057600 | -7.670190 | 1.455500  | 1.70000 | 0.0067114000 |      | 12 |
| 8.933670  | -5.170270 | -2.007900 | 1.70000 | 0.0067114000 |      | 12 |
| 9.519190  | -6.576290 | -1.963600 | 1.70000 | 0.0067114000 |      | 12 |
| 8.328780  | -7.609040 | -2.080400 | 1.70000 | 0.0067114000 |      | 12 |
| 8.807090  | -8.975820 | -2.596100 | 1.70000 | 0.0067114000 |      | 12 |
| 9.617670  | -9.653180 | -1.547100 | 1.70000 | 0.0067114000 |      | 12 |
| 10.370400 | -10.88980 | -1.994500 | 1.70000 | 0.0067114000 |      | 12 |
| 11.470400 | -10.72700 | -3.056100 | 1.70000 | 0.0067114000 |      | 12 |
| 12.467700 | -9.591820 | -2.720700 | 1.70000 | 0.0067114000 |      | 12 |
| 13.361800 | -9.943700 | -1.424400 | 1.70000 | 0.0067114000 |      | 12 |
| 14.706800 | -9.234990 | -1.436200 | 1.70000 | 0.0067114000 |      | 12 |
| 15.592200 | -9.586190 | -0.188800 | 1.70000 | 0.0067114000 |      | 12 |
| 15.912300 | -11.02170 | 0.005199  | 1.70000 | 0.0067114000 |      | 12 |
| 9.161330  | -2.777330 | -1.208500 | 1.70000 | 0.0067114000 |      | 12 |
| 9.692230  | -1.608470 | -0.366830 | 1.70000 | 0.0067114000 |      | 12 |
| 8.920310  | -0.327402 | -0.629790 | 1.70000 | 0.0067114000 |      | 12 |
| 9.570630  | 0.891276  | 0.056550  | 1.70000 | 0.0067114000 |      | 12 |
| 8.595680  | 2.063280  | -0.016932 | 1.70000 | 0.0067114000 |      | 12 |
| 7.388460  | 2.100300  | 1.006800  | 1.70000 | 0.0067114000 |      | 12 |
| 6.155400  | 2.882420  | 0.628880  | 1.70000 | 0.0067114000 |      | 12 |
| 5.002880  | 2.793360  | 1.652800  | 1.70000 | 0.0067114000 |      | 12 |
| 4.234700  | 4.079430  | 1.915200  | 1.70000 | 0.0067114000 |      | 12 |
| 3.095560  | 4.007560  | 2.952600  | 1.70000 | 0.0067114000 |      | 12 |
| 2.702640  | 5.493730  | 3.241800  | 1.70000 | 0.0067114000 |      | 12 |
| 2.229990  | 5.678640  | 4.761400  | 1.70000 | 0.0067114000 |      | 12 |
| 10.764200 | -5.579030 | 0.344120  | 1.10000 | 0.0067114000 |      | 1  |
| 10.609500 | -3.993420 | 0.743120  | 1.10000 | 0.0067114000 |      | 1  |

|           |           |           |         |              |   |
|-----------|-----------|-----------|---------|--------------|---|
| 8.734950  | -4.257950 | 1.974100  | 1.10000 | 0.0067114000 | 1 |
| 7.735860  | -4.686940 | 0.536730  | 1.10000 | 0.0067114000 | 1 |
| 7.770000  | -6.686860 | 2.313700  | 1.10000 | 0.0067114000 | 1 |
| 8.475100  | -6.962060 | 0.597840  | 1.10000 | 0.0067114000 | 1 |
| 10.616200 | -7.364380 | 1.646400  | 1.10000 | 0.0067114000 | 1 |
| 10.207700 | -6.270170 | 3.069200  | 1.10000 | 0.0067114000 | 1 |
| 10.225100 | -8.664180 | 3.790300  | 1.10000 | 0.0067114000 | 1 |
| 8.532180  | -7.919610 | 4.005300  | 1.10000 | 0.0067114000 | 1 |
| 7.906970  | -9.150260 | 1.813600  | 1.10000 | 0.0067114000 | 1 |
| 9.686040  | -9.661330 | 1.653400  | 1.10000 | 0.0067114000 | 1 |
| 9.220820  | -10.80480 | 3.843800  | 1.10000 | 0.0067114000 | 1 |
| 7.476590  | -10.29720 | 3.695100  | 1.10000 | 0.0067114000 | 1 |
| 7.215840  | -12.45710 | 2.784300  | 1.10000 | 0.0067114000 | 1 |
| 7.704650  | -11.66840 | 1.300100  | 1.10000 | 0.0067114000 | 1 |
| 10.088500 | -12.28430 | 1.839400  | 1.10000 | 0.0067114000 | 1 |
| 9.505750  | -13.12190 | 3.527300  | 1.10000 | 0.0067114000 | 1 |
| 8.527860  | -14.88170 | 2.119800  | 1.10000 | 0.0067114000 | 1 |
| 9.018930  | -13.95670 | 0.538100  | 1.10000 | 0.0067114000 | 1 |
| 10.923500 | -14.86640 | 2.958500  | 1.10000 | 0.0067114000 | 1 |
| 10.623300 | -15.86680 | 1.535400  | 1.10000 | 0.0067114000 | 1 |
| 11.411800 | -14.01450 | 0.053579  | 1.10000 | 0.0067114000 | 1 |
| 11.964300 | -13.04910 | 1.421100  | 1.10000 | 0.0067114000 | 1 |
| 12.812300 | -14.66460 | 0.948310  | 1.10000 | 0.0067114000 | 1 |
| 11.540100 | -5.232320 | -1.867500 | 1.10000 | 0.0067114000 | 1 |
| 11.203500 | -4.263890 | -2.991900 | 1.10000 | 0.0067114000 | 1 |
| 12.477500 | -2.342320 | -1.783500 | 1.10000 | 0.0067114000 | 1 |
| 12.392000 | -3.194660 | -0.255730 | 1.10000 | 0.0067114000 | 1 |
| 13.512800 | -4.740500 | -2.744500 | 1.10000 | 0.0067114000 | 1 |
| 14.559500 | -3.515220 | -1.922800 | 1.10000 | 0.0067114000 | 1 |
| 13.285600 | -6.120320 | -0.753960 | 1.10000 | 0.0067114000 | 1 |
| 14.904900 | -5.679150 | -1.236600 | 1.10000 | 0.0067114000 | 1 |
| 13.444200 | -4.846800 | 1.426800  | 1.10000 | 0.0067114000 | 1 |
| 14.865400 | -6.029670 | 1.025800  | 1.10000 | 0.0067114000 | 1 |
| 16.392200 | -4.231010 | 0.202810  | 1.10000 | 0.0067114000 | 1 |
| 15.005800 | -3.151720 | 0.461540  | 1.10000 | 0.0067114000 | 1 |
| 17.013300 | -3.243600 | 2.130400  | 1.10000 | 0.0067114000 | 1 |
| 15.355800 | -3.330930 | 2.889800  | 1.10000 | 0.0067114000 | 1 |
| 16.997400 | -5.033210 | 4.102500  | 1.10000 | 0.0067114000 | 1 |
| 15.564300 | -5.736170 | 3.112900  | 1.10000 | 0.0067114000 | 1 |
| 17.466100 | -5.924290 | 1.198200  | 1.10000 | 0.0067114000 | 1 |
| 18.560000 | -5.373210 | 2.457000  | 1.10000 | 0.0067114000 | 1 |
| 17.245600 | -8.054110 | 2.198400  | 1.10000 | 0.0067114000 | 1 |
| 17.409800 | -7.456270 | 3.873100  | 1.10000 | 0.0067114000 | 1 |
| 19.785300 | -6.969200 | 3.646400  | 1.10000 | 0.0067114000 | 1 |
| 19.337500 | -8.747490 | 3.430400  | 1.10000 | 0.0067114000 | 1 |
| 20.892400 | -8.398090 | 1.245900  | 1.10000 | 0.0067114000 | 1 |
| 19.386900 | -8.127010 | 0.713990  | 1.10000 | 0.0067114000 | 1 |
| 20.394300 | -6.606500 | 1.221100  | 1.10000 | 0.0067114000 | 1 |
| 8.002220  | -5.192370 | -1.498700 | 1.10000 | 0.0067114000 | 1 |
| 8.626610  | -4.827540 | -3.038300 | 1.10000 | 0.0067114000 | 1 |
| 10.136900 | -6.705130 | -2.821800 | 1.10000 | 0.0067114000 | 1 |
| 10.250000 | -6.890200 | -1.161500 | 1.10000 | 0.0067114000 | 1 |
| 7.735710  | -7.734710 | -1.099500 | 1.10000 | 0.0067114000 | 1 |
| 7.777830  | -7.105050 | -2.939500 | 1.10000 | 0.0067114000 | 1 |
| 8.009190  | -9.549670 | -3.032400 | 1.10000 | 0.0067114000 | 1 |
| 9.504290  | -8.820220 | -3.519100 | 1.10000 | 0.0067114000 | 1 |
| 10.323200 | -9.025130 | -1.066900 | 1.10000 | 0.0067114000 | 1 |
| 8.927750  | -9.919600 | -0.776110 | 1.10000 | 0.0067114000 | 1 |
| 10.893400 | -11.50700 | -1.203900 | 1.10000 | 0.0067114000 | 1 |
| 9.545500  | -11.52890 | -2.449200 | 1.10000 | 0.0067114000 | 1 |
| 11.855700 | -11.70200 | -3.350800 | 1.10000 | 0.0067114000 | 1 |
| 10.958800 | -10.40330 | -4.012900 | 1.10000 | 0.0067114000 | 1 |
| 13.228300 | -9.634930 | -3.514700 | 1.10000 | 0.0067114000 | 1 |
| 11.976600 | -8.600040 | -2.680200 | 1.10000 | 0.0067114000 | 1 |
| 12.836700 | -9.617340 | -0.485470 | 1.10000 | 0.0067114000 | 1 |
| 13.631900 | -10.99320 | -1.243800 | 1.10000 | 0.0067114000 | 1 |
| 15.325300 | -9.503430 | -2.344400 | 1.10000 | 0.0067114000 | 1 |
| 14.573800 | -8.089620 | -1.615800 | 1.10000 | 0.0067114000 | 1 |
| 15.069800 | -9.056930 | 0.710900  | 1.10000 | 0.0067114000 | 1 |
| 16.586200 | -9.117740 | -0.186310 | 1.10000 | 0.0067114000 | 1 |
| 14.905100 | -11.32640 | 0.426710  | 1.10000 | 0.0067114000 | 1 |
| 16.630700 | -11.31170 | 0.798100  | 1.10000 | 0.0067114000 | 1 |
| 16.278200 | -11.57870 | -0.869780 | 1.10000 | 0.0067114000 | 1 |
| 9.360760  | -2.488020 | -2.241800 | 1.10000 | 0.0067114000 | 1 |
| 8.109870  | -2.892920 | -1.138300 | 1.10000 | 0.0067114000 | 1 |
| 9.591300  | -1.877080 | 0.730920  | 1.10000 | 0.0067114000 | 1 |
| 10.742100 | -1.404050 | -0.479960 | 1.10000 | 0.0067114000 | 1 |
| 8.954720  | -0.281748 | -1.703700 | 1.10000 | 0.0067114000 | 1 |
| 7.915920  | -0.573113 | -0.322470 | 1.10000 | 0.0067114000 | 1 |
| 9.851350  | 0.675906  | 1.104900  | 1.10000 | 0.0067114000 | 1 |

|           |          |           |         |              |   |
|-----------|----------|-----------|---------|--------------|---|
| 10.541300 | 1.045390 | -0.424580 | 1.10000 | 0.0067114000 | 1 |
| 9.283490  | 2.944610 | -0.015158 | 1.10000 | 0.0067114000 | 1 |
| 8.202780  | 2.021610 | -1.107100 | 1.10000 | 0.0067114000 | 1 |
| 7.052380  | 1.061760 | 1.215200  | 1.10000 | 0.0067114000 | 1 |
| 7.697980  | 2.563950 | 1.911100  | 1.10000 | 0.0067114000 | 1 |
| 6.418540  | 3.921720 | 0.265490  | 1.10000 | 0.0067114000 | 1 |
| 5.666100  | 2.334820 | -0.221540 | 1.10000 | 0.0067114000 | 1 |
| 4.259620  | 1.995340 | 1.584600  | 1.10000 | 0.0067114000 | 1 |
| 5.458930  | 2.451910 | 2.643900  | 1.10000 | 0.0067114000 | 1 |
| 5.009450  | 4.773470 | 2.411800  | 1.10000 | 0.0067114000 | 1 |
| 4.061920  | 4.792870 | 1.000900  | 1.10000 | 0.0067114000 | 1 |
| 2.287310  | 3.334320 | 2.483100  | 1.10000 | 0.0067114000 | 1 |
| 3.528930  | 3.437310 | 3.789700  | 1.10000 | 0.0067114000 | 1 |
| 3.469320  | 6.241280 | 2.995100  | 1.10000 | 0.0067114000 | 1 |
| 1.909410  | 5.720220 | 2.508800  | 1.10000 | 0.0067114000 | 1 |
| 1.979880  | 4.741030 | 5.276600  | 1.10000 | 0.0067114000 | 1 |
| 3.008440  | 6.132260 | 5.452900  | 1.10000 | 0.0067114000 | 1 |
| 1.333080  | 6.359490 | 4.627200  | 1.10000 | 0.0067114000 | 1 |

TAA\_multiTemperature\_candidate2.xlsx - Sheet #3

| x         | y         | z         | Radius  | Charge       | Atom |    |
|-----------|-----------|-----------|---------|--------------|------|----|
| 10.703900 | -6.105630 | -0.796950 | 1.55000 | 0.0067114000 |      | 14 |
| 11.809700 | -7.090090 | -1.098800 | 1.70000 | 0.0067114000 | 1    | 12 |
| 13.194300 | -6.836570 | -0.287470 | 1.70000 | 0.0067114000 |      | 12 |
| 14.144200 | -8.033550 | -0.665960 | 1.70000 | 0.0067114000 | 690  | 12 |
| 15.015400 | -8.006270 | -1.896800 | 1.70000 | 0.0067114000 |      | 12 |
| 16.383500 | -7.435310 | -1.691500 | 1.70000 | 0.0067114000 |      | 12 |
| 16.516300 | -5.963490 | -1.380600 | 1.70000 | 0.0067114000 |      | 12 |
| 17.740400 | -5.244390 | -1.967100 | 1.70000 | 0.0067114000 |      | 12 |
| 19.051000 | -5.886290 | -1.568300 | 1.70000 | 0.0067114000 |      | 12 |
| 19.048600 | -5.720160 | 0.016875  | 1.70000 | 0.0067114000 |      | 12 |
| 20.353100 | -5.921630 | 0.705390  | 1.70000 | 0.0067114000 |      | 12 |
| 21.253500 | -7.138240 | 0.323390  | 1.70000 | 0.0067114000 |      | 12 |
| 20.724300 | -8.524250 | 0.585410  | 1.70000 | 0.0067114000 |      | 12 |
| 9.554630  | -6.364670 | -1.803300 | 1.70000 | 0.0067114000 |      | 12 |
| 8.939120  | -7.778290 | -1.653300 | 1.70000 | 0.0067114000 |      | 12 |
| 7.544710  | -7.991510 | -2.544700 | 1.70000 | 0.0067114000 |      | 12 |
| 6.981130  | -9.462120 | -2.343300 | 1.70000 | 0.0067114000 |      | 12 |
| 6.803370  | -10.00710 | -0.772040 | 1.70000 | 0.0067114000 |      | 12 |
| 5.592430  | -9.339530 | -0.124760 | 1.70000 | 0.0067114000 |      | 12 |
| 5.731110  | -9.231320 | 1.549100  | 1.70000 | 0.0067114000 |      | 12 |
| 4.828310  | -8.147780 | 2.091700  | 1.70000 | 0.0067114000 |      | 12 |
| 3.315320  | -8.402210 | 2.161800  | 1.70000 | 0.0067114000 |      | 12 |
| 2.475780  | -7.591260 | 3.144200  | 1.70000 | 0.0067114000 |      | 12 |
| 2.720040  | -7.765150 | 4.593900  | 1.70000 | 0.0067114000 |      | 12 |
| 2.369430  | -6.619680 | 5.580300  | 1.70000 | 0.0067114000 |      | 12 |
| 10.269500 | -6.230000 | 0.584870  | 1.70000 | 0.0067114000 |      | 12 |
| 9.202750  | -5.308140 | 1.313000  | 1.70000 | 0.0067114000 |      | 12 |
| 8.751600  | -6.073080 | 2.482500  | 1.70000 | 0.0067114000 |      | 12 |
| 7.687370  | -5.232850 | 3.215700  | 1.70000 | 0.0067114000 |      | 12 |
| 7.070310  | -5.792580 | 4.465400  | 1.70000 | 0.0067114000 |      | 12 |
| 8.165580  | -6.092100 | 5.553300  | 1.70000 | 0.0067114000 |      | 12 |
| 8.582080  | -7.566050 | 5.879200  | 1.70000 | 0.0067114000 |      | 12 |
| 7.387870  | -8.422240 | 6.505100  | 1.70000 | 0.0067114000 |      | 12 |
| 6.391140  | -9.190050 | 5.693400  | 1.70000 | 0.0067114000 |      | 12 |
| 5.743620  | -10.46010 | 6.202600  | 1.70000 | 0.0067114000 |      | 12 |
| 4.859190  | -10.97410 | 5.061700  | 1.70000 | 0.0067114000 |      | 12 |
| 3.818240  | -11.99260 | 5.731000  | 1.70000 | 0.0067114000 |      | 12 |
| 11.123100 | -4.560680 | -0.824650 | 1.70000 | 0.0067114000 |      | 12 |
| 11.633800 | -3.957720 | -2.198800 | 1.70000 | 0.0067114000 |      | 12 |
| 11.651100 | -2.398540 | -2.178000 | 1.70000 | 0.0067114000 |      | 12 |
| 12.978200 | -1.761170 | -1.860800 | 1.70000 | 0.0067114000 |      | 12 |
| 12.754800 | -0.211492 | -2.141400 | 1.70000 | 0.0067114000 |      | 12 |
| 12.295300 | 0.544744  | -0.870460 | 1.70000 | 0.0067114000 |      | 12 |
| 12.304000 | 2.040380  | -0.910100 | 1.70000 | 0.0067114000 |      | 12 |
| 13.687000 | 2.760200  | -1.147400 | 1.70000 | 0.0067114000 |      | 12 |
| 13.727000 | 3.211870  | -2.596500 | 1.70000 | 0.0067114000 |      | 12 |
| 15.186500 | 3.468790  | -3.059300 | 1.70000 | 0.0067114000 |      | 12 |
| 15.216400 | 3.944560  | -4.561100 | 1.70000 | 0.0067114000 |      | 12 |
| 14.884900 | 5.401240  | -4.699200 | 1.70000 | 0.0067114000 |      | 12 |
| 11.359200 | -8.103260 | -1.115700 | 1.10000 | 0.0067114000 |      | 1  |
| 12.142600 | -6.949370 | -2.198100 | 1.10000 | 0.0067114000 |      | 1  |
| 13.666600 | -5.909270 | -0.640860 | 1.10000 | 0.0067114000 |      | 1  |
| 12.987900 | -6.728140 | 0.876340  | 1.10000 | 0.0067114000 |      | 1  |
| 14.915300 | -8.179880 | 0.189250  | 1.10000 | 0.0067114000 |      | 1  |
| 13.576000 | -8.963660 | -0.776290 | 1.10000 | 0.0067114000 |      | 1  |
| 15.265100 | -9.037220 | -2.136500 | 1.10000 | 0.0067114000 |      | 1  |
| 14.434000 | -7.724150 | -2.772500 | 1.10000 | 0.0067114000 |      | 1  |

|           |           |           |         |              |   |
|-----------|-----------|-----------|---------|--------------|---|
| 17.157200 | -7.932830 | -1.214700 | 1.10000 | 0.0067114000 | 1 |
| 16.787100 | -7.533700 | -2.719100 | 1.10000 | 0.0067114000 | 1 |
| 15.703700 | -5.368470 | -1.705800 | 1.10000 | 0.0067114000 | 1 |
| 16.476300 | -5.840670 | -0.287680 | 1.10000 | 0.0067114000 | 1 |
| 17.646000 | -5.391820 | -3.053300 | 1.10000 | 0.0067114000 | 1 |
| 17.691700 | -4.123840 | -1.739900 | 1.10000 | 0.0067114000 | 1 |
| 19.181700 | -6.907180 | -1.952300 | 1.10000 | 0.0067114000 | 1 |
| 19.889500 | -5.433300 | -2.091900 | 1.10000 | 0.0067114000 | 1 |
| 18.380400 | -4.877370 | 0.531190  | 1.10000 | 0.0067114000 | 1 |
| 18.552300 | -6.631110 | 0.392920  | 1.10000 | 0.0067114000 | 1 |
| 20.923700 | -4.930250 | 0.469650  | 1.10000 | 0.0067114000 | 1 |
| 20.103300 | -5.891270 | 1.807300  | 1.10000 | 0.0067114000 | 1 |
| 21.394700 | -7.001420 | -0.740200 | 1.10000 | 0.0067114000 | 1 |
| 22.290800 | -7.080640 | 0.764720  | 1.10000 | 0.0067114000 | 1 |
| 21.005900 | -8.763790 | 1.606200  | 1.10000 | 0.0067114000 | 1 |
| 19.621900 | -8.666720 | 0.385660  | 1.10000 | 0.0067114000 | 1 |
| 21.085300 | -9.258470 | -0.100200 | 1.10000 | 0.0067114000 | 1 |
| 8.799730  | -5.624640 | -1.582100 | 1.10000 | 0.0067114000 | 1 |
| 9.922350  | -6.222330 | -2.831600 | 1.10000 | 0.0067114000 | 1 |
| 9.711400  | -8.473510 | -2.053800 | 1.10000 | 0.0067114000 | 1 |
| 8.737260  | -7.998240 | -0.637460 | 1.10000 | 0.0067114000 | 1 |
| 6.747130  | -7.286000 | -2.174300 | 1.10000 | 0.0067114000 | 1 |
| 7.883720  | -7.925410 | -3.668400 | 1.10000 | 0.0067114000 | 1 |
| 6.020530  | -9.501830 | -2.824700 | 1.10000 | 0.0067114000 | 1 |
| 7.584360  | -10.13850 | -2.928300 | 1.10000 | 0.0067114000 | 1 |
| 6.690010  | -11.16210 | -0.843260 | 1.10000 | 0.0067114000 | 1 |
| 7.771310  | -9.919520 | -0.188180 | 1.10000 | 0.0067114000 | 1 |
| 5.790890  | -8.341930 | -0.519280 | 1.10000 | 0.0067114000 | 1 |
| 4.550020  | -9.862620 | -0.267190 | 1.10000 | 0.0067114000 | 1 |
| 5.553470  | -10.13400 | 2.237000  | 1.10000 | 0.0067114000 | 1 |
| 6.859650  | -9.187750 | 1.684900  | 1.10000 | 0.0067114000 | 1 |
| 5.316430  | -7.839240 | 3.119000  | 1.10000 | 0.0067114000 | 1 |
| 5.046280  | -7.268210 | 1.436900  | 1.10000 | 0.0067114000 | 1 |
| 3.008250  | -8.456540 | 1.105700  | 1.10000 | 0.0067114000 | 1 |
| 3.295960  | -9.455050 | 2.655600  | 1.10000 | 0.0067114000 | 1 |
| 1.427360  | -7.695770 | 2.820100  | 1.10000 | 0.0067114000 | 1 |
| 2.272260  | -6.521050 | 2.880800  | 1.10000 | 0.0067114000 | 1 |
| 2.664350  | -8.803930 | 4.956200  | 1.10000 | 0.0067114000 | 1 |
| 3.780560  | -7.417630 | 4.579200  | 1.10000 | 0.0067114000 | 1 |
| 2.485310  | -5.608290 | 5.059100  | 1.10000 | 0.0067114000 | 1 |
| 1.274430  | -6.814830 | 5.745400  | 1.10000 | 0.0067114000 | 1 |
| 2.947210  | -6.692710 | 6.528600  | 1.10000 | 0.0067114000 | 1 |
| 9.942060  | -7.325320 | 0.739740  | 1.10000 | 0.0067114000 | 1 |
| 11.170900 | -6.162440 | 1.228400  | 1.10000 | 0.0067114000 | 1 |
| 9.789840  | -4.390360 | 1.615700  | 1.10000 | 0.0067114000 | 1 |
| 8.279010  | -5.060390 | 0.744680  | 1.10000 | 0.0067114000 | 1 |
| 8.415350  | -7.050230 | 1.991900  | 1.10000 | 0.0067114000 | 1 |
| 9.488890  | -6.270600 | 3.271200  | 1.10000 | 0.0067114000 | 1 |
| 8.174870  | -4.279410 | 3.584300  | 1.10000 | 0.0067114000 | 1 |
| 6.920040  | -4.896620 | 2.480800  | 1.10000 | 0.0067114000 | 1 |
| 6.288030  | -5.121030 | 4.827200  | 1.10000 | 0.0067114000 | 1 |
| 6.477850  | -6.679510 | 4.265000  | 1.10000 | 0.0067114000 | 1 |
| 9.068380  | -5.575300 | 5.173500  | 1.10000 | 0.0067114000 | 1 |
| 7.800070  | -5.533710 | 6.441800  | 1.10000 | 0.0067114000 | 1 |
| 9.072840  | -7.993310 | 4.965300  | 1.10000 | 0.0067114000 | 1 |
| 9.395570  | -7.521520 | 6.673600  | 1.10000 | 0.0067114000 | 1 |
| 7.837720  | -9.333110 | 6.950400  | 1.10000 | 0.0067114000 | 1 |
| 7.035650  | -7.863320 | 7.421900  | 1.10000 | 0.0067114000 | 1 |
| 5.588390  | -8.449710 | 5.575800  | 1.10000 | 0.0067114000 | 1 |
| 6.983250  | -9.538040 | 4.762000  | 1.10000 | 0.0067114000 | 1 |
| 6.496470  | -11.17680 | 6.764400  | 1.10000 | 0.0067114000 | 1 |
| 5.117920  | -10.19150 | 7.035300  | 1.10000 | 0.0067114000 | 1 |
| 5.440090  | -11.64670 | 4.376900  | 1.10000 | 0.0067114000 | 1 |
| 4.272160  | -10.12480 | 4.496300  | 1.10000 | 0.0067114000 | 1 |
| 4.342110  | -12.76200 | 6.346900  | 1.10000 | 0.0067114000 | 1 |
| 3.224260  | -12.46810 | 5.004000  | 1.10000 | 0.0067114000 | 1 |
| 3.158360  | -11.77900 | 6.692200  | 1.10000 | 0.0067114000 | 1 |
| 10.270000 | -3.991200 | -0.567460 | 1.10000 | 0.0067114000 | 1 |
| 11.751700 | -4.428120 | 0.121010  | 1.10000 | 0.0067114000 | 1 |
| 12.584100 | -4.487280 | -2.477000 | 1.10000 | 0.0067114000 | 1 |
| 10.818800 | -4.301140 | -2.845300 | 1.10000 | 0.0067114000 | 1 |
| 11.157300 | -2.125920 | -3.188100 | 1.10000 | 0.0067114000 | 1 |
| 10.859200 | -2.146540 | -1.302100 | 1.10000 | 0.0067114000 | 1 |
| 13.323900 | -1.924080 | -0.801500 | 1.10000 | 0.0067114000 | 1 |
| 13.781500 | -2.041130 | -2.623500 | 1.10000 | 0.0067114000 | 1 |
| 13.832100 | 0.131644  | -2.246600 | 1.10000 | 0.0067114000 | 1 |
| 12.338900 | 0.143044  | -3.094000 | 1.10000 | 0.0067114000 | 1 |
| 11.269600 | 0.124644  | -0.675910 | 1.10000 | 0.0067114000 | 1 |
| 12.846400 | 0.065015  | 0.000800  | 1.10000 | 0.0067114000 | 1 |
| 11.708000 | 2.573770  | -1.673400 | 1.10000 | 0.0067114000 | 1 |

|           |          |           |         |              |   |
|-----------|----------|-----------|---------|--------------|---|
| 11.746300 | 2.457920 | -0.016151 | 1.10000 | 0.0067114000 | 1 |
| 13.693100 | 3.783610 | -0.480750 | 1.10000 | 0.0067114000 | 1 |
| 14.610000 | 2.378730 | -0.785970 | 1.10000 | 0.0067114000 | 1 |
| 13.170400 | 2.384230 | -3.225800 | 1.10000 | 0.0067114000 | 1 |
| 12.928900 | 3.899010 | -2.632800 | 1.10000 | 0.0067114000 | 1 |
| 15.706500 | 4.264320 | -2.528800 | 1.10000 | 0.0067114000 | 1 |
| 15.903200 | 2.578110 | -2.847300 | 1.10000 | 0.0067114000 | 1 |
| 16.246400 | 3.689980 | -4.938800 | 1.10000 | 0.0067114000 | 1 |
| 14.467200 | 3.398480 | -5.271000 | 1.10000 | 0.0067114000 | 1 |
| 15.479800 | 5.637210 | -5.655600 | 1.10000 | 0.0067114000 | 1 |
| 13.796500 | 5.664970 | -4.744100 | 1.10000 | 0.0067114000 | 1 |
| 15.362500 | 5.967870 | -3.827900 | 1.10000 | 0.0067114000 | 1 |

-----  
 IMoS.cla  
 -----

-----  
 excelfile Savefile Gas  
 /filefolder/TAA\_multiTemperature\_candidate2.xlsx /savefolder/TDDA\_SI.txt N2  
 -----

DNRCustomRange 0 0  
 interface 0  
 fromvalue 1  
 tovalue 3  
 red\_coef 1.13  
 Charge 1  
 radgas 1.5  
 Mgas 28  
 Pressure 101325  
 Mweight 690  
 Temperature 295  
 Polarizability 1.7  
 NrotationsPA 500  
 NrotationsEHSS 3  
 NrotationsTM 3  
 NgastotalEHSS 300000  
 NgastotalTM 300000  
 Accommodation 0  
 Timestep 100  
 Boxdomain 16  
 Diffuse? 1  
 reemvel 1  
 Other 0  
 Simplify 0  
 PA 0  
 PATSA 0  
 EHSS/DHSS 0  
 TM 0  
 TDHSS 0  
 qpol 1  
 LennardJones 1  
 DTM 0  
 HEN 4  
 TeffRange 295 296 297 298.5 300 302 305 308 312 315 320 325 330 340 350 365 380 420 470 530 600 680 770 870 980 1100  
 EsEc 1  
 ft\_vector 0.33333 0.28885 0.90371 0.90371 0.28885 -0.33333 -0.49486 -0.36437 -0.36437 -0.49486 -0.33333  
 t\_vector 0 0.1 0.2 0.3 0.4 0.5 0.6 0.7 0.8 0.9 1  
 seed 13  
 Numthreads 15  
 Repeatseed 1  
 DragRG 1

## Result of Multistructures Calculation for TDDA Salt:

IMoS v1.13 RESULTS FILE

File: TAA\_multiTemperature\_candidate2.xlsx Molecule: TDDA\_295\_27.txt

Number of atoms: 149  
 Molecular Weight: 690.00 Da  
 Total Charge: 1

The TM Method used is High Field  
 Performing TMLJ calculations for: TAA\_multiTemperature\_candidate2.xlsx and molecule TDDA\_295\_27.txt.

Results

Summary of ion calculations:  
 Ko represents reduced mobility!

| Ion                    | Teff<br>(K) | CCS<br>(A2) | E/n1<br>(Td) | E/n2<br>(Td) | E/n3<br>(Td) | E/n4<br>(Td) | <Ko1><br>(cm2/Vs) | <Ko2><br>(cm2/Vs) | <Ko3><br>(cm2/Vs) | <Ko4><br>(cm2/Vs) |        |
|------------------------|-------------|-------------|--------------|--------------|--------------|--------------|-------------------|-------------------|-------------------|-------------------|--------|
| TDDA_295_27.txt 295.00 | 295.00      |             | 312.0779     | 0.0000       | 0.0000       | 0.0000       | 0.0000            | 0.6657            | 0.6657            | 0.6657            | 0.6657 |
| TDDA_295_27.txt 296.00 | 296.00      |             | 311.6951     | 16.6949      | 16.6897      | 16.6897      | 16.6897           | 0.6654            | 0.6656            | 0.6656            | 0.6656 |
| TDDA_295_27.txt 297.00 | 297.00      |             | 311.4237     | 23.6294      | 23.6156      | 23.6155      | 23.6155           | 0.6649            | 0.6653            | 0.6653            | 0.6653 |
| TDDA_295_27.txt 298.50 | 298.50      |             | 311.0390     | 31.2988      | 31.2676      | 31.2675      | 31.2675           | 0.6640            | 0.6647            | 0.6647            | 0.6647 |
| TDDA_295_27.txt 300.00 | 300.00      |             | 310.6650     | 37.4580      | 37.4054      | 37.4051      | 37.4051           | 0.6631            | 0.6641            | 0.6641            | 0.6641 |
| TDDA_295_27.txt 302.00 | 302.00      |             | 310.1155     | 44.3898      | 44.3035      | 44.3028      | 44.3028           | 0.6621            | 0.6635            | 0.6635            | 0.6635 |
| TDDA_295_27.txt 305.00 | 305.00      |             | 309.1217     | 53.1480      | 53.0018      | 53.0002      | 53.0001           | 0.6610            | 0.6629            | 0.6629            | 0.6629 |
| TDDA_295_27.txt 308.00 | 308.00      |             | 308.3246     | 60.7383      | 60.5236      | 60.5207      | 60.5204           | 0.6594            | 0.6619            | 0.6619            | 0.6619 |
| TDDA_295_27.txt 312.00 | 312.00      |             | 307.2923     | 69.6724      | 69.3545      | 69.3491      | 69.3484           | 0.6574            | 0.6606            | 0.6606            | 0.6606 |
| TDDA_295_27.txt 315.00 | 315.00      |             | 306.5770     | 75.7560      | 75.3537      | 75.3458      | 75.3448           | 0.6558            | 0.6595            | 0.6595            | 0.6595 |
| TDDA_295_27.txt 320.00 | 320.00      |             | 305.3593     | 85.0283      | 84.4729      | 84.4597      | 84.4579           | 0.6532            | 0.6578            | 0.6579            | 0.6578 |
| TDDA_295_27.txt 325.00 | 325.00      |             | 304.1019     | 93.4822      | 92.7596      | 92.7395      | 92.7366           | 0.6509            | 0.6563            | 0.6564            | 0.6563 |
| TDDA_295_27.txt 330.00 | 330.00      |             | 302.7850     | 101.3054     | 100.4019     | 100.3732     | 100.3688          | 0.6487            | 0.6550            | 0.6551            | 0.6551 |
| TDDA_295_27.txt 340.00 | 340.00      |             | 300.5196     | 115.7246     | 114.4338     | 114.3836     | 114.3751          | 0.6439            | 0.6518            | 0.6520            | 0.6519 |
| TDDA_295_27.txt 350.00 | 350.00      |             | 298.3634     | 128.8748     | 127.1631     | 127.0857     | 127.0713          | 0.6393            | 0.6486            | 0.6489            | 0.6488 |
| TDDA_295_27.txt 365.00 | 365.00      |             | 295.1132     | 146.8559     | 144.4541     | 144.3240     | 144.2974          | 0.6329            | 0.6444            | 0.6449            | 0.6447 |
| TDDA_295_27.txt 380.00 | 380.00      |             | 292.0231     | 163.3901     | 160.2389     | 160.0426     | 159.9992          | 0.6268            | 0.6404            | 0.6412            | 0.6409 |

Dispersion plot

alpha is obtained by dividing Mobility by zero field Mobility (not reduced)

| Ion                      | Ed<br>(Td) | Ec<br>(Td) | alpha<br>(Td) | E/n<br>(Td) |
|--------------------------|------------|------------|---------------|-------------|
| TDDA_295_27.txt 0.0000   | 0.0000     | 0.0000     | 0.0000        | 0.0000      |
| TDDA_295_27.txt 16.6897  | 0.0006     | -0.0002    | 16.6897       |             |
| TDDA_295_27.txt 23.6155  | 0.0023     | -0.0007    | 23.6155       |             |
| TDDA_295_27.txt 31.2675  | 0.0062     | -0.0015    | 31.2675       |             |
| TDDA_295_27.txt 37.4051  | 0.0112     | -0.0024    | 37.4051       |             |
| TDDA_295_27.txt 44.3028  | 0.0187     | -0.0034    | 44.3028       |             |
| TDDA_295_27.txt 53.0001  | 0.0282     | -0.0043    | 53.0001       |             |
| TDDA_295_27.txt 60.5204  | 0.0399     | -0.0057    | 60.5204       |             |
| TDDA_295_27.txt 69.3484  | 0.0592     | -0.0077    | 69.3484       |             |
| TDDA_295_27.txt 75.3448  | 0.0762     | -0.0093    | 75.3448       |             |
| TDDA_295_27.txt 84.4579  | 0.1082     | -0.0118    | 84.4579       |             |
| TDDA_295_27.txt 92.7366  | 0.1437     | -0.0141    | 92.7366       |             |
| TDDA_295_27.txt 100.3688 | 0.1812     | -0.0160    | 100.3688      |             |
| TDDA_295_27.txt 114.3751 | 0.2695     | -0.0208    | 114.3751      |             |
| TDDA_295_27.txt 127.0713 | 0.3691     | -0.0254    | 127.0713      |             |
| TDDA_295_27.txt 144.2974 | 0.5272     | -0.0316    | 144.2974      |             |
| TDDA_295_27.txt 159.9992 | 0.6902     | -0.0373    | 159.9992      |             |

LJTM calculation parameters:

Number of loops (itn) = 1  
 Number of velocity points (inp) = 5  
 Number of random rotations and impact parameters (imp) = 180000  
 Total Trajectories = 900000

Max time step = 1.00e-13 second  
 Min time step = 1.00e-16 second  
 Time step corrector = 100.00

Ratio of potential energy to kinetic energy at the starting of Traj (sw1) = 0.001000  
 Maximum value of [1-cosX] at b\_max (emin) = 0.000100  
 Seed = 13  
 Time taken is a mere 439.1385 seconds

File: TAA\_multiTemperature\_candidate2.xlsx      Molecule: TDDA\_390\_25.txt

Number of atoms: 149  
 Molecular Weight: 690.00 Da  
 Total Charge: 1

The TM Method used is High Field  
 Performing TMLJ calculations for: TAA\_multiTemperature\_candidate2.xlsx and molecule TDDA\_390\_25.txt.

Results

Summary of ion calculations:  
 Ko represents reduced mobility!

| Ion | Teff | CCS | E/n1 | E/n2 | E/n3 | E/n4 | <Ko1> | <Ko2> | <Ko3> | <Ko4> |
|-----|------|-----|------|------|------|------|-------|-------|-------|-------|
|-----|------|-----|------|------|------|------|-------|-------|-------|-------|



| (K)             | (A2)   | (Td)     | (Td)     | (Td)     | (Td)     | (cm2/Vs) | (cm2/Vs) | (cm2/Vs) | (cm2/Vs) |        |
|-----------------|--------|----------|----------|----------|----------|----------|----------|----------|----------|--------|
| TDDA_390_25.txt | 295.00 | 318.8685 | 0.0000   | 0.0000   | 0.0000   | 0.0000   | 0.6515   | 0.6515   | 0.6515   | 0.6515 |
| TDDA_390_25.txt | 296.00 | 318.5872 | 17.0640  | 17.0587  | 17.0587  | 17.0587  | 0.6510   | 0.6512   | 0.6512   | 0.6512 |
| TDDA_390_25.txt | 297.00 | 318.3619 | 24.1558  | 24.1415  | 24.1415  | 24.1415  | 0.6504   | 0.6508   | 0.6508   | 0.6508 |
| TDDA_390_25.txt | 298.50 | 317.9453 | 31.9938  | 31.9615  | 31.9614  | 31.9614  | 0.6496   | 0.6503   | 0.6503   | 0.6503 |
| TDDA_390_25.txt | 300.00 | 317.4760 | 38.2793  | 38.2248  | 38.2245  | 38.2245  | 0.6489   | 0.6499   | 0.6499   | 0.6499 |
| TDDA_390_25.txt | 302.00 | 316.8498 | 45.3538  | 45.2644  | 45.2637  | 45.2637  | 0.6480   | 0.6494   | 0.6494   | 0.6494 |
| TDDA_390_25.txt | 305.00 | 315.9245 | 54.3176  | 54.1662  | 54.1646  | 54.1646  | 0.6467   | 0.6486   | 0.6486   | 0.6486 |
| TDDA_390_25.txt | 308.00 | 315.1493 | 62.0827  | 61.8602  | 61.8574  | 61.8570  | 0.6452   | 0.6476   | 0.6476   | 0.6476 |
| TDDA_390_25.txt | 312.00 | 313.9666 | 71.1856  | 70.8557  | 70.8503  | 70.8496  | 0.6434   | 0.6466   | 0.6466   | 0.6466 |
| TDDA_390_25.txt | 315.00 | 313.1509 | 77.3804  | 76.9622  | 76.9541  | 76.9531  | 0.6420   | 0.6457   | 0.6458   | 0.6457 |
| TDDA_390_25.txt | 320.00 | 311.7680 | 86.8128  | 86.2347  | 86.2211  | 86.2193  | 0.6398   | 0.6444   | 0.6444   | 0.6444 |
| TDDA_390_25.txt | 325.00 | 310.7306 | 95.5198  | 94.7696  | 94.7491  | 94.7461  | 0.6370   | 0.6424   | 0.6425   | 0.6424 |
| TDDA_390_25.txt | 330.00 | 309.4283 | 103.5281 | 102.5907 | 102.5615 | 102.5569 | 0.6348   | 0.6410   | 0.6412   | 0.6411 |
| TDDA_390_25.txt | 340.00 | 307.0109 | 118.2243 | 116.8823 | 116.8311 | 116.8223 | 0.6303   | 0.6381   | 0.6384   | 0.6382 |
| TDDA_390_25.txt | 350.00 | 304.6815 | 131.6039 | 129.8191 | 129.7394 | 129.7244 | 0.6260   | 0.6353   | 0.6357   | 0.6355 |
| TDDA_390_25.txt | 365.00 | 301.3851 | 149.9770 | 147.4703 | 147.3361 | 147.3084 | 0.6197   | 0.6312   | 0.6318   | 0.6315 |
| TDDA_390_25.txt | 380.00 | 298.3437 | 166.9266 | 163.6433 | 163.4413 | 163.3963 | 0.6136   | 0.6270   | 0.6278   | 0.6276 |
| TDDA_390_25.txt | 390.00 | 296.5243 | 177.6894 | 173.8656 | 173.6121 | 173.5530 | 0.6094   | 0.6241   | 0.6251   | 0.6247 |
| TDDA_390_25.txt | 420.00 | 290.9305 | 207.5277 | 201.9456 | 201.5008 | 201.3859 | 0.5985   | 0.6169   | 0.6184   | 0.6180 |
| TDDA_390_25.txt | 470.00 | 283.2816 | 252.9260 | 244.1529 | 243.2968 | 243.0487 | 0.5810   | 0.6045   | 0.6071   | 0.6066 |

Dispersion plot

alpha is obtained by dividing Mobility by zero field Mobility (not reduced)

| Ion             | Ed<br>(Td) | Ec<br>(Td) | alpha<br>(Td) | E/n<br>(Td) |
|-----------------|------------|------------|---------------|-------------|
| TDDA_390_25.txt | 0.0000     | 0.0000     | 0.0000        | 0.0000      |
| TDDA_390_25.txt | 17.0587    | 0.0013     | -0.0005       | 17.0587     |
| TDDA_390_25.txt | 24.1415    | 0.0038     | -0.0012       | 24.1415     |
| TDDA_390_25.txt | 31.9614    | 0.0078     | -0.0020       | 31.9614     |
| TDDA_390_25.txt | 38.2245    | 0.0116     | -0.0025       | 38.2245     |
| TDDA_390_25.txt | 45.2637    | 0.0168     | -0.0033       | 45.2637     |
| TDDA_390_25.txt | 54.1645    | 0.0254     | -0.0045       | 54.1645     |
| TDDA_390_25.txt | 61.8570    | 0.0380     | -0.0060       | 61.8570     |
| TDDA_390_25.txt | 70.8496    | 0.0563     | -0.0076       | 70.8496     |
| TDDA_390_25.txt | 76.9531    | 0.0723     | -0.0089       | 76.9531     |
| TDDA_390_25.txt | 86.2193    | 0.1012     | -0.0110       | 86.2193     |
| TDDA_390_25.txt | 94.7461    | 0.1408     | -0.0140       | 94.7461     |
| TDDA_390_25.txt | 102.5569   | 0.1817     | -0.0160       | 102.5569    |
| TDDA_390_25.txt | 116.8223   | 0.2676     | -0.0204       | 116.8223    |
| TDDA_390_25.txt | 129.7244   | 0.3607     | -0.0246       | 129.7244    |
| TDDA_390_25.txt | 147.3084   | 0.5180     | -0.0307       | 147.3084    |
| TDDA_390_25.txt | 163.3963   | 0.6916     | -0.0368       | 163.3963    |
| TDDA_390_25.txt | 173.5530   | 0.8214     | -0.0411       | 173.5530    |
| TDDA_390_25.txt | 201.3859   | 1.2004     | -0.0515       | 201.3859    |
| TDDA_390_25.txt | 243.0487   | 1.9252     | -0.0690       | 243.0487    |

LJTM calculation parameters:

Number of loops (itn) = 1  
Number of velocity points (inp) = 5  
Number of random rotations and impact parameters (imp) = 180000  
Total Trajectories = 900000

Max time step = 1.00e-13 second  
Min time step = 1.00e-16 second  
Time step corrector = 100.00

Ratio of potential energy to kinetic energy at the starting of Traj (sw1) = 0.001000  
Maximum value of [1-cosX] at b\_max (cmin) = 0.000100  
Seed = 13  
Time taken is a mere 515.5814 seconds

File: TAA\_multiTemperature\_candidate2.xlsx      Molecule: TDDA\_480\_18.txt

Number of atoms: 149  
Molecular Weight: 690.00 Da  
Total Charge: 1

The TM Method used is High Field  
Performing TMLJ calculations for: TAA\_multiTemperature\_candidate2.xlsx and molecule TDDA\_480\_18.txt.

Results

Summary of ion calculations:

Ko represents reduced mobility!

| Ion             | Teff<br>(K) | CCS<br>(A2) | E/n1<br>(Td) | E/n2<br>(Td) | E/n3<br>(Td) | E/n4<br>(Td) | <Ko1><br>(cm2/Vs) | <Ko2><br>(cm2/Vs) | <Ko3><br>(cm2/Vs) | <Ko4><br>(cm2/Vs) |
|-----------------|-------------|-------------|--------------|--------------|--------------|--------------|-------------------|-------------------|-------------------|-------------------|
| TDDA_480_18.txt | 295.00      | 333.5457    | 0.0000       | 0.0000       | 0.0000       | 0.0000       | 0.0000            | 0.6229            | 0.6229            | 0.6229            |
| TDDA_480_18.txt | 420.00      | 304.4636    | 217.1812     | 211.2444     | 210.7505     | 210.6233     | 0.5719            | 0.5898            | 0.5914            | 0.5909            |
| TDDA_480_18.txt | 470.00      | 296.8104    | 265.0052     | 255.7122     | 254.7695     | 254.4972     | 0.5545            | 0.5773            | 0.5799            | 0.5794            |
| TDDA_480_18.txt | 480.00      | 295.3888    | 274.0361     | 264.0365     | 262.9889     | 262.6808     | 0.5514            | 0.5750            | 0.5778            | 0.5773            |
| TDDA_480_18.txt | 530.00      | 288.9906    | 317.5139     | 303.8326     | 302.1982     | 301.6808     | 0.5363            | 0.5640            | 0.5679            | 0.5674            |
| TDDA_480_18.txt | 600.00      | 281.6128    | 375.0466     | 355.9210     | 353.3149     | 352.4283     | 0.5173            | 0.5494            | 0.5549            | 0.5546            |
| TDDA_480_18.txt | 680.00      | 275.0276    | 438.0952     | 412.5102     | 408.6338     | 407.2366     | 0.4975            | 0.5335            | 0.5407            | 0.5406            |
| TDDA_480_18.txt | 770.00      | 268.9201    | 506.3172     | 473.2116     | 467.7380     | 465.6684     | 0.4782            | 0.5175            | 0.5262            | 0.5266            |
| TDDA_480_18.txt | 870.00      | 263.5271    | 580.2646     | 538.6434     | 531.2510     | 528.3431     | 0.4591            | 0.5010            | 0.5113            | 0.5122            |
| TDDA_480_18.txt | 980.00      | 258.7479    | 659.9976     | 608.9260     | 599.3188     | 595.4165     | 0.4405            | 0.4844            | 0.4961            | 0.4975            |
| TDDA_480_18.txt | 1100.00     | 254.4165    | 745.3269     | 683.8427     | 671.6956     | 666.6222     | 0.4229            | 0.4683            | 0.4811            | 0.4832            |

Dispersion plot

alpha is obtained by dividing Mobility by zero field Mobility (not reduced)

| Ion             | Ed<br>(Td) | Ec<br>(Td) | alpha<br>(Td) | E/n<br>(Td) |
|-----------------|------------|------------|---------------|-------------|
| TDDA_480_18.txt | 0.0000     | 0.0000     | 0.0000        | 0.0000      |
| TDDA_480_18.txt | 210.6233   | 1.3346     | -0.0513       | 210.6233    |
| TDDA_480_18.txt | 254.4972   | 2.1909     | -0.0698       | 254.4972    |
| TDDA_480_18.txt | 262.6808   | 2.3692     | -0.0732       | 262.6808    |
| TDDA_480_18.txt | 301.6808   | 3.2992     | -0.0891       | 301.6808    |
| TDDA_480_18.txt | 352.4283   | 4.7064     | -0.1097       | 352.4283    |
| TDDA_480_18.txt | 407.2366   | 6.4951     | -0.1321       | 407.2366    |
| TDDA_480_18.txt | 465.6684   | 8.6608     | -0.1545       | 465.6684    |
| TDDA_480_18.txt | 528.3431   | 11.2949    | -0.1777       | 528.3431    |
| TDDA_480_18.txt | 595.4165   | 14.4777    | -0.2012       | 595.4165    |
| TDDA_480_18.txt | 666.6222   | 18.1991    | -0.2243       | 666.6222    |

LJTM calculation parameters:

Number of loops (itn) = 1  
 Number of velocity points (inp) = 5  
 Number of random rotations and impact parameters (imp) = 180000  
 Total Trajectories = 900000

Max time step = 1.00e-13 second  
 Min time step = 1.00e-16 second  
 Time step corrector = 100.00

Ratio of potential energy to kinetic energy at the starting of Traj (sw1) = 0.001000  
 Maximum value of [1-cosX] at b\_max (cmin) = 0.000100

Seed = 13

MULTI STRUCTURE Dispersion plot

alpha is obtained by dividing Mobility by zero field Mobility (not reduced)

| Teff<br>(Td) | Ed<br>(Td) | Ec<br>(Td) | alpha<br>(Td) | Kho<br>(Td) |
|--------------|------------|------------|---------------|-------------|
| 295          | 0.0000     | 0.0000     | 0.0000        | 0.6657      |
| 296          | 16.6936    | 0.0010     | -0.0004       | 0.6655      |
| 297          | 23.6266    | 0.0035     | -0.0011       | 0.6650      |
| 298.5        | 31.2931    | 0.0090     | -0.0023       | 0.6642      |
| 300          | 37.4482    | 0.0160     | -0.0035       | 0.6634      |
| 302          | 44.3736    | 0.0264     | -0.0049       | 0.6624      |
| 305          | 53.1226    | 0.0414     | -0.0065       | 0.6614      |
| 308          | 60.7033    | 0.0599     | -0.0087       | 0.6600      |
| 312          | 69.6171    | 0.0889     | -0.0114       | 0.6581      |
| 315          | 75.6834    | 0.1140     | -0.0137       | 0.6566      |
| 320          | 84.9214    | 0.1602     | -0.0171       | 0.6543      |
| 325          | 93.3712    | 0.2137     | -0.0207       | 0.6519      |
| 330          | 101.1749   | 0.2711     | -0.0237       | 0.6499      |
| 340          | 115.5343   | 0.4015     | -0.0305       | 0.6454      |
| 350          | 128.6073   | 0.5463     | -0.0370       | 0.6411      |
| 365          | 146.5160   | 0.7842     | -0.0461       | 0.6350      |
| 380          | 163.0387   | 1.0454     | -0.0552       | 0.6290      |
| 390          | 173.5530   | 1.2391     | -0.0616       | 0.6247      |
| 420          | 204.4650   | 2.0151     | -0.0853       | 0.6090      |
| 470          | 253.2251   | 3.8270     | -0.1252       | 0.5824      |
| 480          | 262.6808   | 4.2475     | -0.1328       | 0.5773      |
| 530          | 301.6808   | 5.7576     | -0.1477       | 0.5674      |
| 600          | 352.4283   | 7.6822     | -0.1670       | 0.5546      |
| 680          | 407.2366   | 9.7929     | -0.1880       | 0.5406      |
| 770          | 465.6684   | 11.8929    | -0.2090       | 0.5266      |

|      |          |         |         |        |
|------|----------|---------|---------|--------|
| 870  | 528.3431 | 14.0293 | -0.2306 | 0.5122 |
| 980  | 595.4165 | 16.3395 | -0.2526 | 0.4975 |
| 1100 | 666.6222 | 19.7103 | -0.2742 | 0.4832 |

Time taken is a mere 257.9334 seconds

PARAMETERS USED:

Gas: N2  
 Reduction Coef: 1.130  
 Molecular mass of Gas: 28.00 Da  
 Alpha polarization: 1.70 A3  
 Radius of gas: 1.50 A  
 Temperature: 295 K  
 Pressure: 101325 Pa

Lennard Jones parameters for basic

Atom eps(J\*10<sup>-21</sup>) sigma(A)

|       |             |             |
|-------|-------------|-------------|
| H     | 0.480600000 | 2.300000000 |
| C     | 0.744930000 | 3.500000000 |
| O     | 0.688860000 | 3.500000000 |
| N     | 0.929160000 | 4.200000000 |
| F     | 0.192240000 | 3.400000000 |
| Cs    | 0.581400000 | 4.200810000 |
| Na    | 0.416776320 | 3.500000000 |
| Cl    | 0.416776320 | 3.500000000 |
| I     | 0.630000000 | 5.400000000 |
| K     | 0.416776320 | 3.500000000 |
| Rb    | 0.416776320 | 3.500000000 |
| P     | 0.416776320 | 3.500000000 |
| Ca    | 0.416776320 | 3.500000000 |
| Li    | 0.416776320 | 3.500000000 |
| S     | 0.416776320 | 3.500000000 |
| Other | 0.416776320 | 3.500000000 |

SUMMARY OF HIGH FIELD CALCULATIONS

FAIMS/DMS Dispersion field curve used

| ft<br>(AU)  | t<br>(s) |
|-------------|----------|
| 0.33333000  | 0.0000   |
| 0.28885000  | 0.1000   |
| 0.90371000  | 0.2000   |
| 0.90371000  | 0.3000   |
| 0.28885000  | 0.4000   |
| -0.33333000 | 0.5000   |
| -0.49486000 | 0.6000   |
| -0.36437000 | 0.7000   |
| -0.36437000 | 0.8000   |
| -0.49486000 | 0.9000   |
| -0.33333000 | 1.0000   |

| Ion                    | Teff<br>(K) | CCS<br>(A2) | E/n1<br>(Td) | E/n2<br>(Td) | E/n3<br>(Td) | E/n4<br>(Td) | <Ko1><br>(cm2/Vs) | <Ko2><br>(cm2/Vs) | <Ko3><br>(cm2/Vs) | <Ko4><br>(cm2/Vs) |        |
|------------------------|-------------|-------------|--------------|--------------|--------------|--------------|-------------------|-------------------|-------------------|-------------------|--------|
| TDDA_295_27.txt 295.00 | 312.0779    | 0.0000      | 0.0000       | 0.0000       | 0.0000       | 0.0000       | 0.0000            | 0.6657            | 0.6657            | 0.6657            | 0.6657 |
| TDDA_295_27.txt 296.00 | 311.6951    | 16.6949     | 16.6897      | 16.6897      | 16.6897      | 16.6897      | 16.6897           | 0.6654            | 0.6656            | 0.6656            | 0.6656 |
| TDDA_295_27.txt 297.00 | 311.4237    | 23.6294     | 23.6156      | 23.6156      | 23.6155      | 23.6155      | 0.6649            | 0.6653            | 0.6653            | 0.6653            | 0.6653 |
| TDDA_295_27.txt 298.50 | 311.0390    | 31.2988     | 31.2676      | 31.2676      | 31.2675      | 31.2675      | 0.6640            | 0.6647            | 0.6647            | 0.6647            | 0.6647 |
| TDDA_295_27.txt 300.00 | 310.6650    | 37.4580     | 37.4054      | 37.4054      | 37.4051      | 37.4051      | 0.6631            | 0.6641            | 0.6641            | 0.6641            | 0.6641 |
| TDDA_295_27.txt 302.00 | 310.1155    | 44.3898     | 44.3035      | 44.3028      | 44.3028      | 44.3028      | 0.6621            | 0.6635            | 0.6635            | 0.6635            | 0.6635 |
| TDDA_295_27.txt 305.00 | 309.1217    | 53.1480     | 53.0018      | 53.0002      | 53.0001      | 53.0001      | 0.6610            | 0.6629            | 0.6629            | 0.6629            | 0.6629 |
| TDDA_295_27.txt 308.00 | 308.3246    | 60.7383     | 60.5236      | 60.5207      | 60.5204      | 60.5204      | 0.6594            | 0.6619            | 0.6619            | 0.6619            | 0.6619 |
| TDDA_295_27.txt 312.00 | 307.2923    | 69.6724     | 69.3545      | 69.3491      | 69.3484      | 69.3484      | 0.6574            | 0.6606            | 0.6606            | 0.6606            | 0.6606 |
| TDDA_295_27.txt 315.00 | 306.5770    | 75.7560     | 75.3537      | 75.3458      | 75.3458      | 75.3458      | 0.6558            | 0.6595            | 0.6595            | 0.6595            | 0.6595 |
| TDDA_295_27.txt 320.00 | 305.3593    | 85.0283     | 84.4729      | 84.4597      | 84.4597      | 84.4597      | 0.6532            | 0.6578            | 0.6578            | 0.6578            | 0.6578 |
| TDDA_295_27.txt 325.00 | 304.1019    | 93.4822     | 92.7596      | 92.7395      | 92.7366      | 92.7366      | 0.6509            | 0.6563            | 0.6564            | 0.6564            | 0.6563 |
| TDDA_295_27.txt 330.00 | 302.7850    | 101.3054    | 100.4019     | 100.3732     | 100.3688     | 100.3688     | 0.6487            | 0.6550            | 0.6551            | 0.6551            | 0.6551 |
| TDDA_295_27.txt 340.00 | 300.5196    | 115.7246    | 114.4338     | 114.3836     | 114.3751     | 114.3751     | 0.6439            | 0.6518            | 0.6520            | 0.6519            | 0.6519 |
| TDDA_295_27.txt 350.00 | 298.3634    | 128.8748    | 127.1631     | 127.0857     | 127.0713     | 127.0713     | 0.6393            | 0.6486            | 0.6489            | 0.6488            | 0.6488 |
| TDDA_295_27.txt 365.00 | 295.1132    | 146.8559    | 144.4541     | 144.3240     | 144.2974     | 144.2974     | 0.6329            | 0.6444            | 0.6444            | 0.6444            | 0.6447 |
| TDDA_295_27.txt 380.00 | 292.0231    | 163.3901    | 160.2389     | 160.0426     | 159.9992     | 159.9992     | 0.6268            | 0.6404            | 0.6412            | 0.6409            | 0.6409 |
| TDDA_390_25.txt 295.00 | 318.8685    | 0.0000      | 0.0000       | 0.0000       | 0.0000       | 0.0000       | 0.6515            | 0.6515            | 0.6515            | 0.6515            | 0.6515 |
| TDDA_390_25.txt 296.00 | 318.5872    | 17.0640     | 17.0587      | 17.0587      | 17.0587      | 17.0587      | 0.6510            | 0.6512            | 0.6512            | 0.6512            | 0.6512 |
| TDDA_390_25.txt 297.00 | 318.3619    | 24.1558     | 24.1415      | 24.1415      | 24.1415      | 24.1415      | 0.6504            | 0.6508            | 0.6508            | 0.6508            | 0.6508 |
| TDDA_390_25.txt 298.50 | 317.9453    | 31.9938     | 31.9615      | 31.9615      | 31.9614      | 31.9614      | 0.6496            | 0.6503            | 0.6503            | 0.6503            | 0.6503 |
| TDDA_390_25.txt 300.00 | 317.4760    | 38.2793     | 38.2248      | 38.2245      | 38.2245      | 38.2245      | 0.6489            | 0.6499            | 0.6499            | 0.6499            | 0.6499 |

|                         |          |          |          |          |          |        |        |        |        |
|-------------------------|----------|----------|----------|----------|----------|--------|--------|--------|--------|
| TDDA_390_25.txt 302.00  | 316.8498 | 45.3538  | 45.2644  | 45.2637  | 45.2637  | 0.6480 | 0.6494 | 0.6494 | 0.6494 |
| TDDA_390_25.txt 305.00  | 315.9245 | 54.3176  | 54.1662  | 54.1646  | 54.1645  | 0.6467 | 0.6486 | 0.6486 | 0.6486 |
| TDDA_390_25.txt 308.00  | 315.1493 | 62.0827  | 61.8602  | 61.8574  | 61.8570  | 0.6452 | 0.6476 | 0.6476 | 0.6476 |
| TDDA_390_25.txt 312.00  | 313.9666 | 71.1856  | 70.8557  | 70.8503  | 70.8496  | 0.6434 | 0.6466 | 0.6466 | 0.6466 |
| TDDA_390_25.txt 315.00  | 313.1509 | 77.3804  | 76.9622  | 76.9541  | 76.9531  | 0.6420 | 0.6457 | 0.6458 | 0.6457 |
| TDDA_390_25.txt 320.00  | 311.7680 | 86.8128  | 86.2347  | 86.2211  | 86.2193  | 0.6398 | 0.6444 | 0.6444 | 0.6444 |
| TDDA_390_25.txt 325.00  | 310.7306 | 95.5198  | 94.7696  | 94.7491  | 94.7461  | 0.6370 | 0.6424 | 0.6425 | 0.6424 |
| TDDA_390_25.txt 330.00  | 309.4283 | 103.5281 | 102.5907 | 102.5615 | 102.5569 | 0.6348 | 0.6410 | 0.6412 | 0.6411 |
| TDDA_390_25.txt 340.00  | 307.0109 | 118.2243 | 116.8823 | 116.8311 | 116.8223 | 0.6303 | 0.6381 | 0.6384 | 0.6382 |
| TDDA_390_25.txt 350.00  | 304.6815 | 131.6039 | 129.8191 | 129.7394 | 129.7244 | 0.6260 | 0.6353 | 0.6357 | 0.6355 |
| TDDA_390_25.txt 365.00  | 301.3851 | 149.9770 | 147.4703 | 147.3361 | 147.3084 | 0.6197 | 0.6312 | 0.6318 | 0.6315 |
| TDDA_390_25.txt 380.00  | 298.3437 | 166.9266 | 163.6433 | 163.4413 | 163.3963 | 0.6136 | 0.6270 | 0.6278 | 0.6276 |
| TDDA_390_25.txt 390.00  | 296.5243 | 177.6894 | 173.8656 | 173.6121 | 173.5530 | 0.6094 | 0.6241 | 0.6251 | 0.6247 |
| TDDA_390_25.txt 420.00  | 290.9305 | 207.5277 | 201.9456 | 201.5008 | 201.3859 | 0.5985 | 0.6169 | 0.6184 | 0.6180 |
| TDDA_390_25.txt 470.00  | 283.2816 | 252.9260 | 244.1529 | 243.2968 | 243.0487 | 0.5810 | 0.6045 | 0.6071 | 0.6066 |
| TDDA_480_18.txt 295.00  | 333.5457 | 0.0000   | 0.0000   | 0.0000   | 0.0000   | 0.6229 | 0.6229 | 0.6229 | 0.6229 |
| TDDA_480_18.txt 420.00  | 304.4636 | 217.1812 | 211.2444 | 210.7505 | 210.6233 | 0.5719 | 0.5898 | 0.5914 | 0.5909 |
| TDDA_480_18.txt 470.00  | 296.8104 | 265.0052 | 255.7122 | 254.7695 | 254.4972 | 0.5545 | 0.5773 | 0.5799 | 0.5794 |
| TDDA_480_18.txt 480.00  | 295.3888 | 274.0361 | 264.0365 | 262.9889 | 262.6808 | 0.5514 | 0.5750 | 0.5778 | 0.5773 |
| TDDA_480_18.txt 530.00  | 288.9906 | 317.5139 | 303.8326 | 302.1982 | 301.6808 | 0.5363 | 0.5640 | 0.5679 | 0.5674 |
| TDDA_480_18.txt 600.00  | 281.6128 | 375.0466 | 355.9210 | 353.3149 | 352.4283 | 0.5173 | 0.5494 | 0.5549 | 0.5546 |
| TDDA_480_18.txt 680.00  | 275.0276 | 438.0952 | 412.5102 | 408.6338 | 407.2366 | 0.4975 | 0.5335 | 0.5407 | 0.5406 |
| TDDA_480_18.txt 770.00  | 268.9201 | 506.3172 | 473.2116 | 467.7380 | 465.6684 | 0.4782 | 0.5175 | 0.5262 | 0.5266 |
| TDDA_480_18.txt 870.00  | 263.5271 | 580.2646 | 538.6434 | 531.2510 | 528.3431 | 0.4591 | 0.5010 | 0.5113 | 0.5122 |
| TDDA_480_18.txt 980.00  | 258.7479 | 659.9976 | 608.9260 | 599.3188 | 595.4165 | 0.4405 | 0.4844 | 0.4961 | 0.4975 |
| TDDA_480_18.txt 1100.00 | 254.4165 | 745.3269 | 683.8427 | 671.6956 | 666.6222 | 0.4229 | 0.4683 | 0.4811 | 0.4832 |

TAA\_multiTemperature\_candidate2.xlsx - Sheet #1

| x         | y         | z         | Radius  | Charge       | Atom |    |
|-----------|-----------|-----------|---------|--------------|------|----|
| 11.245000 | -6.793640 | -0.613950 | 1.55000 | 0.0067114000 |      | 14 |
| 10.755000 | -8.171380 | -1.111000 | 1.70000 | 0.0067114000 | 1    | 12 |
| 11.074100 | -9.373160 | -0.230350 | 1.70000 | 0.0067114000 |      | 12 |
| 10.337900 | -10.63610 | -0.759200 | 1.70000 | 0.0067114000 | 690  | 12 |
| 10.563300 | -11.80610 | 0.135020  | 1.70000 | 0.0067114000 |      | 12 |
| 10.045100 | -11.73810 | 1.580600  | 1.70000 | 0.0067114000 |      | 12 |
| 11.086800 | -11.35550 | 2.577000  | 1.70000 | 0.0067114000 |      | 12 |
| 10.487900 | -10.76280 | 3.853000  | 1.70000 | 0.0067114000 |      | 12 |
| 11.591700 | -10.34290 | 4.918300  | 1.70000 | 0.0067114000 |      | 12 |
| 12.404300 | -9.177060 | 4.381900  | 1.70000 | 0.0067114000 |      | 12 |
| 11.677600 | -7.817870 | 4.437000  | 1.70000 | 0.0067114000 |      | 12 |
| 12.565600 | -6.567150 | 4.075300  | 1.70000 | 0.0067114000 |      | 12 |
| 11.837200 | -5.313840 | 4.591300  | 1.70000 | 0.0067114000 |      | 12 |
| 11.132300 | -5.784770 | -1.749000 | 1.70000 | 0.0067114000 |      | 12 |
| 9.770790  | -5.562390 | -2.466500 | 1.70000 | 0.0067114000 |      | 12 |
| 9.846020  | -4.717950 | -3.785200 | 1.70000 | 0.0067114000 |      | 12 |
| 10.210600 | -3.268330 | -3.639700 | 1.70000 | 0.0067114000 |      | 12 |
| 9.717580  | -2.337030 | -4.734600 | 1.70000 | 0.0067114000 |      | 12 |
| 10.209700 | -0.879950 | -4.716800 | 1.70000 | 0.0067114000 |      | 12 |
| 9.754270  | -0.237051 | -3.438000 | 1.70000 | 0.0067114000 |      | 12 |
| 10.329900 | 1.092930  | -3.128800 | 1.70000 | 0.0067114000 |      | 12 |
| 10.017100 | 1.493740  | -1.674200 | 1.70000 | 0.0067114000 |      | 12 |
| 8.639990  | 2.126520  | -1.656400 | 1.70000 | 0.0067114000 |      | 12 |
| 8.056250  | 2.105870  | -0.172420 | 1.70000 | 0.0067114000 |      | 12 |
| 6.763250  | 2.998650  | -0.177120 | 1.70000 | 0.0067114000 |      | 12 |
| 10.570800 | -6.312920 | 0.674460  | 1.70000 | 0.0067114000 |      | 12 |
| 9.085290  | -6.097140 | 0.621600  | 1.70000 | 0.0067114000 |      | 12 |
| 8.485170  | -5.793630 | 2.043000  | 1.70000 | 0.0067114000 |      | 12 |
| 6.979520  | -5.655650 | 2.046800  | 1.70000 | 0.0067114000 |      | 12 |
| 6.175460  | -6.807870 | 1.342800  | 1.70000 | 0.0067114000 |      | 12 |
| 6.594590  | -8.210990 | 1.785500  | 1.70000 | 0.0067114000 |      | 12 |
| 6.373430  | -8.478130 | 3.291600  | 1.70000 | 0.0067114000 |      | 12 |
| 6.397300  | -10.02350 | 3.574100  | 1.70000 | 0.0067114000 |      | 12 |
| 6.300080  | -10.20640 | 5.089700  | 1.70000 | 0.0067114000 |      | 12 |
| 6.384840  | -11.66690 | 5.541500  | 1.70000 | 0.0067114000 |      | 12 |
| 6.267410  | -12.06850 | 7.094100  | 1.70000 | 0.0067114000 |      | 12 |
| 6.328690  | -13.62620 | 7.248400  | 1.70000 | 0.0067114000 |      | 12 |
| 12.732700 | -6.891870 | -0.076261 | 1.70000 | 0.0067114000 |      | 12 |
| 13.749900 | -7.165220 | -1.216400 | 1.70000 | 0.0067114000 |      | 12 |
| 15.200200 | -7.213800 | -0.728150 | 1.70000 | 0.0067114000 |      | 12 |
| 15.840700 | -6.039180 | -0.007511 | 1.70000 | 0.0067114000 |      | 12 |
| 16.088000 | -4.736920 | -0.868340 | 1.70000 | 0.0067114000 |      | 12 |
| 14.849200 | -3.725560 | -0.744260 | 1.70000 | 0.0067114000 |      | 12 |
| 15.294300 | -2.432400 | -1.521000 | 1.70000 | 0.0067114000 |      | 12 |
| 14.222900 | -1.315250 | -1.607800 | 1.70000 | 0.0067114000 |      | 12 |
| 14.850700 | -0.020165 | -2.066100 | 1.70000 | 0.0067114000 |      | 12 |

|           |           |           |         |              |    |
|-----------|-----------|-----------|---------|--------------|----|
| 15.808100 | 0.601212  | -0.933120 | 1.70000 | 0.0067114000 | 12 |
| 16.296700 | 2.024960  | -1.369400 | 1.70000 | 0.0067114000 | 12 |
| 17.163100 | 2.537690  | -0.219520 | 1.70000 | 0.0067114000 | 12 |
| 9.705510  | -8.292010 | -1.371400 | 1.10000 | 0.0067114000 | 1  |
| 11.273500 | -8.246130 | -2.037400 | 1.10000 | 0.0067114000 | 1  |
| 12.175500 | -9.543910 | -0.128880 | 1.10000 | 0.0067114000 | 1  |
| 10.725600 | -9.182930 | 0.856550  | 1.10000 | 0.0067114000 | 1  |
| 9.207590  | -10.34100 | -0.746940 | 1.10000 | 0.0067114000 | 1  |
| 10.595400 | -11.01170 | -1.784700 | 1.10000 | 0.0067114000 | 1  |
| 10.035800 | -12.68230 | -0.396700 | 1.10000 | 0.0067114000 | 1  |
| 11.697500 | -12.07980 | 0.105180  | 1.10000 | 0.0067114000 | 1  |
| 9.234440  | -10.99850 | 1.687200  | 1.10000 | 0.0067114000 | 1  |
| 9.619540  | -12.68090 | 1.944500  | 1.10000 | 0.0067114000 | 1  |
| 11.831100 | -12.11830 | 2.757900  | 1.10000 | 0.0067114000 | 1  |
| 11.703000 | -10.53710 | 2.021200  | 1.10000 | 0.0067114000 | 1  |
| 9.747380  | -9.915310 | 3.724100  | 1.10000 | 0.0067114000 | 1  |
| 9.824700  | -11.59580 | 4.309600  | 1.10000 | 0.0067114000 | 1  |
| 11.228300 | -9.858010 | 5.812100  | 1.10000 | 0.0067114000 | 1  |
| 12.152200 | -11.23830 | 5.310100  | 1.10000 | 0.0067114000 | 1  |
| 13.324300 | -9.179270 | 5.030900  | 1.10000 | 0.0067114000 | 1  |
| 12.857200 | -9.568620 | 3.369100  | 1.10000 | 0.0067114000 | 1  |
| 10.925500 | -7.884370 | 3.614900  | 1.10000 | 0.0067114000 | 1  |
| 11.297900 | -7.666900 | 5.429100  | 1.10000 | 0.0067114000 | 1  |
| 13.503900 | -6.770060 | 4.671800  | 1.10000 | 0.0067114000 | 1  |
| 12.746700 | -6.356510 | 2.998500  | 1.10000 | 0.0067114000 | 1  |
| 12.467000 | -4.415900 | 4.459600  | 1.10000 | 0.0067114000 | 1  |
| 10.866800 | -5.102440 | 4.154300  | 1.10000 | 0.0067114000 | 1  |
| 11.637700 | -5.508350 | 5.693000  | 1.10000 | 0.0067114000 | 1  |
| 11.551300 | -4.790270 | -1.538200 | 1.10000 | 0.0067114000 | 1  |
| 11.785700 | -6.144590 | -2.643400 | 1.10000 | 0.0067114000 | 1  |
| 9.350650  | -6.548400 | -2.635600 | 1.10000 | 0.0067114000 | 1  |
| 8.983280  | -5.027110 | -1.872400 | 1.10000 | 0.0067114000 | 1  |
| 10.647400 | -5.137810 | -4.331200 | 1.10000 | 0.0067114000 | 1  |
| 8.946800  | -4.786040 | -4.457500 | 1.10000 | 0.0067114000 | 1  |
| 9.680150  | -3.031070 | -2.715500 | 1.10000 | 0.0067114000 | 1  |
| 11.268700 | -3.079880 | -3.428400 | 1.10000 | 0.0067114000 | 1  |
| 10.181600 | -2.862610 | -5.727700 | 1.10000 | 0.0067114000 | 1  |
| 8.575520  | -2.253570 | -4.661700 | 1.10000 | 0.0067114000 | 1  |
| 11.323800 | -0.896496 | -4.669900 | 1.10000 | 0.0067114000 | 1  |
| 9.854320  | -0.180062 | -5.501500 | 1.10000 | 0.0067114000 | 1  |
| 8.615810  | -0.071302 | -3.399000 | 1.10000 | 0.0067114000 | 1  |
| 9.924540  | -0.810896 | -2.513600 | 1.10000 | 0.0067114000 | 1  |
| 11.406500 | 1.163810  | -3.420900 | 1.10000 | 0.0067114000 | 1  |
| 10.048100 | 1.995200  | -3.702900 | 1.10000 | 0.0067114000 | 1  |
| 10.067100 | 0.530019  | -1.097800 | 1.10000 | 0.0067114000 | 1  |
| 10.826200 | 2.043150  | -1.225500 | 1.10000 | 0.0067114000 | 1  |
| 7.776990  | 1.755960  | -2.294100 | 1.10000 | 0.0067114000 | 1  |
| 8.813140  | 3.223520  | -1.859500 | 1.10000 | 0.0067114000 | 1  |
| 7.971090  | 1.062110  | 0.176570  | 1.10000 | 0.0067114000 | 1  |
| 8.842930  | 2.468290  | 0.559310  | 1.10000 | 0.0067114000 | 1  |
| 6.950450  | 4.092980  | -0.289510 | 1.10000 | 0.0067114000 | 1  |
| 6.047750  | 2.609320  | -0.982650 | 1.10000 | 0.0067114000 | 1  |
| 6.171990  | 2.806810  | 0.679100  | 1.10000 | 0.0067114000 | 1  |
| 10.631700 | -7.117250 | 1.431800  | 1.10000 | 0.0067114000 | 1  |
| 10.987700 | -5.357770 | 1.027000  | 1.10000 | 0.0067114000 | 1  |
| 8.848700  | -5.202500 | 0.023456  | 1.10000 | 0.0067114000 | 1  |
| 8.581500  | -6.969910 | 0.185380  | 1.10000 | 0.0067114000 | 1  |
| 8.973650  | -6.604670 | 2.594800  | 1.10000 | 0.0067114000 | 1  |
| 8.867220  | -4.838450 | 2.401300  | 1.10000 | 0.0067114000 | 1  |
| 6.513110  | -5.492720 | 3.028900  | 1.10000 | 0.0067114000 | 1  |
| 6.661570  | -4.653880 | 1.539500  | 1.10000 | 0.0067114000 | 1  |
| 5.119080  | -6.627720 | 1.736600  | 1.10000 | 0.0067114000 | 1  |
| 6.174110  | -6.563210 | 0.316660  | 1.10000 | 0.0067114000 | 1  |
| 5.909680  | -8.940360 | 1.354500  | 1.10000 | 0.0067114000 | 1  |
| 7.578420  | -8.491480 | 1.471300  | 1.10000 | 0.0067114000 | 1  |
| 7.265700  | -8.148800 | 3.783500  | 1.10000 | 0.0067114000 | 1  |
| 5.469470  | -7.972900 | 3.810300  | 1.10000 | 0.0067114000 | 1  |
| 5.682660  | -10.65050 | 3.039800  | 1.10000 | 0.0067114000 | 1  |
| 7.481080  | -10.37510 | 3.227600  | 1.10000 | 0.0067114000 | 1  |
| 7.073190  | -9.617860 | 5.507000  | 1.10000 | 0.0067114000 | 1  |
| 5.317630  | -9.655180 | 5.459200  | 1.10000 | 0.0067114000 | 1  |
| 5.549570  | -12.17450 | 5.096200  | 1.10000 | 0.0067114000 | 1  |
| 7.206010  | -12.07260 | 4.967700  | 1.10000 | 0.0067114000 | 1  |
| 5.329430  | -11.61780 | 7.565400  | 1.10000 | 0.0067114000 | 1  |
| 7.091620  | -11.62700 | 7.642600  | 1.10000 | 0.0067114000 | 1  |
| 6.218060  | -13.85040 | 8.287900  | 1.10000 | 0.0067114000 | 1  |
| 7.382260  | -13.87390 | 6.959900  | 1.10000 | 0.0067114000 | 1  |
| 5.528260  | -14.11390 | 6.660200  | 1.10000 | 0.0067114000 | 1  |
| 12.965600 | -5.862770 | 0.338100  | 1.10000 | 0.0067114000 | 1  |
| 12.807600 | -7.617020 | 0.709390  | 1.10000 | 0.0067114000 | 1  |

|           |           |           |         |              |   |
|-----------|-----------|-----------|---------|--------------|---|
| 13.459500 | -8.113830 | -1.621700 | 1.10000 | 0.0067114000 | 1 |
| 13.680000 | -6.331540 | -1.981200 | 1.10000 | 0.0067114000 | 1 |
| 15.449700 | -8.103840 | -0.069326 | 1.10000 | 0.0067114000 | 1 |
| 15.792900 | -7.454130 | -1.650500 | 1.10000 | 0.0067114000 | 1 |
| 15.170000 | -5.939420 | 0.937610  | 1.10000 | 0.0067114000 | 1 |
| 16.878100 | -6.279270 | 0.340140  | 1.10000 | 0.0067114000 | 1 |
| 17.010600 | -4.262360 | -0.481660 | 1.10000 | 0.0067114000 | 1 |
| 16.311200 | -5.025020 | -1.922600 | 1.10000 | 0.0067114000 | 1 |
| 13.951200 | -4.051120 | -1.332100 | 1.10000 | 0.0067114000 | 1 |
| 14.559300 | -3.404120 | 0.286800  | 1.10000 | 0.0067114000 | 1 |
| 16.130600 | -2.183680 | -0.895880 | 1.10000 | 0.0067114000 | 1 |
| 15.551100 | -2.577520 | -2.590800 | 1.10000 | 0.0067114000 | 1 |
| 13.475900 | -1.571870 | -2.388300 | 1.10000 | 0.0067114000 | 1 |
| 13.838000 | -1.075040 | -0.488690 | 1.10000 | 0.0067114000 | 1 |
| 15.537300 | -0.279990 | -2.882400 | 1.10000 | 0.0067114000 | 1 |
| 14.131200 | 0.680190  | -2.534300 | 1.10000 | 0.0067114000 | 1 |
| 15.202200 | 0.638080  | -0.015153 | 1.10000 | 0.0067114000 | 1 |
| 16.749100 | 0.001803  | -0.743200 | 1.10000 | 0.0067114000 | 1 |
| 16.864300 | 2.097060  | -2.329400 | 1.10000 | 0.0067114000 | 1 |
| 15.439000 | 2.680370  | -1.430100 | 1.10000 | 0.0067114000 | 1 |
| 18.039500 | 1.792880  | -0.214130 | 1.10000 | 0.0067114000 | 1 |
| 17.633300 | 3.535310  | -0.491640 | 1.10000 | 0.0067114000 | 1 |
| 16.751300 | 2.483970  | 0.841370  | 1.10000 | 0.0067114000 | 1 |

TAA\_multiTemperature\_candidate2.xlsx - Sheet #2

| x         | y         | z         | Radius  | Charge       | Atom |    |
|-----------|-----------|-----------|---------|--------------|------|----|
| 9.861900  | -4.248160 | -1.183800 | 1.55000 | 0.0067114000 |      | 14 |
| 10.018700 | -4.754160 | 0.252220  | 1.70000 | 0.0067114000 | 1    | 12 |
| 8.689220  | -4.990170 | 1.109400  | 1.70000 | 0.0067114000 |      | 12 |
| 8.657960  | -6.403790 | 1.617300  | 1.70000 | 0.0067114000 | 690  | 12 |
| 9.851520  | -7.010100 | 2.336700  | 1.70000 | 0.0067114000 |      | 12 |
| 9.410420  | -8.163950 | 3.232400  | 1.70000 | 0.0067114000 |      | 12 |
| 8.824350  | -9.330680 | 2.345100  | 1.70000 | 0.0067114000 |      | 12 |
| 8.420220  | -10.53670 | 3.156400  | 1.70000 | 0.0067114000 |      | 12 |
| 8.114860  | -11.86670 | 2.371600  | 1.70000 | 0.0067114000 |      | 12 |
| 9.349980  | -12.81820 | 2.447200  | 1.70000 | 0.0067114000 |      | 12 |
| 9.288560  | -14.16500 | 1.636900  | 1.70000 | 0.0067114000 |      | 12 |
| 10.743100 | -14.78920 | 1.896700  | 1.70000 | 0.0067114000 |      | 12 |
| 11.857500 | -14.10920 | 1.031500  | 1.70000 | 0.0067114000 |      | 12 |
| 11.211600 | -4.253770 | -1.898900 | 1.70000 | 0.0067114000 |      | 12 |
| 12.358300 | -3.341710 | -1.378600 | 1.70000 | 0.0067114000 |      | 12 |
| 13.617300 | -4.108460 | -1.794800 | 1.70000 | 0.0067114000 |      | 12 |
| 13.986700 | -5.306800 | -0.725440 | 1.70000 | 0.0067114000 |      | 12 |
| 14.318800 | -5.091940 | 0.761180  | 1.70000 | 0.0067114000 |      | 12 |
| 15.475300 | -4.069120 | 0.853900  | 1.70000 | 0.0067114000 |      | 12 |
| 16.127700 | -3.883260 | 2.278500  | 1.70000 | 0.0067114000 |      | 12 |
| 16.563800 | -5.155020 | 3.064400  | 1.70000 | 0.0067114000 |      | 12 |
| 17.672300 | -5.998460 | 2.322600  | 1.70000 | 0.0067114000 |      | 12 |
| 17.900100 | -7.464430 | 2.844500  | 1.70000 | 0.0067114000 |      | 12 |
| 19.398800 | -7.770900 | 2.926900  | 1.70000 | 0.0067114000 |      | 12 |
| 20.057600 | -7.670190 | 1.455500  | 1.70000 | 0.0067114000 |      | 12 |
| 8.933670  | -5.170270 | -2.007900 | 1.70000 | 0.0067114000 |      | 12 |
| 9.519190  | -6.576290 | -1.963600 | 1.70000 | 0.0067114000 |      | 12 |
| 8.328780  | -7.609040 | -2.080400 | 1.70000 | 0.0067114000 |      | 12 |
| 8.807090  | -8.975820 | -2.596100 | 1.70000 | 0.0067114000 |      | 12 |
| 9.617670  | -9.653180 | -1.547100 | 1.70000 | 0.0067114000 |      | 12 |
| 10.370400 | -10.88980 | -1.994500 | 1.70000 | 0.0067114000 |      | 12 |
| 11.470400 | -10.72700 | -3.056100 | 1.70000 | 0.0067114000 |      | 12 |
| 12.467700 | -9.591820 | -2.720700 | 1.70000 | 0.0067114000 |      | 12 |
| 13.361800 | -9.943700 | -1.424400 | 1.70000 | 0.0067114000 |      | 12 |
| 14.706800 | -9.234990 | -1.436200 | 1.70000 | 0.0067114000 |      | 12 |
| 15.592200 | -9.586190 | -0.188800 | 1.70000 | 0.0067114000 |      | 12 |
| 15.912300 | -11.02170 | 0.005199  | 1.70000 | 0.0067114000 |      | 12 |
| 9.161330  | -2.777330 | -1.208500 | 1.70000 | 0.0067114000 |      | 12 |
| 9.692230  | -1.608470 | -0.366830 | 1.70000 | 0.0067114000 |      | 12 |
| 8.920310  | -0.327402 | -0.629790 | 1.70000 | 0.0067114000 |      | 12 |
| 9.570630  | 0.891276  | 0.056550  | 1.70000 | 0.0067114000 |      | 12 |
| 8.595680  | 2.063280  | -0.016932 | 1.70000 | 0.0067114000 |      | 12 |
| 7.388460  | 2.100300  | 1.006800  | 1.70000 | 0.0067114000 |      | 12 |
| 6.155400  | 2.882420  | 0.628880  | 1.70000 | 0.0067114000 |      | 12 |
| 5.002880  | 2.793360  | 1.652800  | 1.70000 | 0.0067114000 |      | 12 |
| 4.234700  | 4.079430  | 1.915200  | 1.70000 | 0.0067114000 |      | 12 |
| 3.095560  | 4.007560  | 2.952600  | 1.70000 | 0.0067114000 |      | 12 |
| 2.702640  | 5.493730  | 3.241800  | 1.70000 | 0.0067114000 |      | 12 |
| 2.229990  | 5.678640  | 4.761400  | 1.70000 | 0.0067114000 |      | 12 |
| 10.764200 | -5.579030 | 0.344120  | 1.10000 | 0.0067114000 |      | 1  |
| 10.609500 | -3.993420 | 0.743120  | 1.10000 | 0.0067114000 |      | 1  |
| 8.734950  | -4.257950 | 1.974100  | 1.10000 | 0.0067114000 |      | 1  |

|           |           |           |         |              |   |
|-----------|-----------|-----------|---------|--------------|---|
| 7.735860  | -4.686940 | 0.536730  | 1.10000 | 0.0067114000 | 1 |
| 7.770000  | -6.686860 | 2.313700  | 1.10000 | 0.0067114000 | 1 |
| 8.475100  | -6.962060 | 0.597840  | 1.10000 | 0.0067114000 | 1 |
| 10.616200 | -7.364380 | 1.646400  | 1.10000 | 0.0067114000 | 1 |
| 10.207700 | -6.270170 | 3.069200  | 1.10000 | 0.0067114000 | 1 |
| 10.225100 | -8.664180 | 3.790300  | 1.10000 | 0.0067114000 | 1 |
| 8.532180  | -7.919610 | 4.005300  | 1.10000 | 0.0067114000 | 1 |
| 7.906970  | -9.150260 | 1.813600  | 1.10000 | 0.0067114000 | 1 |
| 9.686040  | -9.661330 | 1.653400  | 1.10000 | 0.0067114000 | 1 |
| 9.220820  | -10.80480 | 3.843800  | 1.10000 | 0.0067114000 | 1 |
| 7.476590  | -10.29720 | 3.695100  | 1.10000 | 0.0067114000 | 1 |
| 7.215840  | -12.45710 | 2.784300  | 1.10000 | 0.0067114000 | 1 |
| 7.704650  | -11.66840 | 1.300100  | 1.10000 | 0.0067114000 | 1 |
| 10.088500 | -12.28430 | 1.839400  | 1.10000 | 0.0067114000 | 1 |
| 9.505750  | -13.12190 | 3.527300  | 1.10000 | 0.0067114000 | 1 |
| 8.527860  | -14.88170 | 2.119800  | 1.10000 | 0.0067114000 | 1 |
| 9.018930  | -13.95670 | 0.538100  | 1.10000 | 0.0067114000 | 1 |
| 10.923500 | -14.86640 | 2.958500  | 1.10000 | 0.0067114000 | 1 |
| 10.623300 | -15.86680 | 1.535400  | 1.10000 | 0.0067114000 | 1 |
| 11.411800 | -14.01450 | 0.053579  | 1.10000 | 0.0067114000 | 1 |
| 11.964300 | -13.04910 | 1.421100  | 1.10000 | 0.0067114000 | 1 |
| 12.812300 | -14.66460 | 0.948310  | 1.10000 | 0.0067114000 | 1 |
| 11.540100 | -5.232320 | -1.867500 | 1.10000 | 0.0067114000 | 1 |
| 11.203500 | -4.263890 | -2.991900 | 1.10000 | 0.0067114000 | 1 |
| 12.477500 | -2.342320 | -1.783500 | 1.10000 | 0.0067114000 | 1 |
| 12.392000 | -3.194660 | -0.255730 | 1.10000 | 0.0067114000 | 1 |
| 13.512800 | -4.740500 | -2.744500 | 1.10000 | 0.0067114000 | 1 |
| 14.559500 | -3.515220 | -1.922800 | 1.10000 | 0.0067114000 | 1 |
| 13.285600 | -6.120320 | -0.753960 | 1.10000 | 0.0067114000 | 1 |
| 14.904900 | -5.679150 | -1.236600 | 1.10000 | 0.0067114000 | 1 |
| 13.444200 | -4.846800 | 1.426800  | 1.10000 | 0.0067114000 | 1 |
| 14.865400 | -6.029670 | 1.025800  | 1.10000 | 0.0067114000 | 1 |
| 16.392200 | -4.231010 | 0.202810  | 1.10000 | 0.0067114000 | 1 |
| 15.005800 | -3.151720 | 0.461540  | 1.10000 | 0.0067114000 | 1 |
| 17.013300 | -3.243600 | 2.130400  | 1.10000 | 0.0067114000 | 1 |
| 15.355800 | -3.330930 | 2.889800  | 1.10000 | 0.0067114000 | 1 |
| 16.997400 | -5.033210 | 4.102500  | 1.10000 | 0.0067114000 | 1 |
| 15.564300 | -5.736170 | 3.112900  | 1.10000 | 0.0067114000 | 1 |
| 17.466100 | -5.924290 | 1.198200  | 1.10000 | 0.0067114000 | 1 |
| 18.560000 | -5.373210 | 2.457000  | 1.10000 | 0.0067114000 | 1 |
| 17.245600 | -8.054110 | 2.198400  | 1.10000 | 0.0067114000 | 1 |
| 17.409800 | -7.456270 | 3.873100  | 1.10000 | 0.0067114000 | 1 |
| 19.785300 | -6.969200 | 3.646400  | 1.10000 | 0.0067114000 | 1 |
| 19.337500 | -8.747490 | 3.430400  | 1.10000 | 0.0067114000 | 1 |
| 20.892400 | -8.398090 | 1.245900  | 1.10000 | 0.0067114000 | 1 |
| 19.386900 | -8.127010 | 0.713990  | 1.10000 | 0.0067114000 | 1 |
| 20.394300 | -6.606500 | 1.221100  | 1.10000 | 0.0067114000 | 1 |
| 8.002220  | -5.192370 | -1.498700 | 1.10000 | 0.0067114000 | 1 |
| 8.626610  | -4.827540 | -3.038300 | 1.10000 | 0.0067114000 | 1 |
| 10.136900 | -6.705130 | -2.821800 | 1.10000 | 0.0067114000 | 1 |
| 10.250000 | -6.890200 | -1.161500 | 1.10000 | 0.0067114000 | 1 |
| 7.735710  | -7.734710 | -1.099500 | 1.10000 | 0.0067114000 | 1 |
| 7.777830  | -7.105050 | -2.939500 | 1.10000 | 0.0067114000 | 1 |
| 8.009190  | -9.549670 | -3.032400 | 1.10000 | 0.0067114000 | 1 |
| 9.504290  | -8.820220 | -3.519100 | 1.10000 | 0.0067114000 | 1 |
| 10.323200 | -9.025130 | -1.066900 | 1.10000 | 0.0067114000 | 1 |
| 8.927750  | -9.919600 | -0.776110 | 1.10000 | 0.0067114000 | 1 |
| 10.893400 | -11.50700 | -1.203900 | 1.10000 | 0.0067114000 | 1 |
| 9.545500  | -11.52890 | -2.449200 | 1.10000 | 0.0067114000 | 1 |
| 11.855700 | -11.70200 | -3.350800 | 1.10000 | 0.0067114000 | 1 |
| 10.958800 | -10.40330 | -4.012900 | 1.10000 | 0.0067114000 | 1 |
| 13.228300 | -9.634930 | -3.514700 | 1.10000 | 0.0067114000 | 1 |
| 11.976600 | -8.600040 | -2.680200 | 1.10000 | 0.0067114000 | 1 |
| 12.836700 | -9.617340 | -0.485470 | 1.10000 | 0.0067114000 | 1 |
| 13.631900 | -10.99320 | -1.243800 | 1.10000 | 0.0067114000 | 1 |
| 15.325300 | -9.503430 | -2.344400 | 1.10000 | 0.0067114000 | 1 |
| 14.573800 | -8.089620 | -1.615800 | 1.10000 | 0.0067114000 | 1 |
| 15.069800 | -9.056930 | 0.710900  | 1.10000 | 0.0067114000 | 1 |
| 16.586200 | -9.117740 | -0.186310 | 1.10000 | 0.0067114000 | 1 |
| 14.905100 | -11.32640 | 0.426710  | 1.10000 | 0.0067114000 | 1 |
| 16.630700 | -11.31170 | 0.798100  | 1.10000 | 0.0067114000 | 1 |
| 16.278200 | -11.57870 | -0.869780 | 1.10000 | 0.0067114000 | 1 |
| 9.360760  | -2.488020 | -2.241800 | 1.10000 | 0.0067114000 | 1 |
| 8.109870  | -2.892920 | -1.138300 | 1.10000 | 0.0067114000 | 1 |
| 9.591300  | -1.877080 | 0.730920  | 1.10000 | 0.0067114000 | 1 |
| 10.742100 | -1.404050 | -0.479960 | 1.10000 | 0.0067114000 | 1 |
| 8.954720  | -0.281748 | -1.703700 | 1.10000 | 0.0067114000 | 1 |
| 7.915920  | -0.573113 | -0.322470 | 1.10000 | 0.0067114000 | 1 |
| 9.851350  | 0.675906  | 1.104900  | 1.10000 | 0.0067114000 | 1 |
| 10.541300 | 1.045390  | -0.424580 | 1.10000 | 0.0067114000 | 1 |

|          |          |           |         |              |   |
|----------|----------|-----------|---------|--------------|---|
| 9.283490 | 2.944610 | -0.015158 | 1.10000 | 0.0067114000 | 1 |
| 8.202780 | 2.021610 | -1.107100 | 1.10000 | 0.0067114000 | 1 |
| 7.052380 | 1.061760 | 1.215200  | 1.10000 | 0.0067114000 | 1 |
| 7.697980 | 2.563950 | 1.911100  | 1.10000 | 0.0067114000 | 1 |
| 6.418540 | 3.921720 | 0.265490  | 1.10000 | 0.0067114000 | 1 |
| 5.666100 | 2.334820 | -0.221540 | 1.10000 | 0.0067114000 | 1 |
| 4.259620 | 1.995340 | 1.584600  | 1.10000 | 0.0067114000 | 1 |
| 5.458930 | 2.451910 | 2.643900  | 1.10000 | 0.0067114000 | 1 |
| 5.009450 | 4.773470 | 2.411800  | 1.10000 | 0.0067114000 | 1 |
| 4.061920 | 4.792870 | 1.000900  | 1.10000 | 0.0067114000 | 1 |
| 2.287310 | 3.334320 | 2.483100  | 1.10000 | 0.0067114000 | 1 |
| 3.528930 | 3.437310 | 3.789700  | 1.10000 | 0.0067114000 | 1 |
| 3.469320 | 6.241280 | 2.995100  | 1.10000 | 0.0067114000 | 1 |
| 1.909410 | 5.720220 | 2.508800  | 1.10000 | 0.0067114000 | 1 |
| 1.979880 | 4.741030 | 5.276600  | 1.10000 | 0.0067114000 | 1 |
| 3.008440 | 6.132260 | 5.452900  | 1.10000 | 0.0067114000 | 1 |
| 1.333080 | 6.359490 | 4.627200  | 1.10000 | 0.0067114000 | 1 |

TAA\_multiTemperature\_candidate2.xlsx - Sheet #3

| x         | y         | z         | Radius  | Charge       | Atom |    |
|-----------|-----------|-----------|---------|--------------|------|----|
| 10.703900 | -6.105630 | -0.796950 | 1.55000 | 0.0067114000 |      | 14 |
| 11.809700 | -7.090090 | -1.098800 | 1.70000 | 0.0067114000 |      | 12 |
| 13.194300 | -6.836570 | -0.287470 | 1.70000 | 0.0067114000 |      | 12 |
| 14.144200 | -8.033550 | -0.665960 | 1.70000 | 0.0067114000 | 690  | 12 |
| 15.015400 | -8.006270 | -1.896800 | 1.70000 | 0.0067114000 |      | 12 |
| 16.383500 | -7.435310 | -1.691500 | 1.70000 | 0.0067114000 |      | 12 |
| 16.516300 | -5.963490 | -1.380600 | 1.70000 | 0.0067114000 |      | 12 |
| 17.740400 | -5.244390 | -1.967100 | 1.70000 | 0.0067114000 |      | 12 |
| 19.051000 | -5.886290 | -1.568300 | 1.70000 | 0.0067114000 |      | 12 |
| 19.048600 | -5.720160 | 0.016875  | 1.70000 | 0.0067114000 |      | 12 |
| 20.353100 | -5.921630 | 0.705390  | 1.70000 | 0.0067114000 |      | 12 |
| 21.253500 | -7.138240 | 0.323390  | 1.70000 | 0.0067114000 |      | 12 |
| 20.724300 | -8.524250 | 0.585410  | 1.70000 | 0.0067114000 |      | 12 |
| 9.554630  | -6.364670 | -1.803300 | 1.70000 | 0.0067114000 |      | 12 |
| 8.939120  | -7.778290 | -1.653300 | 1.70000 | 0.0067114000 |      | 12 |
| 7.544710  | -7.991510 | -2.544700 | 1.70000 | 0.0067114000 |      | 12 |
| 6.981130  | -9.462120 | -2.343300 | 1.70000 | 0.0067114000 |      | 12 |
| 6.803370  | -10.00710 | -0.772040 | 1.70000 | 0.0067114000 |      | 12 |
| 5.592430  | -9.339530 | -0.124760 | 1.70000 | 0.0067114000 |      | 12 |
| 5.731110  | -9.231320 | 1.549100  | 1.70000 | 0.0067114000 |      | 12 |
| 4.828310  | -8.147780 | 2.091700  | 1.70000 | 0.0067114000 |      | 12 |
| 3.315320  | -8.402210 | 2.161800  | 1.70000 | 0.0067114000 |      | 12 |
| 2.475780  | -7.591260 | 3.144200  | 1.70000 | 0.0067114000 |      | 12 |
| 2.720040  | -7.765150 | 4.593900  | 1.70000 | 0.0067114000 |      | 12 |
| 2.369430  | -6.619680 | 5.580300  | 1.70000 | 0.0067114000 |      | 12 |
| 10.269500 | -6.230000 | 0.584870  | 1.70000 | 0.0067114000 |      | 12 |
| 9.202750  | -5.308140 | 1.313000  | 1.70000 | 0.0067114000 |      | 12 |
| 8.751600  | -6.073080 | 2.482500  | 1.70000 | 0.0067114000 |      | 12 |
| 7.687370  | -5.232850 | 3.215700  | 1.70000 | 0.0067114000 |      | 12 |
| 7.070310  | -5.792580 | 4.465400  | 1.70000 | 0.0067114000 |      | 12 |
| 8.165580  | -6.092100 | 5.553300  | 1.70000 | 0.0067114000 |      | 12 |
| 8.582080  | -7.566050 | 5.879200  | 1.70000 | 0.0067114000 |      | 12 |
| 7.387870  | -8.422240 | 6.505100  | 1.70000 | 0.0067114000 |      | 12 |
| 6.391140  | -9.190050 | 5.693400  | 1.70000 | 0.0067114000 |      | 12 |
| 5.743620  | -10.46010 | 6.202600  | 1.70000 | 0.0067114000 |      | 12 |
| 4.859190  | -10.97410 | 5.061700  | 1.70000 | 0.0067114000 |      | 12 |
| 3.818240  | -11.99260 | 5.731000  | 1.70000 | 0.0067114000 |      | 12 |
| 11.123100 | -4.560680 | -0.824650 | 1.70000 | 0.0067114000 |      | 12 |
| 11.633800 | -3.957720 | -2.198800 | 1.70000 | 0.0067114000 |      | 12 |
| 11.651100 | -2.398540 | -2.178000 | 1.70000 | 0.0067114000 |      | 12 |
| 12.978200 | -1.761170 | -1.860800 | 1.70000 | 0.0067114000 |      | 12 |
| 12.754800 | -0.211492 | -2.141400 | 1.70000 | 0.0067114000 |      | 12 |
| 12.295300 | 0.544744  | -0.870460 | 1.70000 | 0.0067114000 |      | 12 |
| 12.304000 | 2.040380  | -0.910100 | 1.70000 | 0.0067114000 |      | 12 |
| 13.687000 | 2.760200  | -1.147400 | 1.70000 | 0.0067114000 |      | 12 |
| 13.727000 | 3.211870  | -2.596500 | 1.70000 | 0.0067114000 |      | 12 |
| 15.186500 | 3.468790  | -3.059300 | 1.70000 | 0.0067114000 |      | 12 |
| 15.216400 | 3.944560  | -4.561100 | 1.70000 | 0.0067114000 |      | 12 |
| 14.884900 | 5.401240  | -4.699200 | 1.70000 | 0.0067114000 |      | 12 |
| 11.359200 | -8.103260 | -1.115700 | 1.10000 | 0.0067114000 |      | 1  |
| 12.142600 | -6.949370 | -2.198100 | 1.10000 | 0.0067114000 |      | 1  |
| 13.666600 | -5.909270 | -0.640860 | 1.10000 | 0.0067114000 |      | 1  |
| 12.987900 | -6.728140 | 0.876340  | 1.10000 | 0.0067114000 |      | 1  |
| 14.915300 | -8.179880 | 0.189250  | 1.10000 | 0.0067114000 |      | 1  |
| 13.576000 | -8.963660 | -0.776290 | 1.10000 | 0.0067114000 |      | 1  |
| 15.265100 | -9.037220 | -2.136500 | 1.10000 | 0.0067114000 |      | 1  |
| 14.434000 | -7.724150 | -2.772500 | 1.10000 | 0.0067114000 |      | 1  |
| 17.157200 | -7.932830 | -1.214700 | 1.10000 | 0.0067114000 |      | 1  |



|           |           |           |         |              |   |
|-----------|-----------|-----------|---------|--------------|---|
| 16.787100 | -7.533700 | -2.719100 | 1.10000 | 0.0067114000 | 1 |
| 15.703700 | -5.368470 | -1.705800 | 1.10000 | 0.0067114000 | 1 |
| 16.476300 | -5.840670 | -0.287680 | 1.10000 | 0.0067114000 | 1 |
| 17.646000 | -5.391820 | -3.053300 | 1.10000 | 0.0067114000 | 1 |
| 17.691700 | -4.123840 | -1.739900 | 1.10000 | 0.0067114000 | 1 |
| 19.181700 | -6.907180 | -1.952300 | 1.10000 | 0.0067114000 | 1 |
| 19.889500 | -5.433300 | -2.091900 | 1.10000 | 0.0067114000 | 1 |
| 18.380400 | -4.877370 | 0.531190  | 1.10000 | 0.0067114000 | 1 |
| 18.552300 | -6.631110 | 0.392920  | 1.10000 | 0.0067114000 | 1 |
| 20.923700 | -4.930250 | 0.469650  | 1.10000 | 0.0067114000 | 1 |
| 20.103300 | -5.891270 | 1.807300  | 1.10000 | 0.0067114000 | 1 |
| 21.394700 | -7.001420 | -0.740200 | 1.10000 | 0.0067114000 | 1 |
| 22.290800 | -7.080640 | 0.764720  | 1.10000 | 0.0067114000 | 1 |
| 21.005900 | -8.763790 | 1.606200  | 1.10000 | 0.0067114000 | 1 |
| 19.621900 | -8.666720 | 0.385660  | 1.10000 | 0.0067114000 | 1 |
| 21.085300 | -9.258470 | -0.100200 | 1.10000 | 0.0067114000 | 1 |
| 8.799730  | -5.624640 | -1.582100 | 1.10000 | 0.0067114000 | 1 |
| 9.922350  | -6.222330 | -2.831600 | 1.10000 | 0.0067114000 | 1 |
| 9.711400  | -8.473510 | -2.053800 | 1.10000 | 0.0067114000 | 1 |
| 8.737260  | -7.998240 | -0.637460 | 1.10000 | 0.0067114000 | 1 |
| 6.747130  | -7.286000 | -2.174300 | 1.10000 | 0.0067114000 | 1 |
| 7.883720  | -7.925410 | -3.668400 | 1.10000 | 0.0067114000 | 1 |
| 6.020530  | -9.501830 | -2.824700 | 1.10000 | 0.0067114000 | 1 |
| 7.584360  | -10.13850 | -2.928300 | 1.10000 | 0.0067114000 | 1 |
| 6.690010  | -11.16210 | -0.843260 | 1.10000 | 0.0067114000 | 1 |
| 7.771310  | -9.919520 | -0.188180 | 1.10000 | 0.0067114000 | 1 |
| 5.790890  | -8.341930 | -0.519280 | 1.10000 | 0.0067114000 | 1 |
| 4.550020  | -9.862620 | -0.267190 | 1.10000 | 0.0067114000 | 1 |
| 5.553470  | -10.13400 | 2.237000  | 1.10000 | 0.0067114000 | 1 |
| 6.859650  | -9.187750 | 1.684900  | 1.10000 | 0.0067114000 | 1 |
| 5.316430  | -7.839240 | 3.119000  | 1.10000 | 0.0067114000 | 1 |
| 5.046280  | -7.268210 | 1.436900  | 1.10000 | 0.0067114000 | 1 |
| 3.008250  | -8.456540 | 1.105700  | 1.10000 | 0.0067114000 | 1 |
| 3.295960  | -9.455050 | 2.655600  | 1.10000 | 0.0067114000 | 1 |
| 1.427360  | -7.695770 | 2.820100  | 1.10000 | 0.0067114000 | 1 |
| 2.272260  | -6.521050 | 2.880800  | 1.10000 | 0.0067114000 | 1 |
| 2.664350  | -8.803930 | 4.956200  | 1.10000 | 0.0067114000 | 1 |
| 3.780560  | -7.417630 | 4.579200  | 1.10000 | 0.0067114000 | 1 |
| 2.485310  | -5.608290 | 5.059100  | 1.10000 | 0.0067114000 | 1 |
| 1.274430  | -6.814830 | 5.745400  | 1.10000 | 0.0067114000 | 1 |
| 2.947210  | -6.692710 | 6.528600  | 1.10000 | 0.0067114000 | 1 |
| 9.942060  | -7.325320 | 0.739740  | 1.10000 | 0.0067114000 | 1 |
| 11.170900 | -6.162440 | 1.228400  | 1.10000 | 0.0067114000 | 1 |
| 9.789840  | -4.390360 | 1.615700  | 1.10000 | 0.0067114000 | 1 |
| 8.279010  | -5.060390 | 0.744680  | 1.10000 | 0.0067114000 | 1 |
| 8.415350  | -7.050230 | 1.991900  | 1.10000 | 0.0067114000 | 1 |
| 9.488890  | -6.270600 | 3.271200  | 1.10000 | 0.0067114000 | 1 |
| 8.174870  | -4.279410 | 3.584300  | 1.10000 | 0.0067114000 | 1 |
| 6.920040  | -4.896620 | 2.480800  | 1.10000 | 0.0067114000 | 1 |
| 6.288030  | -5.121030 | 4.827200  | 1.10000 | 0.0067114000 | 1 |
| 6.477850  | -6.679510 | 4.265000  | 1.10000 | 0.0067114000 | 1 |
| 9.068380  | -5.575300 | 5.173500  | 1.10000 | 0.0067114000 | 1 |
| 7.800070  | -5.533710 | 6.441800  | 1.10000 | 0.0067114000 | 1 |
| 9.072840  | -7.993310 | 4.965300  | 1.10000 | 0.0067114000 | 1 |
| 9.395570  | -7.521520 | 6.673600  | 1.10000 | 0.0067114000 | 1 |
| 7.837720  | -9.333110 | 6.950400  | 1.10000 | 0.0067114000 | 1 |
| 7.035650  | -7.863320 | 7.421900  | 1.10000 | 0.0067114000 | 1 |
| 5.588390  | -8.449710 | 5.575800  | 1.10000 | 0.0067114000 | 1 |
| 6.983250  | -9.538040 | 4.762000  | 1.10000 | 0.0067114000 | 1 |
| 6.496470  | -11.17680 | 6.764400  | 1.10000 | 0.0067114000 | 1 |
| 5.117920  | -10.19150 | 7.035300  | 1.10000 | 0.0067114000 | 1 |
| 5.440090  | -11.64670 | 4.376900  | 1.10000 | 0.0067114000 | 1 |
| 4.272160  | -10.12480 | 4.496300  | 1.10000 | 0.0067114000 | 1 |
| 4.342110  | -12.76200 | 6.346900  | 1.10000 | 0.0067114000 | 1 |
| 3.224260  | -12.46810 | 5.004000  | 1.10000 | 0.0067114000 | 1 |
| 3.158360  | -11.77900 | 6.692200  | 1.10000 | 0.0067114000 | 1 |
| 10.270000 | -3.991200 | -0.567460 | 1.10000 | 0.0067114000 | 1 |
| 11.751700 | -4.428120 | 0.121010  | 1.10000 | 0.0067114000 | 1 |
| 12.584100 | -4.487280 | -2.477000 | 1.10000 | 0.0067114000 | 1 |
| 10.818800 | -4.301140 | -2.845300 | 1.10000 | 0.0067114000 | 1 |
| 11.157300 | -2.125920 | -3.188100 | 1.10000 | 0.0067114000 | 1 |
| 10.859200 | -2.146540 | -1.302100 | 1.10000 | 0.0067114000 | 1 |
| 13.323900 | -1.924080 | -0.801500 | 1.10000 | 0.0067114000 | 1 |
| 13.781500 | -2.041130 | -2.623500 | 1.10000 | 0.0067114000 | 1 |
| 13.832100 | 0.131644  | -2.246600 | 1.10000 | 0.0067114000 | 1 |
| 12.338900 | 0.143044  | -3.094000 | 1.10000 | 0.0067114000 | 1 |
| 11.269600 | 0.124644  | -0.675910 | 1.10000 | 0.0067114000 | 1 |
| 12.846400 | 0.065015  | 0.000800  | 1.10000 | 0.0067114000 | 1 |
| 11.708000 | 2.573770  | -1.673400 | 1.10000 | 0.0067114000 | 1 |
| 11.746300 | 2.457920  | -0.016151 | 1.10000 | 0.0067114000 | 1 |

|           |          |           |         |              |   |
|-----------|----------|-----------|---------|--------------|---|
| 13.693100 | 3.783610 | -0.480750 | 1.10000 | 0.0067114000 | 1 |
| 14.610000 | 2.378730 | -0.785970 | 1.10000 | 0.0067114000 | 1 |
| 13.170400 | 2.384230 | -3.225800 | 1.10000 | 0.0067114000 | 1 |
| 12.928900 | 3.899010 | -2.632800 | 1.10000 | 0.0067114000 | 1 |
| 15.706500 | 4.264320 | -2.528800 | 1.10000 | 0.0067114000 | 1 |
| 15.903200 | 2.578110 | -2.847300 | 1.10000 | 0.0067114000 | 1 |
| 16.246400 | 3.689980 | -4.938800 | 1.10000 | 0.0067114000 | 1 |
| 14.467200 | 3.398480 | -5.271000 | 1.10000 | 0.0067114000 | 1 |
| 15.479800 | 5.637210 | -5.655600 | 1.10000 | 0.0067114000 | 1 |
| 13.796500 | 5.664970 | -4.744100 | 1.10000 | 0.0067114000 | 1 |
| 15.362500 | 5.967870 | -3.827900 | 1.10000 | 0.0067114000 | 1 |

IMoS.cla

```
-----
excelfile      Savefile      Gas
/filefolder/TAA_multiTemperature_candidate2.xlsx /savefolder/TDDA_SI2.txt  N2

DNRCustomRange 0 0
interface 0
fromvalue 1
tovalue 3
red_coef 1.13
Charge 1
radgas 1.5
Mgas 28
Pressure 101325
Mweight 690
Temperature 295
Polarizability 1.7
NrotationsPA 500
NrotationsEHSS 3
NrotationsTM 3
NgastotalEHSS 300000
NgastotalTM 300000
Accommodation 0
Timestep 100
Boxdomain 16
Diffuse? 1
reemvel 1
Other 0
Simplify 0
PA 0
PATSA 0
EHSS/DHSS 0
TM 0
TDHSS 0
qpol 0
LennardJones 1
DTM 0
HEN 4
TeffRange 295 296 297 298.5 300 302 305 308 312 315 320 325 330 340 350 365 380 420 470 530 600 680 770 870 980 1100
EsEc 1
ft_vector 0.33333 0.28885 0.90371 0.90371 0.28885 -0.33333 -0.49486 -0.36437 -0.36437 -0.49486 -0.33333
t_vector 0 0.1 0.2 0.3 0.4 0.5 0.6 0.7 0.8 0.9 1
MultiT 1
MultiTval 295
seed 13
Numthreads 15
Repeatseed 1
DragRG 1
```

## Independent Result for One Structure (295K) of THA:

IMoS v1.13 RESULTS FILE

File: TAA\_multiTemperature\_candidate2.xlsx      Molecule: THA\_295\_11.txt

Number of atoms: 89  
Molecular Weight: 410.00 Da  
Total Charge: 1

The TM Method used is High Field

Performing TMLJ calculations for: TAA\_multiTemperature\_candidate2.xlsx and molecule THA\_295\_11.txt.

Results

Summary of ion calculations:

Ko represents reduced mobility!

| Ion            | Teff<br>(K) | CCS<br>(A2) | E/n1<br>(Td) | E/n2<br>(Td) | E/n3<br>(Td) | E/n4<br>(Td) | <Ko1><br>(cm2/Vs) | <Ko2><br>(cm2/Vs) | <Ko3><br>(cm2/Vs) | <Ko4><br>(cm2/Vs) |        |
|----------------|-------------|-------------|--------------|--------------|--------------|--------------|-------------------|-------------------|-------------------|-------------------|--------|
| THA_295_11.txt | 295.00      | 239.4260    | 0.0000       | 0.0000       | 0.0000       | 0.0000       | 0.0000            | 0.8792            | 0.8792            | 0.8792            | 0.8792 |
| THA_295_11.txt | 296.00      | 239.1768    | 12.6434      | 12.6397      | 12.6397      | 12.6397      | 12.6397           | 0.8786            | 0.8789            | 0.8789            | 0.8789 |
| THA_295_11.txt | 297.00      | 238.9365    | 17.8927      | 17.8833      | 17.8833      | 17.8833      | 17.8833           | 0.8780            | 0.8785            | 0.8785            | 0.8785 |
| THA_295_11.txt | 298.50      | 238.5663    | 23.6927      | 23.6724      | 23.6723      | 23.6723      | 23.6723           | 0.8772            | 0.8780            | 0.8780            | 0.8780 |
| THA_295_11.txt | 300.00      | 238.1443    | 28.3391      | 28.3052      | 28.3051      | 28.3051      | 28.3051           | 0.8765            | 0.8776            | 0.8776            | 0.8776 |
| THA_295_11.txt | 302.00      | 237.5882    | 33.5643      | 33.5092      | 33.5089      | 33.5089      | 33.5089           | 0.8757            | 0.8772            | 0.8772            | 0.8772 |
| THA_295_11.txt | 305.00      | 236.8985    | 40.1987      | 40.1064      | 40.1056      | 40.1056      | 40.1056           | 0.8739            | 0.8760            | 0.8760            | 0.8760 |
| THA_295_11.txt | 308.00      | 236.4286    | 45.9671      | 45.8325      | 45.8311      | 45.8309      | 45.8309           | 0.8714            | 0.8741            | 0.8741            | 0.8741 |
| THA_295_11.txt | 312.00      | 235.4980    | 52.6974      | 52.4983      | 52.4956      | 52.4953      | 52.4953           | 0.8692            | 0.8727            | 0.8728            | 0.8727 |
| THA_295_11.txt | 315.00      | 234.7817    | 57.2578      | 57.0052      | 57.0012      | 57.0006      | 57.0006           | 0.8677            | 0.8718            | 0.8719            | 0.8718 |
| THA_295_11.txt | 320.00      | 233.7584    | 64.2410      | 63.8918      | 63.8851      | 63.8841      | 63.8841           | 0.8646            | 0.8698            | 0.8698            | 0.8698 |
| THA_295_11.txt | 325.00      | 232.6763    | 70.5918      | 70.1364      | 70.1261      | 70.1245      | 70.1245           | 0.8619            | 0.8680            | 0.8682            | 0.8681 |
| THA_295_11.txt | 330.00      | 231.7007    | 76.5100      | 75.9413      | 75.9267      | 75.9242      | 75.9242           | 0.8590            | 0.8660            | 0.8662            | 0.8661 |
| THA_295_11.txt | 340.00      | 229.6358    | 87.2740      | 86.4553      | 86.4291      | 86.4243      | 86.4243           | 0.8539            | 0.8628            | 0.8630            | 0.8629 |
| THA_295_11.txt | 350.00      | 227.7851    | 97.1048      | 96.0133      | 95.9723      | 95.9642      | 95.9642           | 0.8484            | 0.8591            | 0.8595            | 0.8593 |
| THA_295_11.txt | 365.00      | 225.0796    | 110.5430     | 109.0017     | 108.9315     | 108.9164     | 108.9164          | 0.8408            | 0.8540            | 0.8546            | 0.8544 |
| THA_295_11.txt | 380.00      | 222.5090    | 122.8708     | 120.8388     | 120.7314     | 120.7067     | 120.7067          | 0.8336            | 0.8492            | 0.8501            | 0.8498 |
| THA_295_11.txt | 420.00      | 216.4968    | 152.4162     | 148.9189     | 148.6744     | 148.6105     | 148.6105          | 0.8149            | 0.8366            | 0.8382            | 0.8377 |
| THA_295_11.txt | 470.00      | 210.2252    | 185.2476     | 179.6738     | 179.1837     | 179.0411     | 179.0411          | 0.7933            | 0.8216            | 0.8244            | 0.8237 |
| THA_295_11.txt | 530.00      | 204.1505    | 221.3717     | 213.0654     | 212.1873     | 211.9089     | 211.9089          | 0.7693            | 0.8042            | 0.8086            | 0.8078 |
| THA_295_11.txt | 600.00      | 198.3652    | 260.7299     | 248.9750     | 247.5266     | 247.0338     | 247.0338          | 0.7441            | 0.7854            | 0.7918            | 0.7910 |
| THA_295_11.txt | 680.00      | 193.2082    | 303.7458     | 287.8750     | 285.6687     | 284.8734     | 284.8734          | 0.7176            | 0.7645            | 0.7730            | 0.7725 |
| THA_295_11.txt | 770.00      | 188.5881    | 350.4340     | 329.7758     | 326.6062     | 325.4074     | 325.4074          | 0.6909            | 0.7426            | 0.7532            | 0.7532 |
| THA_295_11.txt | 870.00      | 184.4675    | 400.8789     | 374.7673     | 370.4274     | 368.7192     | 368.7192          | 0.6645            | 0.7201            | 0.7328            | 0.7333 |
| THA_295_11.txt | 980.00      | 180.8231    | 455.2102     | 423.0070     | 417.2938     | 414.9696     | 414.9696          | 0.6387            | 0.6974            | 0.7120            | 0.7133 |
| THA_295_11.txt | 1100.00     | 177.5703    | 513.4101     | 474.4896     | 467.2000     | 464.1517     | 464.1517          | 0.6139            | 0.6750            | 0.6913            | 0.6932 |

Dispersion plot

alpha is obtained by dividing Mobility by zero field Mobility (not reduced)

| Ion            | Ed<br>(Td) | Ec<br>(Td) | alpha<br>(Td) | E/n<br>(Td) |
|----------------|------------|------------|---------------|-------------|
| THA_295_11.txt | 0.0000     | 0.0000     | 0.0000        | 0.0000      |
| THA_295_11.txt | 12.6397    | 0.0005     | -0.0004       | 12.6397     |
| THA_295_11.txt | 17.8833    | 0.0017     | -0.0008       | 17.8833     |
| THA_295_11.txt | 23.6723    | 0.0039     | -0.0014       | 23.6723     |
| THA_295_11.txt | 28.3051    | 0.0060     | -0.0018       | 28.3051     |
| THA_295_11.txt | 33.5089    | 0.0087     | -0.0023       | 33.5089     |
| THA_295_11.txt | 40.1055    | 0.0146     | -0.0036       | 40.1055     |
| THA_295_11.txt | 45.8309    | 0.0263     | -0.0058       | 45.8309     |
| THA_295_11.txt | 52.4953    | 0.0425     | -0.0074       | 52.4953     |
| THA_295_11.txt | 57.0006    | 0.0545     | -0.0084       | 57.0006     |
| THA_295_11.txt | 63.8841    | 0.0791     | -0.0107       | 63.8841     |
| THA_295_11.txt | 70.1245    | 0.1055     | -0.0126       | 70.1245     |
| THA_295_11.txt | 75.9242    | 0.1349     | -0.0149       | 75.9242     |
| THA_295_11.txt | 86.4243    | 0.1906     | -0.0186       | 86.4243     |
| THA_295_11.txt | 95.9642    | 0.2487     | -0.0227       | 95.9642     |
| THA_295_11.txt | 108.9164   | 0.3507     | -0.0283       | 108.9164    |
| THA_295_11.txt | 120.7067   | 0.4609     | -0.0335       | 120.7067    |
| THA_295_11.txt | 148.6105   | 0.7963     | -0.0472       | 148.6105    |
| THA_295_11.txt | 179.0411   | 1.2916     | -0.0631       | 179.0411    |
| THA_295_11.txt | 211.9089   | 1.9751     | -0.0812       | 211.9089    |
| THA_295_11.txt | 247.0338   | 2.8740     | -0.1003       | 247.0338    |
| THA_295_11.txt | 284.8734   | 4.0446     | -0.1213       | 284.8734    |
| THA_295_11.txt | 325.4074   | 5.5164     | -0.1434       | 325.4074    |
| THA_295_11.txt | 368.7192   | 7.3176     | -0.1659       | 368.7192    |
| THA_295_11.txt | 414.9696   | 9.4685     | -0.1888       | 414.9696    |
| THA_295_11.txt | 464.1517   | 11.9872    | -0.2115       | 464.1517    |

LJTM calculation parameters:

Number of loops (itn) = 1  
 Number of velocity points (inp) = 5  
 Number of random rotations and impact parameters (imp) = 180000  
 Total Trajectories = 900000

Max time step = 1.00e-13 second  
 Min time step = 1.00e-16 second  
 Time step corrector = 100.00

Ratio of potential energy to kinetic energy at the starting of Traj (sw1) = 0.001000  
 Maximum value of [1-cosX] at b\_max (cmin) = 0.000100  
 Seed = 13  
 Time taken is a mere 384.3458 seconds

PARAMETERS USED:

Gas: N2  
 Reduction Coef: 1.070  
 Molecular mass of Gas: 28.00 Da  
 Alpha polarization: 1.70 A3  
 Radius of gas: 1.50 A  
 Temperature: 295 K  
 Pressure: 101325 Pa

Lennard Jones parameters for basic  
 Atom eps(J\*10<sup>-21</sup>) sigma(A)

```
-----
H  0.480600000  2.300000000
C  0.744930000  3.500000000
O  0.688860000  3.500000000
N  0.929160000  4.200000000
F  0.192240000  3.400000000
Cs 0.581400000  4.200810000
Na 0.416776320  3.500000000
Cl 0.416776320  3.500000000
I  0.630000000  5.400000000
K  0.416776320  3.500000000
Rb 0.416776320  3.500000000
P  0.416776320  3.500000000
Ca 0.416776320  3.500000000
Li 0.416776320  3.500000000
S  0.416776320  3.500000000
Other 0.416776320  3.500000000
```

SUMMARY OF HIGH FIELD CALCULATIONS

FAIMS/DMS Dispersion field curve used

```
ft      t
(AU)    (s)
-----
0.33333000  0.0000
0.28885000  0.1000
0.90371000  0.2000
0.90371000  0.3000
0.28885000  0.4000
-0.33333000  0.5000
-0.49486000  0.6000
-0.36437000  0.7000
-0.36437000  0.8000
-0.49486000  0.9000
-0.33333000  1.0000
```

| Ion            | Teff<br>(K) | CCS<br>(A2) | E/n1<br>(Td) | E/n2<br>(Td) | E/n3<br>(Td) | E/n4<br>(Td) | <Ko1><br>(cm2/Vs) | <Ko2><br>(cm2/Vs) | <Ko3><br>(cm2/Vs) | <Ko4><br>(cm2/Vs) |        |
|----------------|-------------|-------------|--------------|--------------|--------------|--------------|-------------------|-------------------|-------------------|-------------------|--------|
| THA_295_11.txt | 295.00      | 239.4260    | 0.0000       | 0.0000       | 0.0000       | 0.0000       | 0.0000            | 0.8792            | 0.8792            | 0.8792            | 0.8792 |
| THA_295_11.txt | 296.00      | 239.1768    | 12.6434      | 12.6397      | 12.6397      | 12.6397      | 12.6397           | 0.8786            | 0.8789            | 0.8789            | 0.8789 |
| THA_295_11.txt | 297.00      | 238.9365    | 17.8927      | 17.8833      | 17.8833      | 17.8833      | 17.8833           | 0.8780            | 0.8785            | 0.8785            | 0.8785 |
| THA_295_11.txt | 298.50      | 238.5663    | 23.6927      | 23.6724      | 23.6723      | 23.6723      | 23.6723           | 0.8772            | 0.8780            | 0.8780            | 0.8780 |
| THA_295_11.txt | 300.00      | 238.1443    | 28.3391      | 28.3052      | 28.3051      | 28.3051      | 28.3051           | 0.8765            | 0.8776            | 0.8776            | 0.8776 |
| THA_295_11.txt | 302.00      | 237.5882    | 33.5643      | 33.5092      | 33.5089      | 33.5089      | 33.5089           | 0.8757            | 0.8772            | 0.8772            | 0.8772 |
| THA_295_11.txt | 305.00      | 236.8985    | 40.1987      | 40.1064      | 40.1056      | 40.1056      | 40.1056           | 0.8739            | 0.8760            | 0.8760            | 0.8760 |
| THA_295_11.txt | 308.00      | 236.4286    | 45.9671      | 45.8325      | 45.8311      | 45.8309      | 45.8309           | 0.8714            | 0.8741            | 0.8741            | 0.8741 |
| THA_295_11.txt | 312.00      | 235.4980    | 52.6974      | 52.4983      | 52.4956      | 52.4953      | 52.4953           | 0.8692            | 0.8727            | 0.8728            | 0.8727 |
| THA_295_11.txt | 315.00      | 234.7817    | 57.2578      | 57.0052      | 57.0012      | 57.0006      | 57.0006           | 0.8677            | 0.8718            | 0.8719            | 0.8718 |
| THA_295_11.txt | 320.00      | 233.7584    | 64.2410      | 63.8918      | 63.8851      | 63.8841      | 63.8841           | 0.8646            | 0.8698            | 0.8698            | 0.8698 |
| THA_295_11.txt | 325.00      | 232.6763    | 70.5918      | 70.1364      | 70.1261      | 70.1245      | 70.1245           | 0.8619            | 0.8680            | 0.8682            | 0.8681 |
| THA_295_11.txt | 330.00      | 231.7007    | 76.5100      | 75.9413      | 75.9267      | 75.9242      | 75.9242           | 0.8590            | 0.8660            | 0.8662            | 0.8661 |
| THA_295_11.txt | 340.00      | 229.6358    | 87.2740      | 86.4553      | 86.4291      | 86.4243      | 86.4243           | 0.8539            | 0.8628            | 0.8630            | 0.8629 |
| THA_295_11.txt | 350.00      | 227.7851    | 97.1048      | 96.0133      | 95.9723      | 95.9642      | 95.9642           | 0.8484            | 0.8591            | 0.8595            | 0.8593 |
| THA_295_11.txt | 365.00      | 225.0796    | 110.5430     | 109.0017     | 108.9315     | 108.9164     | 108.9164          | 0.8408            | 0.8540            | 0.8546            | 0.8544 |
| THA_295_11.txt | 380.00      | 222.5090    | 122.8708     | 120.8388     | 120.7314     | 120.7067     | 120.7067          | 0.8336            | 0.8492            | 0.8501            | 0.8498 |
| THA_295_11.txt | 420.00      | 216.4968    | 152.4162     | 148.9189     | 148.6744     | 148.6105     | 148.6105          | 0.8149            | 0.8366            | 0.8382            | 0.8377 |
| THA_295_11.txt | 470.00      | 210.2252    | 185.2476     | 179.6738     | 179.1837     | 179.0411     | 179.0411          | 0.7933            | 0.8216            | 0.8244            | 0.8237 |
| THA_295_11.txt | 530.00      | 204.1505    | 221.3717     | 213.0654     | 212.1873     | 211.9089     | 211.9089          | 0.7693            | 0.8042            | 0.8086            | 0.8078 |
| THA_295_11.txt | 600.00      | 198.3652    | 260.7299     | 248.9750     | 247.5266     | 247.0338     | 247.0338          | 0.7441            | 0.7854            | 0.7918            | 0.7910 |
| THA_295_11.txt | 680.00      | 193.2082    | 303.7458     | 287.8750     | 285.6687     | 284.8734     | 284.8734          | 0.7176            | 0.7645            | 0.7730            | 0.7725 |

|                |         |          |          |          |          |          |        |        |        |        |
|----------------|---------|----------|----------|----------|----------|----------|--------|--------|--------|--------|
| THA_295_11.txt | 770.00  | 188.5881 | 350.4340 | 329.7758 | 326.6062 | 325.4074 | 0.6909 | 0.7426 | 0.7532 | 0.7532 |
| THA_295_11.txt | 870.00  | 184.4675 | 400.8789 | 374.7673 | 370.4274 | 368.7192 | 0.6645 | 0.7201 | 0.7328 | 0.7333 |
| THA_295_11.txt | 980.00  | 180.8231 | 455.2102 | 423.0070 | 417.2938 | 414.9696 | 0.6387 | 0.6974 | 0.7120 | 0.7133 |
| THA_295_11.txt | 1100.00 | 177.5703 | 513.4101 | 474.4896 | 467.2000 | 464.1517 | 0.6139 | 0.6750 | 0.6913 | 0.6932 |

TAA\_multiTemperature\_candidate2.xlsx - Sheet #7

| x         | y         | z         | Radius  | Charge        | Atom   |
|-----------|-----------|-----------|---------|---------------|--------|
| 8.167250  | -1.147400 | 0.380760  | 1.55000 | -0.4466500000 | 14     |
| 9.576010  | -1.385500 | 1.008700  | 1.70000 | -0.0721640000 | 1 12   |
| 9.628080  | -1.907400 | 2.491800  | 1.70000 | -0.2161900000 | 12     |
| 11.034600 | -2.328800 | 2.794100  | 1.70000 | -0.1968800000 | 410 12 |
| 11.250700 | -2.685800 | 4.223500  | 1.70000 | -0.1816200000 | 12     |
| 10.484700 | -3.893700 | 4.676900  | 1.70000 | -0.1794900000 | 12     |
| 10.790200 | -5.313500 | 3.984600  | 1.70000 | -0.1808300000 | 12     |
| 10.008700 | -6.360900 | 4.696300  | 1.70000 | -0.3215500000 | 12     |
| 2.288060  | 2.518000  | -0.594710 | 1.70000 | -0.3196800000 | 12     |
| 2.675800  | 1.689700  | 0.634210  | 1.70000 | -0.1779000000 | 12     |
| 3.594550  | 2.414400  | 1.628600  | 1.70000 | -0.1746400000 | 12     |
| 4.918910  | 2.943500  | 1.111500  | 1.70000 | -0.1870200000 | 12     |
| 6.143420  | 2.088000  | 1.524500  | 1.70000 | -0.1875700000 | 12     |
| 6.375490  | 0.893180  | 0.598550  | 1.70000 | -0.2162500000 | 12     |
| 7.596920  | 0.081910  | 1.155700  | 1.70000 | -0.0603870000 | 12     |
| 7.294830  | -2.405800 | 0.574490  | 1.70000 | -0.0548790000 | 12     |
| 5.752720  | -2.249700 | 0.382760  | 1.70000 | -0.2106000000 | 12     |
| 5.107000  | -3.605300 | 0.644620  | 1.70000 | -0.2030700000 | 12     |
| 4.914990  | -3.834700 | 2.203900  | 1.70000 | -0.1862200000 | 12     |
| 4.016610  | -5.117900 | 2.529400  | 1.70000 | -0.1806800000 | 12     |
| 3.801730  | -5.355200 | 4.022500  | 1.70000 | -0.1798900000 | 12     |
| 3.012140  | -6.657100 | 4.294200  | 1.70000 | -0.3220400000 | 12     |
| 8.496250  | -0.863880 | -1.090500 | 1.70000 | -0.0531930000 | 12     |
| 7.316000  | -1.042000 | -2.092500 | 1.70000 | -0.2183500000 | 12     |
| 7.658340  | -0.659300 | -3.519400 | 1.70000 | -0.1924000000 | 12     |
| 6.527750  | -0.802120 | -4.430100 | 1.70000 | -0.1895400000 | 12     |
| 5.535710  | 0.321630  | -4.630400 | 1.70000 | -0.1745600000 | 12     |
| 4.477490  | 0.118990  | -5.720500 | 1.70000 | -0.1789000000 | 12     |
| 3.443330  | 1.313600  | -5.697600 | 1.70000 | -0.3197700000 | 12     |
| 10.123500 | -2.179100 | 0.487460  | 1.10000 | 0.1510800000  | 1      |
| 10.183700 | -0.485920 | 0.752560  | 1.10000 | 0.1501400000  | 1      |
| 9.103560  | -2.805100 | 2.681600  | 1.10000 | 0.1455200000  | 1      |
| 9.214420  | -1.041800 | 3.105800  | 1.10000 | 0.1472600000  | 1      |
| 11.368200 | -3.219900 | 2.191100  | 1.10000 | 0.1457500000  | 1      |
| 11.734200 | -1.520100 | 2.500800  | 1.10000 | 0.1573400000  | 1      |
| 12.321300 | -2.977400 | 4.354600  | 1.10000 | 0.1500500000  | 1      |
| 11.071500 | -1.803000 | 4.904700  | 1.10000 | 0.1478500000  | 1      |
| 10.614400 | -4.037600 | 5.784900  | 1.10000 | 0.1322400000  | 1      |
| 9.402470  | -3.749400 | 4.492900  | 1.10000 | 0.1246200000  | 1      |
| 10.461800 | -5.058100 | 2.954700  | 1.10000 | 0.1098300000  | 1      |
| 11.846900 | -5.286900 | 3.801300  | 1.10000 | 0.1073300000  | 1      |
| 8.984160  | -6.110700 | 4.804000  | 1.10000 | 0.1145800000  | 1      |
| 10.031800 | -7.280400 | 4.113100  | 1.10000 | 0.1025100000  | 1      |
| 10.569100 | -6.797400 | 5.638200  | 1.10000 | 0.0843780000  | 1      |
| 1.769090  | 3.500100  | -0.279630 | 1.10000 | 0.0941700000  | 1      |
| 3.129290  | 2.792000  | -1.212700 | 1.10000 | 0.1039900000  | 1      |
| 1.588170  | 2.005700  | -1.238000 | 1.10000 | 0.1052400000  | 1      |
| 1.758960  | 1.306900  | 1.250100  | 1.10000 | 0.1204000000  | 1      |
| 3.202360  | 0.795080  | 0.245750  | 1.10000 | 0.1058200000  | 1      |
| 3.138750  | 3.275600  | 2.081400  | 1.10000 | 0.0996690000  | 1      |
| 3.909050  | 1.600500  | 2.305800  | 1.10000 | 0.1088100000  | 1      |
| 4.901270  | 3.189000  | 0.028309  | 1.10000 | 0.1133800000  | 1      |
| 5.024310  | 3.917900  | 1.608500  | 1.10000 | 0.1112700000  | 1      |
| 7.038360  | 2.781200  | 1.591000  | 1.10000 | 0.0881070000  | 1      |
| 5.923600  | 1.601900  | 2.519300  | 1.10000 | 0.0961400000  | 1      |
| 5.457180  | 0.256650  | 0.436690  | 1.10000 | 0.1067200000  | 1      |
| 6.757680  | 1.336300  | -0.330510 | 1.10000 | 0.0956700000  | 1      |
| 7.403020  | -0.262950 | 2.163300  | 1.10000 | 0.0989680000  | 1      |
| 8.332610  | 0.817690  | 1.258200  | 1.10000 | 0.0969550000  | 1      |
| 7.675530  | -3.142800 | -0.138140 | 1.10000 | 0.1065500000  | 1      |
| 7.448470  | -2.803200 | 1.611900  | 1.10000 | 0.1099000000  | 1      |
| 5.318410  | -1.613600 | 1.158600  | 1.10000 | 0.1271700000  | 1      |
| 5.352780  | -1.928700 | -0.622540 | 1.10000 | 0.1265100000  | 1      |
| 4.171280  | -3.634700 | 0.060715  | 1.10000 | 0.1266000000  | 1      |
| 5.554620  | -4.475400 | 0.179090  | 1.10000 | 0.1209000000  | 1      |
| 5.975230  | -3.793600 | 2.653000  | 1.10000 | 0.1249100000  | 1      |
| 4.490260  | -2.849600 | 2.624800  | 1.10000 | 0.1068400000  | 1      |
| 2.951100  | -5.158900 | 2.058300  | 1.10000 | 0.1008200000  | 1      |
| 4.490860  | -6.082800 | 2.159800  | 1.10000 | 0.1194100000  | 1      |

|          |           |           |         |              |   |
|----------|-----------|-----------|---------|--------------|---|
| 4.785300 | -5.439800 | 4.475300  | 1.10000 | 0.0686190000 | 1 |
| 3.127660 | -4.518900 | 4.496800  | 1.10000 | 0.1159600000 | 1 |
| 3.421670 | -7.584900 | 3.795500  | 1.10000 | 0.1155700000 | 1 |
| 2.835180 | -6.931900 | 5.353200  | 1.10000 | 0.0745290000 | 1 |
| 2.060360 | -6.513300 | 3.857700  | 1.10000 | 0.1227700000 | 1 |
| 9.026630 | 0.092079  | -1.050400 | 1.10000 | 0.1175900000 | 1 |
| 9.212210 | -1.634800 | -1.529500 | 1.10000 | 0.0902110000 | 1 |
| 6.984150 | -2.108300 | -2.044800 | 1.10000 | 0.1254900000 | 1 |
| 6.576020 | -0.374110 | -1.747600 | 1.10000 | 0.1215900000 | 1 |
| 8.094840 | 0.407340  | -3.652600 | 1.10000 | 0.1102900000 | 1 |
| 8.385700 | -1.407900 | -3.866100 | 1.10000 | 0.1227700000 | 1 |
| 7.011110 | -0.879300 | -5.461800 | 1.10000 | 0.0959550000 | 1 |
| 6.270010 | -1.837900 | -4.371000 | 1.10000 | 0.0881460000 | 1 |
| 5.117130 | 0.523970  | -3.604900 | 1.10000 | 0.1018500000 | 1 |
| 6.227050 | 1.162700  | -4.897400 | 1.10000 | 0.1050900000 | 1 |
| 4.882740 | -0.037622 | -6.753700 | 1.10000 | 0.0910520000 | 1 |
| 3.914710 | -0.850620 | -5.655100 | 1.10000 | 0.0935530000 | 1 |
| 4.045500 | 2.267800  | -5.901200 | 1.10000 | 0.1117100000 | 1 |
| 2.683660 | 1.210400  | -6.544500 | 1.10000 | 0.1124100000 | 1 |
| 2.918420 | 1.558400  | -4.730400 | 1.10000 | 0.1123700000 | 1 |

IMoS.cla

```
-----
excelfile      Savefile      Gas
/filefolder/TAA_multiTemperature_candidate2.xlsx /savefolder/THA_SI.txt  N2

DNRCustomRange 0 0
interface 0
fromvalue 7
tovalue 7
red_coef 1.07
Charge 1
radgas 1.5
Mgas 28
Pressure 101325
Mweight 410
Temperature 295
Polarizability 1.7
NrotationsPA 500
NrotationsEHSS 3
NrotationsTM 3
NgastotalEHSS 300000
NgastotalTM 300000
Accommodation 0
Timestep 100
Boxdomain 16
Diffuse? 1
reemvel 1
Other 0
Simplify 0
PA 0
PATSA 0
EHSS/DHSS 0
TM 0
TDHSS 0
qpol 0
LennardJones 1
DTM 0
HEN 4
TeffRange 295 296 297 298.5 300 302 305 308 312 315 320 325 330 340 350 365 380 420 470 530 600 680 770 870 980 1100
EsEc 1
ft_vector 0.33333 0.28885 0.90371 0.90371 0.28885 -0.33333 -0.49486 -0.36437 -0.36437 -0.49486 -0.33333
t_vector 0 0.1 0.2 0.3 0.4 0.5 0.6 0.7 0.8 0.9 1
seed 13
Numthreads 15
Repeatseed 1
DragRG 1
```

## Result of Multistructures Calculation for THA Salt:

IMoS v1.13 RESULTS FILE

File: TAA\_multiTemperature\_candidate2.xlsx      Molecule: THA\_295\_11.txt

Number of atoms: 89

Molecular Weight: 410.00 Da  
Total Charge: 1

The TM Method used is High Field  
Performing TMLJ calculations for: TAA\_multiTemperature\_candidate2.xlsx and molecule THA\_295\_11.txt.

#### Results

##### Summary of ion calculations:

Ko represents reduced mobility!

| Ion            | Teff<br>(K) | CCS<br>(A2) | E/n1<br>(Td) | E/n2<br>(Td) | E/n3<br>(Td) | E/n4<br>(Td) | <Ko1><br>(cm2/Vs) | <Ko2><br>(cm2/Vs) | <Ko3><br>(cm2/Vs) | <Ko4><br>(cm2/Vs) |        |
|----------------|-------------|-------------|--------------|--------------|--------------|--------------|-------------------|-------------------|-------------------|-------------------|--------|
| THA_295_11.txt | 295.00      | 239.4260    | 0.0000       | 0.0000       | 0.0000       | 0.0000       | 0.0000            | 0.8792            | 0.8792            | 0.8792            | 0.8792 |
| THA_295_11.txt | 296.00      | 239.1768    | 12.6434      | 12.6397      | 12.6397      | 12.6397      | 12.6397           | 0.8786            | 0.8789            | 0.8789            | 0.8789 |
| THA_295_11.txt | 297.00      | 238.9365    | 17.8927      | 17.8833      | 17.8833      | 17.8833      | 17.8833           | 0.8780            | 0.8785            | 0.8785            | 0.8785 |
| THA_295_11.txt | 298.50      | 238.5663    | 23.6927      | 23.6724      | 23.6724      | 23.6723      | 23.6723           | 0.8772            | 0.8780            | 0.8780            | 0.8780 |
| THA_295_11.txt | 300.00      | 238.1443    | 28.3391      | 28.3052      | 28.3051      | 28.3051      | 28.3051           | 0.8765            | 0.8776            | 0.8776            | 0.8776 |
| THA_295_11.txt | 302.00      | 237.5882    | 33.5643      | 33.5092      | 33.5089      | 33.5089      | 33.5089           | 0.8757            | 0.8772            | 0.8772            | 0.8772 |
| THA_295_11.txt | 305.00      | 236.8985    | 40.1987      | 40.1064      | 40.1056      | 40.1055      | 40.1055           | 0.8739            | 0.8760            | 0.8760            | 0.8760 |
| THA_295_11.txt | 308.00      | 236.4286    | 45.9671      | 45.8325      | 45.8311      | 45.8309      | 45.8309           | 0.8714            | 0.8741            | 0.8741            | 0.8741 |
| THA_295_11.txt | 312.00      | 235.4980    | 52.6974      | 52.4983      | 52.4956      | 52.4953      | 52.4953           | 0.8692            | 0.8727            | 0.8728            | 0.8727 |
| THA_295_11.txt | 315.00      | 234.7817    | 57.2578      | 57.0052      | 57.0012      | 57.0006      | 57.0006           | 0.8677            | 0.8718            | 0.8719            | 0.8718 |
| THA_295_11.txt | 320.00      | 233.7584    | 64.2410      | 63.8918      | 63.8851      | 63.8841      | 63.8841           | 0.8646            | 0.8698            | 0.8698            | 0.8698 |
| THA_295_11.txt | 325.00      | 232.6763    | 70.5918      | 70.1364      | 70.1261      | 70.1245      | 70.1245           | 0.8619            | 0.8680            | 0.8682            | 0.8681 |
| THA_295_11.txt | 330.00      | 231.7007    | 76.5100      | 75.9413      | 75.9267      | 75.9242      | 75.9242           | 0.8590            | 0.8660            | 0.8662            | 0.8661 |
| THA_295_11.txt | 340.00      | 229.6358    | 87.2740      | 86.4553      | 86.4291      | 86.4243      | 86.4243           | 0.8539            | 0.8628            | 0.8630            | 0.8629 |
| THA_295_11.txt | 350.00      | 227.7851    | 97.1048      | 96.0133      | 95.9723      | 95.9642      | 95.9642           | 0.8484            | 0.8591            | 0.8595            | 0.8593 |
| THA_295_11.txt | 365.00      | 225.0796    | 110.5430     | 109.0017     | 108.9315     | 108.9164     | 108.9164          | 0.8408            | 0.8540            | 0.8546            | 0.8544 |
| THA_295_11.txt | 380.00      | 222.5090    | 122.8708     | 120.8388     | 120.7314     | 120.7067     | 120.7067          | 0.8336            | 0.8492            | 0.8501            | 0.8498 |
| THA_295_11.txt | 420.00      | 216.4968    | 152.4162     | 148.9189     | 148.6744     | 148.6105     | 148.6105          | 0.8149            | 0.8366            | 0.8382            | 0.8377 |

##### Dispersion plot

alpha is obtained by dividing Mobility by zero field Mobility (not reduced)

| Ion            | Ed<br>(Td) | Ec<br>(Td) | alpha<br>(Td) | E/n<br>(Td) |
|----------------|------------|------------|---------------|-------------|
| THA_295_11.txt | 0.0000     | 0.0000     | 0.0000        | 0.0000      |
| THA_295_11.txt | 12.6397    | 0.0005     | -0.0004       | 12.6397     |
| THA_295_11.txt | 17.8833    | 0.0017     | -0.0008       | 17.8833     |
| THA_295_11.txt | 23.6723    | 0.0039     | -0.0014       | 23.6723     |
| THA_295_11.txt | 28.3051    | 0.0060     | -0.0018       | 28.3051     |
| THA_295_11.txt | 33.5089    | 0.0087     | -0.0023       | 33.5089     |
| THA_295_11.txt | 40.1055    | 0.0146     | -0.0036       | 40.1055     |
| THA_295_11.txt | 45.8309    | 0.0263     | -0.0058       | 45.8309     |
| THA_295_11.txt | 52.4953    | 0.0425     | -0.0074       | 52.4953     |
| THA_295_11.txt | 57.0006    | 0.0545     | -0.0084       | 57.0006     |
| THA_295_11.txt | 63.8841    | 0.0791     | -0.0107       | 63.8841     |
| THA_295_11.txt | 70.1245    | 0.1055     | -0.0126       | 70.1245     |
| THA_295_11.txt | 75.9242    | 0.1349     | -0.0149       | 75.9242     |
| THA_295_11.txt | 86.4243    | 0.1906     | -0.0186       | 86.4243     |
| THA_295_11.txt | 95.9642    | 0.2487     | -0.0227       | 95.9642     |
| THA_295_11.txt | 108.9164   | 0.3507     | -0.0283       | 108.9164    |
| THA_295_11.txt | 120.7067   | 0.4609     | -0.0335       | 120.7067    |
| THA_295_11.txt | 148.6105   | 0.7957     | -0.0472       | 148.6105    |

##### LJTM calculation parameters:

Number of loops (itn) = 1  
Number of velocity points (inp) = 5  
Number of random rotations and impact parameters (imp) = 180000  
Total Trajectories = 900000

Max time step = 1.00e-13 second  
Min time step = 1.00e-16 second  
Time step corrector = 100.00

Ratio of potential energy to kinetic energy at the starting of Traj (sw1) = 0.001000  
Maximum value of [1-cosX] at b\_max (cmin) = 0.000100  
Seed = 13  
Time taken is a mere 282.6917 seconds

File: TAA\_multiTemperature\_candidate2.xlsx      Molecule: THA\_460\_1.txt

Number of atoms: 89  
Molecular Weight: 410.00 Da  
Total Charge: 1

The TM Method used is High Field  
 Performing TMLJ calculations for: TAA\_multiTemperature\_candidate2.xlsx and molecule THA\_460\_1.txt.

Results

-----  
 Summary of ion calculations:

Ko represents reduced mobility!

| Ion           | Teff<br>(K) | CCS<br>(A2) | E/n1<br>(Td) | E/n2<br>(Td) | E/n3<br>(Td) | E/n4<br>(Td) | <Ko1><br>(cm2/Vs) | <Ko2><br>(cm2/Vs) | <Ko3><br>(cm2/Vs) | <Ko4><br>(cm2/Vs) |
|---------------|-------------|-------------|--------------|--------------|--------------|--------------|-------------------|-------------------|-------------------|-------------------|
| THA_460_1.txt | 295.00      | 241.1359    | 0.0000       | 0.0000       | 0.0000       | 0.0000       | 0.0000            | 0.8730            | 0.8730            | 0.8730            |
| THA_460_1.txt | 296.00      | 240.8824    | 12.7336      | 12.7299      | 12.7299      | 12.7299      | 12.7299           | 0.8724            | 0.8726            | 0.8726            |
| THA_460_1.txt | 297.00      | 240.6748    | 18.0229      | 18.0138      | 18.0137      | 18.0137      | 18.0137           | 0.8717            | 0.8721            | 0.8721            |
| THA_460_1.txt | 298.50      | 240.2677    | 23.8617      | 23.8418      | 23.8418      | 23.8418      | 23.8418           | 0.8710            | 0.8717            | 0.8717            |
| THA_460_1.txt | 300.00      | 239.8981    | 28.5478      | 28.5148      | 28.5146      | 28.5146      | 28.5146           | 0.8701            | 0.8712            | 0.8712            |
| THA_460_1.txt | 302.00      | 239.3984    | 33.8200      | 33.7664      | 33.7661      | 33.7661      | 33.7661           | 0.8691            | 0.8705            | 0.8705            |
| THA_460_1.txt | 305.00      | 238.6529    | 40.4964      | 40.4062      | 40.4055      | 40.4055      | 40.4055           | 0.8675            | 0.8695            | 0.8695            |
| THA_460_1.txt | 308.00      | 237.9950    | 46.2716      | 46.1396      | 46.1383      | 46.1381      | 46.1381           | 0.8656            | 0.8683            | 0.8683            |
| THA_460_1.txt | 312.00      | 236.9745    | 53.0278      | 52.8316      | 52.8292      | 52.8288      | 52.8288           | 0.8638            | 0.8672            | 0.8672            |
| THA_460_1.txt | 315.00      | 236.2994    | 57.6279      | 57.3794      | 57.3758      | 57.3753      | 57.3753           | 0.8621            | 0.8661            | 0.8661            |
| THA_460_1.txt | 320.00      | 235.1733    | 64.6298      | 64.2854      | 64.2793      | 64.2783      | 64.2783           | 0.8594            | 0.8644            | 0.8644            |
| THA_460_1.txt | 325.00      | 234.0593    | 71.0114      | 70.5615      | 70.5521      | 70.5505      | 70.5505           | 0.8569            | 0.8628            | 0.8628            |
| THA_460_1.txt | 330.00      | 232.9711    | 76.9295      | 76.3668      | 76.3533      | 76.3509      | 76.3509           | 0.8543            | 0.8612            | 0.8612            |
| THA_460_1.txt | 340.00      | 230.9447    | 87.7715      | 86.9608      | 86.9367      | 86.9322      | 86.9322           | 0.8490            | 0.8577            | 0.8579            |
| THA_460_1.txt | 350.00      | 229.0109    | 97.6273      | 96.5442      | 96.5061      | 96.4985      | 96.4985           | 0.8439            | 0.8543            | 0.8545            |
| THA_460_1.txt | 365.00      | 226.2130    | 111.0997     | 109.5647     | 109.4990     | 109.4847     | 109.4847          | 0.8366            | 0.8496            | 0.8501            |
| THA_460_1.txt | 380.00      | 223.5961    | 123.4711     | 121.4416     | 121.3401     | 121.3165     | 121.3165          | 0.8295            | 0.8450            | 0.8458            |
| THA_460_1.txt | 420.00      | 217.4094    | 153.0586     | 149.5439     | 149.3074     | 149.2451     | 149.2451          | 0.8115            | 0.8330            | 0.8346            |
| THA_460_1.txt | 460.00      | 212.2263    | 179.6469     | 174.4651     | 174.0397     | 173.9178     | 173.9178          | 0.7943            | 0.8213            | 0.8238            |
| THA_460_1.txt | 470.00      | 211.0396    | 185.9653     | 180.3415     | 179.8605     | 179.7202     | 179.7202          | 0.7902            | 0.8184            | 0.8212            |
| THA_460_1.txt | 530.00      | 204.8515    | 222.1318     | 213.7105     | 212.8332     | 212.5544     | 212.5544          | 0.7667            | 0.8016            | 0.8061            |

Dispersion plot

alpha is obtained by dividing Mobility by zero field Mobility (not reduced)

| Ion           | Ed<br>(Td) | Ec<br>(Td) | alpha<br>(Td) | E/n<br>(Td) |
|---------------|------------|------------|---------------|-------------|
| THA_460_1.txt | 0.0000     | 0.0000     | 0.0000        | 0.0000      |
| THA_460_1.txt | 12.7299    | 0.0010     | -0.0004       | 12.7299     |
| THA_460_1.txt | 18.0137    | 0.0027     | -0.0010       | 18.0137     |
| THA_460_1.txt | 23.8418    | 0.0047     | -0.0014       | 23.8418     |
| THA_460_1.txt | 28.5146    | 0.0068     | -0.0021       | 28.5146     |
| THA_460_1.txt | 33.7660    | 0.0103     | -0.0028       | 33.7660     |
| THA_460_1.txt | 40.4055    | 0.0167     | -0.0039       | 40.4055     |
| THA_460_1.txt | 46.1381    | 0.0262     | -0.0054       | 46.1381     |
| THA_460_1.txt | 52.8288    | 0.0387     | -0.0066       | 52.8288     |
| THA_460_1.txt | 57.3753    | 0.0494     | -0.0078       | 57.3753     |
| THA_460_1.txt | 64.2783    | 0.0694     | -0.0098       | 64.2783     |
| THA_460_1.txt | 70.5505    | 0.0912     | -0.0116       | 70.5505     |
| THA_460_1.txt | 76.3509    | 0.1149     | -0.0134       | 76.3509     |
| THA_460_1.txt | 86.9322    | 0.1675     | -0.0173       | 86.9322     |
| THA_460_1.txt | 96.4985    | 0.2265     | -0.0212       | 96.4985     |
| THA_460_1.txt | 109.4847   | 0.3271     | -0.0264       | 109.4847    |
| THA_460_1.txt | 121.3165   | 0.4338     | -0.0315       | 121.3165    |
| THA_460_1.txt | 149.2451   | 0.7608     | -0.0446       | 149.2451    |
| THA_460_1.txt | 173.9178   | 1.1400     | -0.0571       | 173.9178    |
| THA_460_1.txt | 179.7202   | 1.2402     | -0.0601       | 179.7202    |
| THA_460_1.txt | 212.5544   | 1.8993     | -0.0776       | 212.5544    |

LJTM calculation parameters:

-----  
 Number of loops (itn) = 1  
 Number of velocity points (inp) = 5  
 Number of random rotations and impact parameters (imp) = 180000  
 Total Trajectories = 900000  
  
 Max time step = 1.00e-13 second  
 Min time step = 1.00e-16 second  
 Time step corrector = 100.00  
  
 Ratio of potential energy to kinetic energy at the starting of Traj (sw1) = 0.001000  
 Maximum value of [1-cosX] at b\_max (cmin) = 0.000100  
 Seed = 13  
 Time taken is a mere 327.3725 seconds

File: TAA\_multiTemperature\_candidate2.xlsx      Molecule: THA\_600\_28.txt



Number of atoms: 89  
Molecular Weight: 410.00 Da  
Total Charge: 1

The TM Method used is High Field  
Performing TMLJ calculations for: TAA\_multiTemperature\_candidate2.xlsx and molecule THA\_600\_28.txt.

Results

Summary of ion calculations:

Ko represents reduced mobility!

| Ion            | Teff<br>(K) | CCS<br>(A2) | E/n1<br>(Td) | E/n2<br>(Td) | E/n3<br>(Td) | E/n4<br>(Td) | <Ko1><br>(cm2/Vs) | <Ko2><br>(cm2/Vs) | <Ko3><br>(cm2/Vs) | <Ko4><br>(cm2/Vs) |        |
|----------------|-------------|-------------|--------------|--------------|--------------|--------------|-------------------|-------------------|-------------------|-------------------|--------|
| THA_600_28.txt | 295.00      | 246.5516    | 0.0000       | 0.0000       | 0.0000       | 0.0000       | 0.0000            | 0.8538            | 0.8538            | 0.8538            | 0.8538 |
| THA_600_28.txt | 470.00      | 216.2376    | 190.5457     | 184.7504     | 184.2378     | 184.0882     | 0.7712            | 0.7990            | 0.8018            | 0.8011            |        |
| THA_600_28.txt | 530.00      | 209.8664    | 227.5698     | 218.9245     | 218.0039     | 217.7106     | 0.7483            | 0.7827            | 0.7871            | 0.7863            |        |
| THA_600_28.txt | 600.00      | 203.9655    | 268.0909     | 255.8849     | 254.3735     | 253.8557     | 0.7237            | 0.7642            | 0.7705            | 0.7698            |        |
| THA_600_28.txt | 680.00      | 198.6962    | 312.3735     | 295.9144     | 293.6151     | 292.7796     | 0.6978            | 0.7437            | 0.7521            | 0.7516            |        |
| THA_600_28.txt | 770.00      | 193.9016    | 360.3076     | 338.8641     | 335.5517     | 334.2869     | 0.6720            | 0.7227            | 0.7331            | 0.7331            |        |
| THA_600_28.txt | 870.00      | 189.6688    | 412.1822     | 385.1020     | 380.5735     | 378.7727     | 0.6463            | 0.7008            | 0.7133            | 0.7138            |        |
| THA_600_28.txt | 980.00      | 185.8967    | 467.9826     | 434.5894     | 428.6263     | 426.1738     | 0.6213            | 0.6788            | 0.6932            | 0.6945            |        |
| THA_600_28.txt | 1100.00     | 182.5431    | 527.7879     | 487.4353     | 479.8266     | 476.6083     | 0.5972            | 0.6571            | 0.6732            | 0.6752            |        |

Dispersion plot

alpha is obtained by dividing Mobility by zero field Mobility (not reduced)

| Ion            | Ed<br>(Td) | Ec<br>(Td) | alpha<br>(Td) | E/n<br>(Td) |
|----------------|------------|------------|---------------|-------------|
| THA_600_28.txt | 0.0000     | 0.0000     | 0.0000        | 0.0000      |
| THA_600_28.txt | 184.0882   | 1.2511     | -0.0617       | 184.0882    |
| THA_600_28.txt | 217.7106   | 1.9293     | -0.0791       | 217.7106    |
| THA_600_28.txt | 253.8557   | 2.8458     | -0.0984       | 253.8557    |
| THA_600_28.txt | 292.7796   | 4.0561     | -0.1197       | 292.7796    |
| THA_600_28.txt | 334.2869   | 5.5653     | -0.1413       | 334.2869    |
| THA_600_28.txt | 378.7727   | 7.4228     | -0.1639       | 378.7727    |
| THA_600_28.txt | 426.1738   | 9.6380     | -0.1866       | 426.1738    |
| THA_600_28.txt | 476.6083   | 12.2319    | -0.2092       | 476.6083    |

LJTM calculation parameters:

Number of loops (itn) = 1  
Number of velocity points (inp) = 5  
Number of random rotations and impact parameters (imp) = 180000  
Total Trajectories = 900000

Max time step = 1.00e-13 second  
Min time step = 1.00e-16 second  
Time step corrector = 100.00

Ratio of potential energy to kinetic energy at the starting of Traj (sw1) = 0.001000  
Maximum value of [1-cosX] at b\_max (cmin) = 0.000100

Seed = 13

MULTI STRUCTURE Dispersion plot

alpha is obtained by dividing Mobility by zero field Mobility (not reduced)

| Teff<br>(Td) | Ed<br>(Td) | Ec<br>(Td) | alpha<br>(Td) | Kho<br>(Td) |
|--------------|------------|------------|---------------|-------------|
| 295          | 0.0000     | 0.0000     | 0.0000        | 0.8792      |
| 296          | 12.6402    | 0.0006     | -0.0004       | 0.8788      |
| 297          | 17.8849    | 0.0018     | -0.0009       | 0.8784      |
| 298.5        | 23.6759    | 0.0043     | -0.0016       | 0.8778      |
| 300          | 28.3114    | 0.0067     | -0.0020       | 0.8774      |
| 302          | 33.5198    | 0.0099     | -0.0026       | 0.8769      |
| 305          | 40.1237    | 0.0167     | -0.0041       | 0.8756      |
| 308          | 45.8551    | 0.0291     | -0.0063       | 0.8736      |
| 312          | 52.5296    | 0.0464     | -0.0080       | 0.8722      |
| 315          | 57.0461    | 0.0595     | -0.0092       | 0.8711      |
| 320          | 63.9438    | 0.0857     | -0.0116       | 0.8690      |
| 325          | 70.2019    | 0.1140     | -0.0137       | 0.8671      |
| 330          | 76.0147    | 0.1449     | -0.0161       | 0.8651      |
| 340          | 86.5628    | 0.2052     | -0.0201       | 0.8615      |
| 350          | 96.1423    | 0.2683     | -0.0245       | 0.8577      |
| 365          | 109.1575   | 0.3780     | -0.0304       | 0.8525      |
| 380          | 121.0209   | 0.4962     | -0.0360       | 0.8475      |
| 420          | 149.0913   | 0.8541     | -0.0503       | 0.8350      |
| 460          | 173.9178   | 1.2622     | -0.0638       | 0.8231      |

|      |          |         |         |        |
|------|----------|---------|---------|--------|
| 470  | 180.0322 | 1.3910  | -0.0683 | 0.8191 |
| 530  | 215.1325 | 2.3289  | -0.0949 | 0.7958 |
| 600  | 253.8557 | 3.7450  | -0.1245 | 0.7698 |
| 680  | 292.7796 | 5.2649  | -0.1451 | 0.7516 |
| 770  | 334.2869 | 7.0418  | -0.1661 | 0.7331 |
| 870  | 378.7727 | 9.1206  | -0.1881 | 0.7138 |
| 980  | 426.1738 | 11.3783 | -0.2101 | 0.6945 |
| 1100 | 476.6083 | 13.8473 | -0.2321 | 0.6752 |

Time taken is a mere 118.0042 seconds

PARAMETERS USED:

Gas: N2  
Reduction Coef: 1.070  
Molecular mass of Gas: 28.00 Da  
Alpha polarization: 1.70 A3  
Radius of gas: 1.50 A  
Temperature: 295 K  
Pressure: 101325 Pa

Lennard Jones parameters for basic

| Atom  | eps(J*10 <sup>21</sup> ) | sigma(A)     |
|-------|--------------------------|--------------|
| H     | 0.4806000000             | 2.3000000000 |
| C     | 0.7449300000             | 3.5000000000 |
| O     | 0.6888600000             | 3.5000000000 |
| N     | 0.9291600000             | 4.2000000000 |
| F     | 0.1922400000             | 3.4000000000 |
| Cs    | 0.5814000000             | 4.2008100000 |
| Na    | 0.4167763200             | 3.5000000000 |
| Cl    | 0.4167763200             | 3.5000000000 |
| I     | 0.6300000000             | 5.4000000000 |
| K     | 0.4167763200             | 3.5000000000 |
| Rb    | 0.4167763200             | 3.5000000000 |
| P     | 0.4167763200             | 3.5000000000 |
| Ca    | 0.4167763200             | 3.5000000000 |
| Li    | 0.4167763200             | 3.5000000000 |
| S     | 0.4167763200             | 3.5000000000 |
| Other | 0.4167763200             | 3.5000000000 |

SUMMARY OF HIGH FIELD CALCULATIONS

FAIMS/DMS Dispersion field curve used

| ft<br>(AU)  | t<br>(s) |
|-------------|----------|
| 0.33333000  | 0.0000   |
| 0.28885000  | 0.1000   |
| 0.90371000  | 0.2000   |
| 0.90371000  | 0.3000   |
| 0.28885000  | 0.4000   |
| -0.33333000 | 0.5000   |
| -0.49486000 | 0.6000   |
| -0.36437000 | 0.7000   |
| -0.36437000 | 0.8000   |
| -0.49486000 | 0.9000   |
| -0.33333000 | 1.0000   |

| Ion            | Teff<br>(K) | CCS<br>(A2) | E/n1<br>(Td) | E/n2<br>(Td) | E/n3<br>(Td) | E/n4<br>(Td) | <Ko1><br>(cm2/Vs) | <Ko2><br>(cm2/Vs) | <Ko3><br>(cm2/Vs) | <Ko4><br>(cm2/Vs) |        |
|----------------|-------------|-------------|--------------|--------------|--------------|--------------|-------------------|-------------------|-------------------|-------------------|--------|
| THA_295_11.txt | 295.00      | 239.4260    | 0.0000       | 0.0000       | 0.0000       | 0.0000       | 0.0000            | 0.8792            | 0.8792            | 0.8792            | 0.8792 |
| THA_295_11.txt | 296.00      | 239.1768    | 12.6434      | 12.6397      | 12.6397      | 12.6397      | 12.6397           | 0.8786            | 0.8789            | 0.8789            | 0.8789 |
| THA_295_11.txt | 297.00      | 238.9365    | 17.8927      | 17.8833      | 17.8833      | 17.8833      | 17.8833           | 0.8780            | 0.8785            | 0.8785            | 0.8785 |
| THA_295_11.txt | 298.50      | 238.5663    | 23.6927      | 23.6724      | 23.6723      | 23.6723      | 23.6723           | 0.8772            | 0.8780            | 0.8780            | 0.8780 |
| THA_295_11.txt | 300.00      | 238.1443    | 28.3391      | 28.3052      | 28.3051      | 28.3051      | 28.3051           | 0.8765            | 0.8776            | 0.8776            | 0.8776 |
| THA_295_11.txt | 302.00      | 237.5882    | 33.5643      | 33.5092      | 33.5089      | 33.5089      | 33.5089           | 0.8757            | 0.8772            | 0.8772            | 0.8772 |
| THA_295_11.txt | 305.00      | 236.8985    | 40.1987      | 40.1064      | 40.1056      | 40.1055      | 40.1055           | 0.8739            | 0.8760            | 0.8760            | 0.8760 |
| THA_295_11.txt | 308.00      | 236.4286    | 45.9671      | 45.8325      | 45.8311      | 45.8309      | 45.8309           | 0.8714            | 0.8741            | 0.8741            | 0.8741 |
| THA_295_11.txt | 312.00      | 235.4980    | 52.6974      | 52.4983      | 52.4956      | 52.4953      | 52.4953           | 0.8692            | 0.8727            | 0.8728            | 0.8727 |
| THA_295_11.txt | 315.00      | 234.7817    | 57.2578      | 57.0052      | 57.0012      | 57.0006      | 57.0006           | 0.8677            | 0.8718            | 0.8719            | 0.8718 |
| THA_295_11.txt | 320.00      | 233.7584    | 64.2410      | 63.8918      | 63.8851      | 63.8841      | 63.8841           | 0.8646            | 0.8698            | 0.8698            | 0.8698 |
| THA_295_11.txt | 325.00      | 232.6763    | 70.5918      | 70.1364      | 70.1261      | 70.1245      | 70.1245           | 0.8619            | 0.8680            | 0.8682            | 0.8681 |
| THA_295_11.txt | 330.00      | 231.7007    | 76.5100      | 75.9413      | 75.9267      | 75.9242      | 75.9242           | 0.8590            | 0.8660            | 0.8662            | 0.8661 |
| THA_295_11.txt | 340.00      | 229.6358    | 87.2740      | 86.4553      | 86.4291      | 86.4243      | 86.4243           | 0.8539            | 0.8628            | 0.8630            | 0.8629 |
| THA_295_11.txt | 350.00      | 227.7851    | 97.1048      | 96.0133      | 95.9723      | 95.9642      | 95.9642           | 0.8484            | 0.8591            | 0.8595            | 0.8593 |
| THA_295_11.txt | 365.00      | 225.0796    | 110.5430     | 109.0017     | 108.9315     | 108.9164     | 108.9164          | 0.8408            | 0.8540            | 0.8546            | 0.8544 |
| THA_295_11.txt | 380.00      | 222.5090    | 122.8708     | 120.8388     | 120.7314     | 120.7067     | 120.7067          | 0.8336            | 0.8492            | 0.8501            | 0.8498 |
| THA_295_11.txt | 420.00      | 216.4968    | 152.4162     | 148.9189     | 148.6744     | 148.6105     | 148.6105          | 0.8149            | 0.8366            | 0.8382            | 0.8377 |

|                        |          |          |          |          |          |        |        |        |        |
|------------------------|----------|----------|----------|----------|----------|--------|--------|--------|--------|
| THA_460_1.txt 295.00   | 241.1359 | 0.0000   | 0.0000   | 0.0000   | 0.0000   | 0.8730 | 0.8730 | 0.8730 | 0.8730 |
| THA_460_1.txt 296.00   | 240.8824 | 12.7336  | 12.7299  | 12.7299  | 12.7299  | 0.8724 | 0.8726 | 0.8726 | 0.8726 |
| THA_460_1.txt 297.00   | 240.6748 | 18.0229  | 18.0138  | 18.0137  | 18.0137  | 0.8717 | 0.8721 | 0.8721 | 0.8721 |
| THA_460_1.txt 298.50   | 240.2677 | 23.8617  | 23.8418  | 23.8418  | 23.8418  | 0.8710 | 0.8717 | 0.8717 | 0.8717 |
| THA_460_1.txt 300.00   | 239.8981 | 28.5478  | 28.5148  | 28.5146  | 28.5146  | 0.8701 | 0.8712 | 0.8712 | 0.8712 |
| THA_460_1.txt 302.00   | 239.3984 | 33.8200  | 33.7664  | 33.7661  | 33.7660  | 0.8691 | 0.8705 | 0.8705 | 0.8705 |
| THA_460_1.txt 305.00   | 238.6529 | 40.4964  | 40.4062  | 40.4055  | 40.4055  | 0.8675 | 0.8695 | 0.8695 | 0.8695 |
| THA_460_1.txt 308.00   | 237.9950 | 46.2716  | 46.1396  | 46.1383  | 46.1381  | 0.8656 | 0.8683 | 0.8683 | 0.8683 |
| THA_460_1.txt 312.00   | 236.9745 | 53.0278  | 52.8316  | 52.8292  | 52.8288  | 0.8638 | 0.8672 | 0.8672 | 0.8672 |
| THA_460_1.txt 315.00   | 236.2994 | 57.6279  | 57.3794  | 57.3758  | 57.3753  | 0.8621 | 0.8661 | 0.8662 | 0.8661 |
| THA_460_1.txt 320.00   | 235.1733 | 64.6298  | 64.2854  | 64.2793  | 64.2783  | 0.8594 | 0.8644 | 0.8645 | 0.8644 |
| THA_460_1.txt 325.00   | 234.0593 | 71.0114  | 70.5615  | 70.5521  | 70.5505  | 0.8569 | 0.8628 | 0.8629 | 0.8628 |
| THA_460_1.txt 330.00   | 232.9711 | 76.9295  | 76.3668  | 76.3533  | 76.3509  | 0.8543 | 0.8612 | 0.8613 | 0.8612 |
| THA_460_1.txt 340.00   | 230.9447 | 87.7715  | 86.9608  | 86.9367  | 86.9322  | 0.8490 | 0.8577 | 0.8579 | 0.8578 |
| THA_460_1.txt 350.00   | 229.0109 | 97.6273  | 96.5442  | 96.5061  | 96.4985  | 0.8439 | 0.8543 | 0.8547 | 0.8545 |
| THA_460_1.txt 365.00   | 226.2130 | 111.0997 | 109.5647 | 109.4990 | 109.4847 | 0.8366 | 0.8496 | 0.8501 | 0.8499 |
| THA_460_1.txt 380.00   | 223.5961 | 123.4711 | 121.4416 | 121.3401 | 121.3165 | 0.8295 | 0.8450 | 0.8458 | 0.8454 |
| THA_460_1.txt 420.00   | 217.4094 | 153.0586 | 149.5439 | 149.3074 | 149.2451 | 0.8115 | 0.8330 | 0.8346 | 0.8341 |
| THA_460_1.txt 460.00   | 212.2263 | 179.6469 | 174.4651 | 174.0397 | 173.9178 | 0.7943 | 0.8213 | 0.8238 | 0.8231 |
| THA_460_1.txt 470.00   | 211.0396 | 185.9653 | 180.3415 | 179.8605 | 179.7202 | 0.7902 | 0.8184 | 0.8212 | 0.8205 |
| THA_460_1.txt 530.00   | 204.8515 | 222.1318 | 213.7105 | 212.8332 | 212.5544 | 0.7667 | 0.8016 | 0.8061 | 0.8053 |
| THA_600_28.txt 295.00  | 246.5516 | 0.0000   | 0.0000   | 0.0000   | 0.0000   | 0.8538 | 0.8538 | 0.8538 | 0.8538 |
| THA_600_28.txt 470.00  | 216.2376 | 190.5457 | 184.7504 | 184.2378 | 184.0882 | 0.7712 | 0.7990 | 0.8018 | 0.8011 |
| THA_600_28.txt 530.00  | 209.8664 | 227.5698 | 218.9245 | 218.0039 | 217.7106 | 0.7483 | 0.7827 | 0.7871 | 0.7863 |
| THA_600_28.txt 600.00  | 203.9655 | 268.0909 | 255.8849 | 254.3735 | 253.8557 | 0.7237 | 0.7642 | 0.7705 | 0.7698 |
| THA_600_28.txt 680.00  | 198.6962 | 312.3735 | 295.9144 | 293.6151 | 292.7796 | 0.6978 | 0.7437 | 0.7521 | 0.7516 |
| THA_600_28.txt 770.00  | 193.9016 | 360.3076 | 338.8641 | 335.5517 | 334.2869 | 0.6720 | 0.7227 | 0.7331 | 0.7331 |
| THA_600_28.txt 870.00  | 189.6688 | 412.1822 | 385.1020 | 380.5735 | 378.7727 | 0.6463 | 0.7008 | 0.7133 | 0.7138 |
| THA_600_28.txt 980.00  | 185.8967 | 467.9826 | 434.5894 | 428.6263 | 426.1738 | 0.6213 | 0.6788 | 0.6932 | 0.6945 |
| THA_600_28.txt 1100.00 | 182.5431 | 527.7879 | 487.4353 | 479.8266 | 476.6083 | 0.5972 | 0.6571 | 0.6732 | 0.6752 |

TAA\_multiTemperature\_candidate2.xlsx - Sheet #7

| x         | y         | z         | Radius  | Charge        | Atom   |
|-----------|-----------|-----------|---------|---------------|--------|
| 8.167250  | -1.147400 | 0.380760  | 1.55000 | -0.4466500000 | 14     |
| 9.576010  | -1.385500 | 1.008700  | 1.70000 | -0.0721640000 | 1 12   |
| 9.628080  | -1.907400 | 2.491800  | 1.70000 | -0.2161900000 | 12     |
| 11.034600 | -2.328800 | 2.794100  | 1.70000 | -0.1968800000 | 410 12 |
| 11.250700 | -2.685800 | 4.223500  | 1.70000 | -0.1816200000 | 12     |
| 10.484700 | -3.893700 | 4.676900  | 1.70000 | -0.1794900000 | 12     |
| 10.790200 | -5.313500 | 3.984600  | 1.70000 | -0.1808300000 | 12     |
| 10.008700 | -6.360900 | 4.696300  | 1.70000 | -0.3215500000 | 12     |
| 2.288060  | 2.518000  | -0.594710 | 1.70000 | -0.3196800000 | 12     |
| 2.675800  | 1.689700  | 0.634210  | 1.70000 | -0.1779000000 | 12     |
| 3.594550  | 2.414400  | 1.628600  | 1.70000 | -0.1746400000 | 12     |
| 4.918910  | 2.943500  | 1.111500  | 1.70000 | -0.1870200000 | 12     |
| 6.143420  | 2.088000  | 1.524500  | 1.70000 | -0.1875700000 | 12     |
| 6.375490  | 0.893180  | 0.598550  | 1.70000 | -0.2162500000 | 12     |
| 7.596920  | 0.081910  | 1.155700  | 1.70000 | -0.0603870000 | 12     |
| 7.294830  | -2.405800 | 0.574490  | 1.70000 | -0.0548790000 | 12     |
| 5.752720  | -2.249700 | 0.382760  | 1.70000 | -0.2106000000 | 12     |
| 5.107000  | -3.605300 | 0.644620  | 1.70000 | -0.2030700000 | 12     |
| 4.914990  | -3.834700 | 2.203900  | 1.70000 | -0.1862200000 | 12     |
| 4.016610  | -5.117900 | 2.529400  | 1.70000 | -0.1806800000 | 12     |
| 3.801730  | -5.355200 | 4.022500  | 1.70000 | -0.1798900000 | 12     |
| 3.012140  | -6.657100 | 4.294200  | 1.70000 | -0.3220400000 | 12     |
| 8.496250  | -0.863880 | -1.090500 | 1.70000 | -0.0531930000 | 12     |
| 7.316000  | -1.042000 | -2.092500 | 1.70000 | -0.2183500000 | 12     |
| 7.658340  | -0.659300 | -3.519400 | 1.70000 | -0.1924000000 | 12     |
| 6.527750  | -0.802120 | -4.430100 | 1.70000 | -0.1895400000 | 12     |
| 5.535710  | 0.321630  | -4.630400 | 1.70000 | -0.1745600000 | 12     |
| 4.477490  | 0.118990  | -5.720500 | 1.70000 | -0.1789000000 | 12     |
| 3.443330  | 1.313600  | -5.697600 | 1.70000 | -0.3197700000 | 12     |
| 10.123500 | -2.179100 | 0.487460  | 1.10000 | 0.1510800000  | 1      |
| 10.183700 | -0.485920 | 0.752560  | 1.10000 | 0.1501400000  | 1      |
| 9.103560  | -2.805100 | 2.681600  | 1.10000 | 0.1455200000  | 1      |
| 9.214420  | -1.041800 | 3.105800  | 1.10000 | 0.1472600000  | 1      |
| 11.368200 | -3.219900 | 2.191100  | 1.10000 | 0.1457500000  | 1      |
| 11.734200 | -1.520100 | 2.500800  | 1.10000 | 0.1573400000  | 1      |
| 12.321300 | -2.977400 | 4.354600  | 1.10000 | 0.1500500000  | 1      |
| 11.071500 | -1.803000 | 4.904700  | 1.10000 | 0.1478500000  | 1      |
| 10.614400 | -4.037600 | 5.784900  | 1.10000 | 0.1322400000  | 1      |
| 9.402470  | -3.749400 | 4.492900  | 1.10000 | 0.1246200000  | 1      |
| 10.461800 | -5.058100 | 2.954700  | 1.10000 | 0.1098300000  | 1      |
| 11.846900 | -5.286900 | 3.801300  | 1.10000 | 0.1073300000  | 1      |

|           |           |           |         |              |   |
|-----------|-----------|-----------|---------|--------------|---|
| 8.984160  | -6.110700 | 4.804000  | 1.10000 | 0.1145800000 | 1 |
| 10.031800 | -7.280400 | 4.113100  | 1.10000 | 0.1025100000 | 1 |
| 10.569100 | -6.797400 | 5.638200  | 1.10000 | 0.0843780000 | 1 |
| 1.769090  | 3.500100  | -0.279630 | 1.10000 | 0.0941700000 | 1 |
| 3.129290  | 2.792000  | -1.212700 | 1.10000 | 0.1039900000 | 1 |
| 1.588170  | 2.005700  | -1.238000 | 1.10000 | 0.1052400000 | 1 |
| 1.758960  | 1.306900  | 1.250100  | 1.10000 | 0.1204000000 | 1 |
| 3.202360  | 0.795080  | 0.245750  | 1.10000 | 0.1058200000 | 1 |
| 3.138750  | 3.275600  | 2.081400  | 1.10000 | 0.0996690000 | 1 |
| 3.909050  | 1.600500  | 2.305800  | 1.10000 | 0.1088100000 | 1 |
| 4.901270  | 3.189000  | 0.028309  | 1.10000 | 0.1133800000 | 1 |
| 5.024310  | 3.917900  | 1.608500  | 1.10000 | 0.1112700000 | 1 |
| 7.038360  | 2.781200  | 1.591000  | 1.10000 | 0.0881070000 | 1 |
| 5.923600  | 1.601900  | 2.519300  | 1.10000 | 0.0961400000 | 1 |
| 5.457180  | 0.256650  | 0.436690  | 1.10000 | 0.1067200000 | 1 |
| 6.757680  | 1.336300  | -0.330510 | 1.10000 | 0.0956700000 | 1 |
| 7.403020  | -0.262950 | 2.163300  | 1.10000 | 0.0989680000 | 1 |
| 8.332610  | 0.817690  | 1.258200  | 1.10000 | 0.0969550000 | 1 |
| 7.675530  | -3.142800 | -0.138140 | 1.10000 | 0.1065500000 | 1 |
| 7.448470  | -2.803200 | 1.611900  | 1.10000 | 0.1099000000 | 1 |
| 5.318410  | -1.613600 | 1.158600  | 1.10000 | 0.1271700000 | 1 |
| 5.352780  | -1.928700 | -0.622540 | 1.10000 | 0.1265100000 | 1 |
| 4.171280  | -3.634700 | 0.060715  | 1.10000 | 0.1266000000 | 1 |
| 5.554620  | -4.475400 | 0.179090  | 1.10000 | 0.1209000000 | 1 |
| 5.975230  | -3.793600 | 2.653000  | 1.10000 | 0.1249100000 | 1 |
| 4.490260  | -2.849600 | 2.624800  | 1.10000 | 0.1068400000 | 1 |
| 2.951100  | -5.158900 | 2.058300  | 1.10000 | 0.1008200000 | 1 |
| 4.490860  | -6.082800 | 2.159800  | 1.10000 | 0.1194100000 | 1 |
| 4.785300  | -5.439800 | 4.475300  | 1.10000 | 0.0686190000 | 1 |
| 3.127660  | -4.518900 | 4.496800  | 1.10000 | 0.1159600000 | 1 |
| 3.421670  | -7.584900 | 3.795500  | 1.10000 | 0.1155700000 | 1 |
| 2.835180  | -6.931900 | 5.353200  | 1.10000 | 0.0745290000 | 1 |
| 2.060360  | -6.513300 | 3.857700  | 1.10000 | 0.1227700000 | 1 |
| 9.026630  | 0.092079  | -1.050400 | 1.10000 | 0.1175900000 | 1 |
| 9.212210  | -1.634800 | -1.529500 | 1.10000 | 0.0902110000 | 1 |
| 6.984150  | -2.108300 | -2.044800 | 1.10000 | 0.1254900000 | 1 |
| 6.576020  | -0.374110 | -1.747600 | 1.10000 | 0.1215900000 | 1 |
| 8.094840  | 0.407340  | -3.652600 | 1.10000 | 0.1102900000 | 1 |
| 8.385700  | -1.407900 | -3.866100 | 1.10000 | 0.1227700000 | 1 |
| 7.011110  | -0.879300 | -5.461800 | 1.10000 | 0.0959550000 | 1 |
| 6.270010  | -1.837900 | -4.371000 | 1.10000 | 0.0881460000 | 1 |
| 5.117130  | 0.523970  | -3.604900 | 1.10000 | 0.1018500000 | 1 |
| 6.227050  | 1.162700  | -4.897400 | 1.10000 | 0.1050900000 | 1 |
| 4.882740  | -0.037622 | -6.753700 | 1.10000 | 0.0910520000 | 1 |
| 3.914710  | -0.850620 | -5.655100 | 1.10000 | 0.0935530000 | 1 |
| 4.045500  | 2.267800  | -5.901200 | 1.10000 | 0.1117100000 | 1 |
| 2.683660  | 1.210400  | -6.544500 | 1.10000 | 0.1124100000 | 1 |
| 2.918420  | 1.558400  | -4.730400 | 1.10000 | 0.1123700000 | 1 |

TAA\_multiTemperature\_candidate2.xlsx - Sheet #8

| x         | y         | z         | Radius  | Charge        | Atom   |
|-----------|-----------|-----------|---------|---------------|--------|
| 8.032490  | -1.879600 | 0.913910  | 1.55000 | -0.4466500000 | 14     |
| 9.230490  | -2.091500 | 1.740600  | 1.70000 | -0.0721640000 | 1 12   |
| 9.053280  | -1.921500 | 3.287700  | 1.70000 | -0.2161900000 | 12     |
| 9.901190  | -3.010800 | 4.164600  | 1.70000 | -0.1968800000 | 410 12 |
| 11.219400 | -2.445100 | 4.709300  | 1.70000 | -0.1816200000 | 12     |
| 10.779500 | -1.615100 | 5.937000  | 1.70000 | -0.1794900000 | 12     |
| 11.976300 | -1.137300 | 6.787800  | 1.70000 | -0.1808300000 | 12     |
| 11.374900 | -0.512880 | 8.076700  | 1.70000 | -0.3215500000 | 12     |
| 2.355350  | 2.342600  | -2.018600 | 1.70000 | -0.3196800000 | 12     |
| 3.540980  | 2.173600  | -0.963540 | 1.70000 | -0.1779000000 | 12     |
| 3.198620  | 1.246900  | 0.246450  | 1.70000 | -0.1746400000 | 12     |
| 3.973450  | 1.501000  | 1.543100  | 1.70000 | -0.1870200000 | 12     |
| 5.508960  | 1.189800  | 1.557500  | 1.70000 | -0.1875700000 | 12     |
| 5.884400  | -0.252320 | 1.123100  | 1.70000 | -0.2162500000 | 12     |
| 7.335860  | -0.510200 | 1.396200  | 1.70000 | -0.0603870000 | 12     |
| 7.168040  | -3.099700 | 1.147200  | 1.70000 | -0.0548790000 | 12     |
| 6.109610  | -3.371200 | 0.032800  | 1.70000 | -0.2106000000 | 12     |
| 4.993680  | -4.251300 | 0.735770  | 1.70000 | -0.2030700000 | 12     |
| 3.807950  | -4.552700 | -0.262030 | 1.70000 | -0.1862200000 | 12     |
| 2.749680  | -5.461000 | 0.478760  | 1.70000 | -0.1806800000 | 12     |
| 3.048900  | -6.948600 | 0.663660  | 1.70000 | -0.1798900000 | 12     |
| 1.753260  | -7.718700 | 1.004000  | 1.70000 | -0.3220400000 | 12     |
| 8.481180  | -1.859500 | -0.538030 | 1.70000 | -0.0531930000 | 12     |
| 7.643960  | -1.132400 | -1.629200 | 1.70000 | -0.2183500000 | 12     |
| 8.342000  | -0.861230 | -2.978000 | 1.70000 | -0.1924000000 | 12     |
| 7.776090  | 0.350670  | -3.861700 | 1.70000 | -0.1895400000 | 12     |
| 6.436390  | 0.084724  | -4.637000 | 1.70000 | -0.1745600000 | 12     |

|           |           |           |         |               |    |
|-----------|-----------|-----------|---------|---------------|----|
| 5.702360  | 1.337200  | -5.053900 | 1.70000 | -0.1789000000 | 12 |
| 4.504100  | 0.837500  | -5.791000 | 1.70000 | -0.3197700000 | 12 |
| 9.678710  | -3.120400 | 1.511000  | 1.10000 | 0.1510800000  | 1  |
| 10.070000 | -1.395000 | 1.448800  | 1.10000 | 0.1501400000  | 1  |
| 8.017890  | -2.078100 | 3.535700  | 1.10000 | 0.1455200000  | 1  |
| 9.362520  | -0.921120 | 3.539000  | 1.10000 | 0.1472600000  | 1  |
| 9.211350  | -3.360800 | 4.981300  | 1.10000 | 0.1457500000  | 1  |
| 10.053400 | -3.896300 | 3.539900  | 1.10000 | 0.1573400000  | 1  |
| 11.823100 | -3.344500 | 5.091200  | 1.10000 | 0.1500500000  | 1  |
| 11.766400 | -1.844200 | 3.889300  | 1.10000 | 0.1478500000  | 1  |
| 10.207200 | -0.768000 | 5.651100  | 1.10000 | 0.1322400000  | 1  |
| 10.162300 | -2.260500 | 6.590600  | 1.10000 | 0.1246200000  | 1  |
| 12.621100 | -1.995100 | 7.093600  | 1.10000 | 0.1098300000  | 1  |
| 12.546500 | -0.375510 | 6.194600  | 1.10000 | 0.1073300000  | 1  |
| 10.788400 | -1.210800 | 8.717200  | 1.10000 | 0.1145800000  | 1  |
| 12.198900 | -0.189490 | 8.738200  | 1.10000 | 0.1025100000  | 1  |
| 10.751100 | 0.373780  | 7.867200  | 1.10000 | 0.0843780000  | 1  |
| 2.121520  | 1.421400  | -2.506800 | 1.10000 | 0.0941700000  | 1  |
| 1.378440  | 2.709600  | -1.544400 | 1.10000 | 0.1039900000  | 1  |
| 2.649090  | 2.980800  | -2.846600 | 1.10000 | 0.1052400000  | 1  |
| 4.535080  | 1.926100  | -1.451600 | 1.10000 | 0.1204000000  | 1  |
| 3.727650  | 3.265000  | -0.694580 | 1.10000 | 0.1058200000  | 1  |
| 2.054710  | 1.345300  | 0.394970  | 1.10000 | 0.0996690000  | 1  |
| 3.188210  | 0.150450  | -0.061510 | 1.10000 | 0.1088100000  | 1  |
| 3.711740  | 2.511600  | 1.945900  | 1.10000 | 0.1133800000  | 1  |
| 3.615550  | 0.796480  | 2.337600  | 1.10000 | 0.1112700000  | 1  |
| 6.022710  | 1.904400  | 0.906250  | 1.10000 | 0.0881070000  | 1  |
| 5.882890  | 1.453600  | 2.616200  | 1.10000 | 0.0961400000  | 1  |
| 5.288960  | -0.928850 | 1.793200  | 1.10000 | 0.1067200000  | 1  |
| 5.631830  | -0.469010 | -0.029130 | 1.10000 | 0.0956700000  | 1  |
| 7.502330  | -0.494440 | 2.511700  | 1.10000 | 0.0989680000  | 1  |
| 7.995100  | 0.381210  | 1.133700  | 1.10000 | 0.0969550000  | 1  |
| 7.819990  | -3.999500 | 1.087900  | 1.10000 | 0.1065500000  | 1  |
| 6.657380  | -2.947200 | 2.085200  | 1.10000 | 0.1099000000  | 1  |
| 5.536180  | -2.470700 | -0.098929 | 1.10000 | 0.1271700000  | 1  |
| 6.417520  | -3.855000 | -0.923170 | 1.10000 | 0.1265100000  | 1  |
| 5.422070  | -5.182600 | 1.076400  | 1.10000 | 0.1266000000  | 1  |
| 4.587960  | -3.717000 | 1.609000  | 1.10000 | 0.1209000000  | 1  |
| 3.237830  | -3.631800 | -0.458940 | 1.10000 | 0.1249100000  | 1  |
| 4.142710  | -5.039000 | -1.240500 | 1.10000 | 0.1068400000  | 1  |
| 2.531120  | -5.068600 | 1.567000  | 1.10000 | 0.1008200000  | 1  |
| 1.778040  | -5.511300 | -0.047999 | 1.10000 | 0.1194100000  | 1  |
| 3.428830  | -7.304900 | -0.331160 | 1.10000 | 0.0686190000  | 1  |
| 3.796810  | -7.065300 | 1.420400  | 1.10000 | 0.1159600000  | 1  |
| 1.004920  | -7.677900 | 0.152680  | 1.10000 | 0.1155700000  | 1  |
| 2.073410  | -8.777300 | 1.055600  | 1.10000 | 0.0745290000  | 1  |
| 1.343950  | -7.346400 | 1.993100  | 1.10000 | 0.1227700000  | 1  |
| 9.400210  | -1.215000 | -0.552380 | 1.10000 | 0.1175900000  | 1  |
| 8.950630  | -2.769200 | -0.922220 | 1.10000 | 0.0902110000  | 1  |
| 6.675210  | -1.617400 | -2.005000 | 1.10000 | 0.1254900000  | 1  |
| 7.365550  | -0.163260 | -1.222500 | 1.10000 | 0.1215900000  | 1  |
| 9.401020  | -0.626050 | -2.651500 | 1.10000 | 0.1102900000  | 1  |
| 8.466110  | -1.811600 | -3.545500 | 1.10000 | 0.1227700000  | 1  |
| 7.692800  | 1.185600  | -3.162700 | 1.10000 | 0.0959550000  | 1  |
| 8.540680  | 0.624870  | -4.618700 | 1.10000 | 0.0881460000  | 1  |
| 6.739560  | -0.455570 | -5.568700 | 1.10000 | 0.1018500000  | 1  |
| 5.732180  | -0.613930 | -4.044300 | 1.10000 | 0.1050900000  | 1  |
| 5.455190  | 2.102500  | -4.216100 | 1.10000 | 0.0910520000  | 1  |
| 6.384120  | 1.889800  | -5.721200 | 1.10000 | 0.0935530000  | 1  |
| 4.770880  | 0.176520  | -6.667100 | 1.10000 | 0.1117100000  | 1  |
| 3.787160  | 0.215030  | -5.153100 | 1.10000 | 0.1124100000  | 1  |
| 4.005980  | 1.735500  | -6.266600 | 1.10000 | 0.1123700000  | 1  |

TAA\_multiTemperature\_candidate2.xlsx - Sheet #9

| x         | y         | z        | Radius  | Charge        | Atom |    |
|-----------|-----------|----------|---------|---------------|------|----|
| 6.682130  | -0.315510 | 1.467300 | 1.55000 | -0.4466500000 |      | 14 |
| 7.585210  | -0.333310 | 2.692400 | 1.70000 | -0.0721640000 | 1    | 12 |
| 7.727350  | -1.708800 | 3.439100 | 1.70000 | -0.2161900000 |      | 12 |
| 8.912860  | -1.685900 | 4.352800 | 1.70000 | -0.1968800000 | 410  | 12 |
| 10.317100 | -2.003100 | 3.772500 | 1.70000 | -0.1816200000 |      | 12 |
| 11.225900 | -2.541700 | 4.907900 | 1.70000 | -0.1794900000 |      | 12 |
| 12.547500 | -3.243200 | 4.416300 | 1.70000 | -0.1808300000 |      | 12 |
| 13.244600 | -2.702900 | 3.159300 | 1.70000 | -0.3215500000 |      | 12 |
| 1.049500  | -4.602800 | 0.672230 | 1.70000 | -0.3196800000 |      | 12 |
| 1.871430  | -3.852600 | 1.704000 | 1.70000 | -0.1779000000 |      | 12 |
| 1.203680  | -2.681000 | 2.468600 | 1.70000 | -0.1746400000 |      | 12 |
| 2.098270  | -1.841300 | 3.335700 | 1.70000 | -0.1870200000 |      | 12 |
| 3.029480  | -0.826830 | 2.637500 | 1.70000 | -0.1875700000 |      | 12 |

|           |           |           |         |               |    |
|-----------|-----------|-----------|---------|---------------|----|
| 4.518220  | -1.180600 | 2.740100  | 1.70000 | -0.2162500000 | 12 |
| 5.214940  | -0.107210 | 1.833400  | 1.70000 | -0.0603870000 | 12 |
| 7.058650  | -1.661600 | 0.754750  | 1.70000 | -0.0548790000 | 12 |
| 6.389540  | -1.933100 | -0.617430 | 1.70000 | -0.2106000000 | 12 |
| 6.816640  | -3.290200 | -1.134900 | 1.70000 | -0.2030700000 | 12 |
| 6.463750  | -4.468200 | -0.188590 | 1.70000 | -0.1862200000 | 12 |
| 6.678710  | -5.846600 | -0.800210 | 1.70000 | -0.1806800000 | 12 |
| 5.308320  | -6.363300 | -1.362600 | 1.70000 | -0.1798900000 | 12 |
| 5.277700  | -7.657700 | -2.311900 | 1.70000 | -0.3220400000 | 12 |
| 7.201490  | 0.899780  | 0.622890  | 1.70000 | -0.0531930000 | 12 |
| 6.360740  | 1.216000  | -0.618560 | 1.70000 | -0.2183500000 | 12 |
| 7.345290  | 1.891100  | -1.621200 | 1.70000 | -0.1924000000 | 12 |
| 6.700140  | 2.534600  | -2.847300 | 1.70000 | -0.1895400000 | 12 |
| 7.671470  | 3.077600  | -3.900500 | 1.70000 | -0.1745600000 | 12 |
| 7.010370  | 3.667500  | -5.174100 | 1.70000 | -0.1789000000 | 12 |
| 7.909370  | 4.337500  | -6.185700 | 1.70000 | -0.3197700000 | 12 |
| 8.663290  | -0.096624 | 2.436300  | 1.10000 | 0.1510800000  | 1  |
| 7.116980  | 0.370630  | 3.416300  | 1.10000 | 0.1501400000  | 1  |
| 7.641760  | -2.626000 | 2.779000  | 1.10000 | 0.1455200000  | 1  |
| 6.712210  | -1.763600 | 3.838100  | 1.10000 | 0.1472600000  | 1  |
| 8.988920  | -0.737680 | 4.950100  | 1.10000 | 0.1457500000  | 1  |
| 8.552970  | -2.523700 | 4.990500  | 1.10000 | 0.1573400000  | 1  |
| 10.371500 | -2.743800 | 3.003100  | 1.10000 | 0.1500500000  | 1  |
| 10.810600 | -1.020200 | 3.462800  | 1.10000 | 0.1478500000  | 1  |
| 11.618200 | -1.631700 | 5.424000  | 1.10000 | 0.1322400000  | 1  |
| 10.616100 | -3.265800 | 5.489200  | 1.10000 | 0.1246200000  | 1  |
| 13.281700 | -3.305800 | 5.192000  | 1.10000 | 0.1098300000  | 1  |
| 12.186900 | -4.320200 | 4.219700  | 1.10000 | 0.1073300000  | 1  |
| 13.998300 | -3.430700 | 2.840800  | 1.10000 | 0.1145800000  | 1  |
| 12.474700 | -2.564700 | 2.228600  | 1.10000 | 0.1025100000  | 1  |
| 13.759900 | -1.728100 | 3.264500  | 1.10000 | 0.0843780000  | 1  |
| 0.692510  | -4.031600 | -0.230540 | 1.10000 | 0.0941700000  | 1  |
| 1.515700  | -5.643900 | 0.520060  | 1.10000 | 0.1039900000  | 1  |
| 0.100234  | -4.869300 | 1.148400  | 1.10000 | 0.1052400000  | 1  |
| 2.053590  | -4.577600 | 2.470700  | 1.10000 | 0.1204000000  | 1  |
| 2.841750  | -3.357500 | 1.301700  | 1.10000 | 0.1058200000  | 1  |
| 0.712967  | -2.007500 | 1.824000  | 1.10000 | 0.0996690000  | 1  |
| 0.408006  | -3.088800 | 3.120600  | 1.10000 | 0.1088100000  | 1  |
| 1.461010  | -1.460100 | 4.164200  | 1.10000 | 0.1133800000  | 1  |
| 2.782050  | -2.568200 | 3.841500  | 1.10000 | 0.1112700000  | 1  |
| 2.589750  | -0.653120 | 1.589300  | 1.10000 | 0.0881070000  | 1  |
| 2.823150  | 0.118390  | 3.157300  | 1.10000 | 0.0961400000  | 1  |
| 4.802650  | -0.973200 | 3.789500  | 1.10000 | 0.1067200000  | 1  |
| 4.789290  | -2.263300 | 2.556500  | 1.10000 | 0.0956700000  | 1  |
| 4.959080  | 0.981130  | 2.299600  | 1.10000 | 0.0989680000  | 1  |
| 4.628910  | -0.310300 | 0.866480  | 1.10000 | 0.0969550000  | 1  |
| 8.233770  | -1.827900 | 0.719630  | 1.10000 | 0.1065500000  | 1  |
| 6.418110  | -2.371900 | 1.355500  | 1.10000 | 0.1099000000  | 1  |
| 5.269940  | -1.760300 | -0.743850 | 1.10000 | 0.1271700000  | 1  |
| 6.765620  | -1.134700 | -1.316100 | 1.10000 | 0.1265100000  | 1  |
| 6.197510  | -3.355400 | -2.097500 | 1.10000 | 0.1266000000  | 1  |
| 7.937380  | -3.265200 | -1.383100 | 1.10000 | 0.1209000000  | 1  |
| 7.120190  | -4.385700 | 0.687550  | 1.10000 | 0.1249100000  | 1  |
| 5.435420  | -4.238500 | 0.188320  | 1.10000 | 0.1068400000  | 1  |
| 7.453810  | -5.948700 | -1.520700 | 1.10000 | 0.1008200000  | 1  |
| 6.864190  | -6.585900 | 0.080820  | 1.10000 | 0.1194100000  | 1  |
| 4.532650  | -6.402600 | -0.503900 | 1.10000 | 0.0686190000  | 1  |
| 4.930470  | -5.541500 | -2.004100 | 1.10000 | 0.1159600000  | 1  |
| 6.133870  | -7.566500 | -3.047400 | 1.10000 | 0.1155700000  | 1  |
| 5.372990  | -8.613000 | -1.722200 | 1.10000 | 0.0745290000  | 1  |
| 4.355770  | -7.600200 | -2.925300 | 1.10000 | 0.1227700000  | 1  |
| 7.328150  | 1.802900  | 1.265800  | 1.10000 | 0.1175900000  | 1  |
| 8.114880  | 0.533680  | 0.095220  | 1.10000 | 0.0902110000  | 1  |
| 5.523030  | 0.561640  | -0.914690 | 1.10000 | 0.1254900000  | 1  |
| 5.831680  | 2.129500  | -0.193430 | 1.10000 | 0.1215900000  | 1  |
| 7.983720  | 2.636400  | -1.075100 | 1.10000 | 0.1102900000  | 1  |
| 8.053070  | 1.045100  | -1.900000 | 1.10000 | 0.1227700000  | 1  |
| 6.144660  | 1.767400  | -3.370000 | 1.10000 | 0.0959550000  | 1  |
| 6.050730  | 3.369900  | -2.545500 | 1.10000 | 0.0881460000  | 1  |
| 8.220610  | 3.954100  | -3.481100 | 1.10000 | 0.1018500000  | 1  |
| 8.367680  | 2.272300  | -4.085400 | 1.10000 | 0.1050900000  | 1  |
| 6.467840  | 2.843600  | -5.689500 | 1.10000 | 0.0910520000  | 1  |
| 6.296860  | 4.463600  | -4.742700 | 1.10000 | 0.0935530000  | 1  |
| 7.491720  | 4.841300  | -6.993100 | 1.10000 | 0.1117100000  | 1  |
| 8.457860  | 5.316000  | -5.825800 | 1.10000 | 0.1124100000  | 1  |
| 8.585350  | 3.567300  | -6.613200 | 1.10000 | 0.1123700000  | 1  |

```

exccfile      Savefile      Gas
/filefolder/TAA_multiTemperature_candidate2.xlsx /savefolder/THA_SI2.txt  N2

DNRCustomRange 0 0
interface 0
fromvalue 7
tovalue 9
red_coef 1.07
Charge 1
radgas 1.5
Mgas 28
Pressure 101325
Mweight 410
Temperature 295
Polarizability 1.7
NrotationsPA 500
NrotationsEHSS 3
NrotationsTM 3
NgastotalEHSS 300000
NgastotalTM 300000
Accommodation 0
Timestep 100
Boxdomain 16
Diffuse? 1
reemvel 1
Other 0
Simplify 0
PA 0
PATSA 0
EHSS/DHSS 0
TM 0
TDHSS 0
qpol 0
LennardJones 1
DTM 0
HEN 4
TeffRange 295 296 297 298.5 300 302 305 308 312 315 320 325 330 340 350 365 380 420 470 530 600 680 770 870 980 1100
EsEc 1
ft_vector 0.33333 0.28885 0.90371 0.90371 0.28885 -0.33333 -0.49486 -0.36437 -0.36437 -0.49486 -0.33333
t_vector 0 0.1 0.2 0.3 0.4 0.5 0.6 0.7 0.8 0.9 1
MultiT 1
MultiTval 295
seed 13
Numthreads 15
Repeatseed 1
DragRG 1

```

## Independent Result for One Structure (295K) of TDA:

MoS v1.13 RESULTS FILE

File: TAA\_multiTemperature\_candidate2.xlsx      Molecule: TDA\_295\_25.txt

Number of atoms: 125  
Molecular Weight: 578.00 Da  
Total Charge: 1

The TM Method used is High Field  
Performing TMLJ calculations for: TAA\_multiTemperature\_candidate2.xlsx and molecule TDA\_295\_25.txt.

Results

Summary of ion calculations:

Ko represents reduced mobility!

| Ion            | Teff<br>(K) | CCS<br>(A2) | E/n1<br>(Td) | E/n2<br>(Td) | E/n3<br>(Td) | E/n4<br>(Td) | <Ko1><br>(cm2/Vs) | <Ko2><br>(cm2/Vs) | <Ko3><br>(cm2/Vs) | <Ko4><br>(cm2/Vs) |
|----------------|-------------|-------------|--------------|--------------|--------------|--------------|-------------------|-------------------|-------------------|-------------------|
| TDA_295_25.txt | 295.00      | 290.7105    | 0.0000       | 0.0000       | 0.0000       | 0.0000       | 0.7173            | 0.7173            | 0.7173            | 0.7173            |
| TDA_295_25.txt | 296.00      | 290.4167    | 15.4967      | 15.4920      | 15.4920      | 15.4920      | 0.7168            | 0.7171            | 0.7171            | 0.7171            |
| TDA_295_25.txt | 297.00      | 290.1149    | 21.9299      | 21.9172      | 21.9171      | 21.9171      | 0.7164            | 0.7168            | 0.7168            | 0.7168            |
| TDA_295_25.txt | 298.50      | 289.7624    | 29.0483      | 29.0197      | 29.0196      | 29.0196      | 0.7154            | 0.7162            | 0.7162            | 0.7162            |
| TDA_295_25.txt | 300.00      | 289.3211    | 34.7535      | 34.7051      | 34.7049      | 34.7049      | 0.7147            | 0.7158            | 0.7158            | 0.7158            |
| TDA_295_25.txt | 302.00      | 288.7962    | 41.1829      | 41.1035      | 41.1030      | 41.1029      | 0.7137            | 0.7151            | 0.7151            | 0.7151            |
| TDA_295_25.txt | 305.00      | 288.0854    | 49.3451      | 49.2111      | 49.2098      | 49.2097      | 0.7119            | 0.7139            | 0.7140            | 0.7140            |
| TDA_295_25.txt | 308.00      | 287.3031    | 56.3845      | 56.1874      | 56.1849      | 56.1847      | 0.7104            | 0.7130            | 0.7130            | 0.7130            |
| TDA_295_25.txt | 312.00      | 286.2142    | 64.6496      | 64.3570      | 64.3523      | 64.3517      | 0.7085            | 0.7119            | 0.7119            | 0.7119            |

|                |         |          |          |          |          |          |        |        |        |        |
|----------------|---------|----------|----------|----------|----------|----------|--------|--------|--------|--------|
| TDA_295_25.txt | 315.00  | 285.5184 | 70.2873  | 69.9166  | 69.9097  | 69.9088  | 0.7068 | 0.7108 | 0.7109 | 0.7108 |
| TDA_295_25.txt | 320.00  | 284.3413 | 78.8783  | 78.3655  | 78.3540  | 78.3523  | 0.7042 | 0.7091 | 0.7092 | 0.7091 |
| TDA_295_25.txt | 325.00  | 283.1958 | 86.7285  | 86.0609  | 86.0433  | 86.0406  | 0.7016 | 0.7074 | 0.7075 | 0.7075 |
| TDA_295_25.txt | 330.00  | 282.0605 | 94.0169  | 93.1826  | 93.1574  | 93.1534  | 0.6990 | 0.7058 | 0.7059 | 0.7059 |
| TDA_295_25.txt | 340.00  | 279.8931 | 107.3768 | 106.1813 | 106.1371 | 106.1292 | 0.6940 | 0.7025 | 0.7027 | 0.7026 |
| TDA_295_25.txt | 350.00  | 277.9259 | 119.5961 | 118.0078 | 117.9391 | 117.9258 | 0.6889 | 0.6989 | 0.6994 | 0.6992 |
| TDA_295_25.txt | 365.00  | 274.9236 | 136.2950 | 134.0601 | 133.9438 | 133.9191 | 0.6819 | 0.6944 | 0.6950 | 0.6948 |
| TDA_295_25.txt | 380.00  | 272.0497 | 151.6429 | 148.7034 | 148.5262 | 148.4859 | 0.6754 | 0.6901 | 0.6910 | 0.6907 |
| TDA_295_25.txt | 420.00  | 265.4318 | 188.6275 | 183.6152 | 183.2213 | 183.1180 | 0.6584 | 0.6786 | 0.6803 | 0.6798 |
| TDA_295_25.txt | 470.00  | 258.5709 | 229.9959 | 222.0867 | 221.3181 | 221.0924 | 0.6389 | 0.6648 | 0.6676 | 0.6670 |
| TDA_295_25.txt | 530.00  | 251.5769 | 275.3691 | 263.6385 | 262.2814 | 261.8453 | 0.6184 | 0.6500 | 0.6545 | 0.6538 |
| TDA_295_25.txt | 600.00  | 245.2578 | 325.4025 | 308.9760 | 306.8050 | 306.0558 | 0.5962 | 0.6330 | 0.6392 | 0.6387 |
| TDA_295_25.txt | 680.00  | 239.5333 | 380.1223 | 358.0880 | 354.8431 | 353.6577 | 0.5734 | 0.6147 | 0.6228 | 0.6226 |
| TDA_295_25.txt | 770.00  | 234.4510 | 439.7612 | 411.2468 | 406.6716 | 404.9214 | 0.5505 | 0.5955 | 0.6054 | 0.6057 |
| TDA_295_25.txt | 870.00  | 229.8945 | 504.3066 | 468.4165 | 462.2271 | 459.7665 | 0.5282 | 0.5762 | 0.5878 | 0.5887 |
| TDA_295_25.txt | 980.00  | 225.8393 | 573.8924 | 529.7777 | 521.7105 | 518.3993 | 0.5066 | 0.5568 | 0.5700 | 0.5716 |
| TDA_295_25.txt | 1100.00 | 222.2003 | 648.5024 | 595.2850 | 585.0624 | 580.7524 | 0.4860 | 0.5379 | 0.5526 | 0.5548 |

#### Dispersion plot

alpha is obtained by dividing Mobility by zero field Mobility (not reduced)

| Ion            | Ed<br>(Td) | Ec<br>(Td) | alpha<br>(Td) | E/n<br>(Td) |
|----------------|------------|------------|---------------|-------------|
| TDA_295_25.txt | 0.0000     | 0.0000     | 0.0000        | 0.0000      |
| TDA_295_25.txt | 15.4920    | 0.0002     | -0.0004       | 15.4920     |
| TDA_295_25.txt | 21.9171    | 0.0011     | -0.0007       | 21.9171     |
| TDA_295_25.txt | 29.0196    | 0.0047     | -0.0016       | 29.0196     |
| TDA_295_25.txt | 34.7049    | 0.0087     | -0.0022       | 34.7049     |
| TDA_295_25.txt | 41.1029    | 0.0149     | -0.0031       | 41.1029     |
| TDA_295_25.txt | 49.2097    | 0.0266     | -0.0047       | 49.2097     |
| TDA_295_25.txt | 56.1847    | 0.0388     | -0.0060       | 56.1847     |
| TDA_295_25.txt | 64.3517    | 0.0556     | -0.0076       | 64.3517     |
| TDA_295_25.txt | 69.9088    | 0.0714     | -0.0091       | 69.9088     |
| TDA_295_25.txt | 78.3523    | 0.1010     | -0.0114       | 78.3523     |
| TDA_295_25.txt | 86.0406    | 0.1334     | -0.0138       | 86.0406     |
| TDA_295_25.txt | 93.1534    | 0.1679     | -0.0160       | 93.1534     |
| TDA_295_25.txt | 106.1292   | 0.2440     | -0.0205       | 106.1292    |
| TDA_295_25.txt | 117.9258   | 0.3348     | -0.0253       | 117.9258    |
| TDA_295_25.txt | 133.9191   | 0.4832     | -0.0315       | 133.9191    |
| TDA_295_25.txt | 148.4859   | 0.6363     | -0.0372       | 148.4859    |
| TDA_295_25.txt | 183.1180   | 1.1069     | -0.0524       | 183.1180    |
| TDA_295_25.txt | 221.0924   | 1.7942     | -0.0701       | 221.0924    |
| TDA_295_25.txt | 261.8453   | 2.6859     | -0.0885       | 261.8453    |
| TDA_295_25.txt | 306.0558   | 3.9043     | -0.1096       | 306.0558    |
| TDA_295_25.txt | 353.6577   | 5.4798     | -0.1320       | 353.6577    |
| TDA_295_25.txt | 404.9214   | 7.4603     | -0.1556       | 404.9214    |
| TDA_295_25.txt | 459.7665   | 9.8660     | -0.1793       | 459.7665    |
| TDA_295_25.txt | 518.3993   | 12.7597    | -0.2032       | 518.3993    |
| TDA_295_25.txt | 580.7524   | 16.1393    | -0.2266       | 580.7524    |

#### LJTM calculation parameters:

Number of loops (itn) = 1  
 Number of velocity points (inp) = 5  
 Number of random rotations and impact parameters (imp) = 180000  
 Total Trajectories = 900000

Max time step = 1.00e-13 second  
 Min time step = 1.00e-16 second  
 Time step corrector = 100.00

Ratio of potential energy to kinetic energy at the starting of Traj (sw1) = 0.001000  
 Maximum value of [1-cosX] at b\_max (cmin) = 0.000100  
 Seed = 13  
 Time taken is a mere 519.5137 seconds

#### PARAMETERS USED:

Gas: N2  
 Reduction Coef: 1.010  
 Molecular mass of Gas: 28.00 Da  
 Alpha polarization: 1.70 A3  
 Radius of gas: 1.50 A  
 Temperature: 295 K  
 Pressure: 101325 Pa

Lennard Jones parameters for basic  
 Atom eps(J\*10<sup>21</sup>) sigma(A)



```

-----
H 0.480600000 2.300000000
C 0.744930000 3.500000000
O 0.688860000 3.500000000
N 0.929160000 4.200000000
F 0.192240000 3.400000000
Cs 0.581400000 4.200810000
Na 0.416776320 3.500000000
Cl 0.416776320 3.500000000
I 0.630000000 5.400000000
K 0.416776320 3.500000000
Rb 0.416776320 3.500000000
P 0.416776320 3.500000000
Ca 0.416776320 3.500000000
Li 0.416776320 3.500000000
S 0.416776320 3.500000000
Other 0.416776320 3.500000000

```

SUMMARY OF HIGH FIELD CALCULATIONS

FAIMS/DMS Dispersion field curve used

```

ft      t
(AU)    (s)
-----
0.33333000 0.0000
0.28885000 0.1000
0.90371000 0.2000
0.90371000 0.3000
0.28885000 0.4000
-0.33333000 0.5000
-0.49486000 0.6000
-0.36437000 0.7000
-0.36437000 0.8000
-0.49486000 0.9000
-0.33333000 1.0000

```

| Ion            | Teff<br>(K) | CCS<br>(A2) | E/n1<br>(Td) | E/n2<br>(Td) | E/n3<br>(Td) | E/n4<br>(Td) | <Ko1><br>(cm2/Vs) | <Ko2><br>(cm2/Vs) | <Ko3><br>(cm2/Vs) | <Ko4><br>(cm2/Vs) |        |
|----------------|-------------|-------------|--------------|--------------|--------------|--------------|-------------------|-------------------|-------------------|-------------------|--------|
| TDA_295_25.txt | 295.00      | 290.7105    | 0.0000       | 0.0000       | 0.0000       | 0.0000       | 0.0000            | 0.7173            | 0.7173            | 0.7173            | 0.7173 |
| TDA_295_25.txt | 296.00      | 290.4167    | 15.4967      | 15.4920      | 15.4920      | 15.4920      | 0.7168            | 0.7171            | 0.7171            | 0.7171            |        |
| TDA_295_25.txt | 297.00      | 290.1149    | 21.9299      | 21.9172      | 21.9172      | 21.9171      | 0.7164            | 0.7168            | 0.7168            | 0.7168            |        |
| TDA_295_25.txt | 298.50      | 289.7624    | 29.0483      | 29.0197      | 29.0197      | 29.0196      | 0.7154            | 0.7162            | 0.7162            | 0.7162            |        |
| TDA_295_25.txt | 300.00      | 289.3211    | 34.7535      | 34.7051      | 34.7049      | 34.7049      | 0.7147            | 0.7158            | 0.7158            | 0.7158            |        |
| TDA_295_25.txt | 302.00      | 288.7962    | 41.1829      | 41.1035      | 41.1030      | 41.1029      | 0.7137            | 0.7151            | 0.7151            | 0.7151            |        |
| TDA_295_25.txt | 305.00      | 288.0854    | 49.3451      | 49.2111      | 49.2098      | 49.2097      | 0.7119            | 0.7139            | 0.7140            | 0.7140            |        |
| TDA_295_25.txt | 308.00      | 287.3031    | 56.3845      | 56.1874      | 56.1849      | 56.1847      | 0.7104            | 0.7130            | 0.7130            | 0.7130            |        |
| TDA_295_25.txt | 312.00      | 286.2142    | 64.6496      | 64.3570      | 64.3523      | 64.3517      | 0.7085            | 0.7119            | 0.7119            | 0.7119            |        |
| TDA_295_25.txt | 315.00      | 285.5184    | 70.2873      | 69.9166      | 69.9097      | 69.9088      | 0.7068            | 0.7108            | 0.7109            | 0.7108            |        |
| TDA_295_25.txt | 320.00      | 284.3413    | 78.8783      | 78.3655      | 78.3540      | 78.3523      | 0.7042            | 0.7091            | 0.7092            | 0.7091            |        |
| TDA_295_25.txt | 325.00      | 283.1958    | 86.7285      | 86.0609      | 86.0433      | 86.0406      | 0.7016            | 0.7074            | 0.7075            | 0.7075            |        |
| TDA_295_25.txt | 330.00      | 282.0605    | 94.0169      | 93.1826      | 93.1574      | 93.1534      | 0.6990            | 0.7058            | 0.7059            | 0.7059            |        |
| TDA_295_25.txt | 340.00      | 279.8931    | 107.3768     | 106.1813     | 106.1371     | 106.1292     | 0.6940            | 0.7025            | 0.7027            | 0.7026            |        |
| TDA_295_25.txt | 350.00      | 277.9259    | 119.5961     | 118.0078     | 117.9391     | 117.9258     | 0.6889            | 0.6989            | 0.6994            | 0.6992            |        |
| TDA_295_25.txt | 365.00      | 274.9236    | 136.2950     | 134.0601     | 133.9438     | 133.9191     | 0.6819            | 0.6944            | 0.6950            | 0.6948            |        |
| TDA_295_25.txt | 380.00      | 272.0497    | 151.6429     | 148.7034     | 148.5262     | 148.4859     | 0.6754            | 0.6901            | 0.6910            | 0.6907            |        |
| TDA_295_25.txt | 420.00      | 265.4318    | 188.6275     | 183.6152     | 183.2213     | 183.1180     | 0.6584            | 0.6786            | 0.6803            | 0.6798            |        |
| TDA_295_25.txt | 470.00      | 258.5709    | 229.9959     | 222.0867     | 221.3181     | 221.0924     | 0.6389            | 0.6648            | 0.6676            | 0.6670            |        |
| TDA_295_25.txt | 530.00      | 251.5769    | 275.3691     | 263.6385     | 262.2814     | 261.8453     | 0.6184            | 0.6500            | 0.6545            | 0.6538            |        |
| TDA_295_25.txt | 600.00      | 245.2578    | 325.4025     | 308.9760     | 306.8050     | 306.0558     | 0.5962            | 0.6330            | 0.6392            | 0.6387            |        |
| TDA_295_25.txt | 680.00      | 239.5333    | 380.1223     | 358.0880     | 354.8431     | 353.6577     | 0.5734            | 0.6147            | 0.6228            | 0.6226            |        |
| TDA_295_25.txt | 770.00      | 234.4510    | 439.7612     | 411.2468     | 406.6716     | 404.9214     | 0.5505            | 0.5955            | 0.6054            | 0.6057            |        |
| TDA_295_25.txt | 870.00      | 229.8945    | 504.3066     | 468.4165     | 462.2271     | 459.7665     | 0.5282            | 0.5762            | 0.5878            | 0.5887            |        |
| TDA_295_25.txt | 980.00      | 225.8393    | 573.8924     | 529.7777     | 521.7105     | 518.3993     | 0.5066            | 0.5568            | 0.5700            | 0.5716            |        |
| TDA_295_25.txt | 1100.00     | 222.2003    | 648.5024     | 595.2850     | 585.0624     | 580.7524     | 0.4860            | 0.5379            | 0.5526            | 0.5548            |        |

TAA\_multiTemperature\_candidate2.xlsx - Sheet #4

| x         | y         | z         | Radius  | Charge        | Atom   |
|-----------|-----------|-----------|---------|---------------|--------|
| 10.740700 | -10.46140 | 0.716860  | 1.55000 | -0.4542700000 | 14     |
| 9.365520  | -11.15800 | 0.975750  | 1.70000 | -0.0589730000 | 1 12   |
| 11.727500 | -10.84750 | 1.883300  | 1.70000 | -0.0552500000 | 12     |
| 11.273900 | -10.83320 | -0.633770 | 1.70000 | -0.0556390000 | 578 12 |
| 10.503400 | -8.953400 | 0.745960  | 1.70000 | -0.0567740000 | 12     |
| 8.196120  | -10.77580 | 0.063620  | 1.70000 | -0.2182700000 | 12     |
| 13.241300 | -10.57670 | 1.612300  | 1.70000 | -0.2176800000 | 12     |

|           |           |           |         |               |    |
|-----------|-----------|-----------|---------|---------------|----|
| 11.197800 | -12.36740 | -0.820460 | 1.70000 | -0.2216600000 | 12 |
| 11.662000 | -7.925480 | 0.596350  | 1.70000 | -0.2160500000 | 12 |
| 6.998940  | -11.63780 | 0.584240  | 1.70000 | -0.1899600000 | 12 |
| 14.174800 | -10.95570 | 2.812900  | 1.70000 | -0.1972700000 | 12 |
| 11.727900 | -12.75470 | -2.165500 | 1.70000 | -0.1854500000 | 12 |
| 11.081900 | -6.468520 | 0.525130  | 1.70000 | -0.2032200000 | 12 |
| 6.067200  | -11.99930 | -0.561490 | 1.70000 | -0.1936200000 | 12 |
| 14.241000 | -9.940030 | 3.934300  | 1.70000 | -0.1970300000 | 12 |
| 11.254200 | -14.17680 | -2.633500 | 1.70000 | -0.1868500000 | 12 |
| 10.386900 | -6.236210 | -0.792990 | 1.70000 | -0.1978400000 | 12 |
| 5.549010  | -10.78690 | -1.332800 | 1.70000 | -0.1839800000 | 12 |
| 14.995900 | -8.651170 | 3.664500  | 1.70000 | -0.1744700000 | 12 |
| 9.836450  | -13.98310 | -3.285700 | 1.70000 | -0.1788700000 | 12 |
| 11.372000 | -6.264820 | -2.040900 | 1.70000 | -0.1826500000 | 12 |
| 4.223920  | -10.14590 | -0.959340 | 1.70000 | -0.1842200000 | 12 |
| 14.889000 | -7.705570 | 4.901900  | 1.70000 | -0.1865100000 | 12 |
| 9.289450  | -15.33140 | -3.823500 | 1.70000 | -0.1801600000 | 12 |
| 10.683900 | -5.950930 | -3.350300 | 1.70000 | -0.1812300000 | 12 |
| 4.005540  | -8.699260 | -1.623400 | 1.70000 | -0.1815900000 | 12 |
| 15.736500 | -6.421420 | 4.646000  | 1.70000 | -0.1845900000 | 12 |
| 8.122270  | -15.04860 | -4.825300 | 1.70000 | -0.1801500000 | 12 |
| 9.713750  | -7.058420 | -3.912500 | 1.70000 | -0.1788200000 | 12 |
| 4.022020  | -8.711810 | -3.136300 | 1.70000 | -0.1710600000 | 12 |
| 15.439100 | -5.612840 | 3.407400  | 1.70000 | -0.1771600000 | 12 |
| 6.973710  | -14.29750 | -4.223300 | 1.70000 | -0.1657700000 | 12 |
| 10.321600 | -8.456960 | -3.953200 | 1.70000 | -0.1743400000 | 12 |
| 4.004880  | -7.258300 | -3.707400 | 1.70000 | -0.1773500000 | 12 |
| 14.018500 | -5.002830 | 3.288400  | 1.70000 | -0.1776300000 | 12 |
| 5.656620  | -14.43660 | -4.983300 | 1.70000 | -0.1759200000 | 12 |
| 9.309950  | -9.470410 | -4.554400 | 1.70000 | -0.1795700000 | 12 |
| 4.113970  | -7.312350 | -5.268700 | 1.70000 | -0.3212300000 | 12 |
| 13.671700 | -3.972390 | 4.371500  | 1.70000 | -0.3203100000 | 12 |
| 4.540760  | -13.59640 | -4.333200 | 1.70000 | -0.3193800000 | 12 |
| 8.037310  | -9.560480 | -3.724900 | 1.70000 | -0.3167000000 | 12 |
| 9.476790  | -12.26990 | 1.079800  | 1.10000 | 0.1479700000  | 1  |
| 9.027790  | -10.93610 | 2.000500  | 1.10000 | 0.1495100000  | 1  |
| 11.318700 | -10.26290 | 2.759100  | 1.10000 | 0.1505000000  | 1  |
| 11.552800 | -11.92700 | 2.194300  | 1.10000 | 0.1472700000  | 1  |
| 10.701000 | -10.29470 | -1.461700 | 1.10000 | 0.1522800000  | 1  |
| 12.368100 | -10.51870 | -0.894080 | 1.10000 | 0.1546800000  | 1  |
| 9.788270  | -8.685960 | -0.057612 | 1.10000 | 0.1482100000  | 1  |
| 9.949270  | -8.649610 | 1.712700  | 1.10000 | 0.1480000000  | 1  |
| 7.941130  | -9.726880 | 0.190130  | 1.10000 | 0.1293200000  | 1  |
| 8.441070  | -11.00880 | -1.011800 | 1.10000 | 0.1239400000  | 1  |
| 13.456000 | -11.33280 | 0.789190  | 1.10000 | 0.1189100000  | 1  |
| 13.550100 | -9.550350 | 1.256100  | 1.10000 | 0.1336000000  | 1  |
| 11.725800 | -12.88060 | -0.003330 | 1.10000 | 0.1230800000  | 1  |
| 10.116400 | -12.61390 | -0.890780 | 1.10000 | 0.1218200000  | 1  |
| 12.191800 | -8.023410 | 1.559200  | 1.10000 | 0.1207300000  | 1  |
| 12.357200 | -8.076310 | -0.254520 | 1.10000 | 0.1315300000  | 1  |
| 7.385240  | -12.56190 | 1.087300  | 1.10000 | 0.1061000000  | 1  |
| 6.501810  | -11.04980 | 1.376600  | 1.10000 | 0.1156300000  | 1  |
| 13.849600 | -11.93540 | 3.180000  | 1.10000 | 0.1062500000  | 1  |
| 15.219500 | -11.05430 | 2.486400  | 1.10000 | 0.1230300000  | 1  |
| 11.537600 | -12.04470 | -2.978700 | 1.10000 | 0.1108700000  | 1  |
| 12.828500 | -12.87270 | -2.070700 | 1.10000 | 0.1074700000  | 1  |
| 10.298500 | -6.206510 | 1.352500  | 1.10000 | 0.1098800000  | 1  |
| 11.895700 | -5.714050 | 0.720600  | 1.10000 | 0.1232900000  | 1  |
| 6.683430  | -12.68900 | -1.220600 | 1.10000 | 0.0959780000  | 1  |
| 5.161450  | -12.64700 | -0.274340 | 1.10000 | 0.1147200000  | 1  |
| 13.221300 | -9.636520 | 4.295600  | 1.10000 | 0.0853470000  | 1  |
| 14.746800 | -10.47440 | 4.802700  | 1.10000 | 0.1204800000  | 1  |
| 11.862300 | -14.50300 | -3.500800 | 1.10000 | 0.0965310000  | 1  |
| 11.143900 | -14.80320 | -1.724900 | 1.10000 | 0.0981120000  | 1  |
| 9.517720  | -6.877500 | -1.003400 | 1.10000 | 0.0870150000  | 1  |
| 9.928620  | -5.227030 | -0.818020 | 1.10000 | 0.1153900000  | 1  |
| 6.268940  | -9.951830 | -1.378100 | 1.10000 | 0.0896280000  | 1  |
| 5.471890  | -11.12420 | -2.434700 | 1.10000 | 0.1114300000  | 1  |
| 16.116600 | -8.751150 | 3.428800  | 1.10000 | 0.1133100000  | 1  |
| 14.521800 | -8.083460 | 2.840400  | 1.10000 | 0.1041400000  | 1  |
| 9.123390  | -13.55270 | -2.496500 | 1.10000 | 0.0995120000  | 1  |
| 10.002700 | -13.27150 | -4.151300 | 1.10000 | 0.1055000000  | 1  |
| 12.225600 | -5.565500 | -1.941500 | 1.10000 | 0.1108900000  | 1  |
| 11.901600 | -7.228790 | -2.125000 | 1.10000 | 0.1070500000  | 1  |
| 3.378360  | -10.84320 | -1.225400 | 1.10000 | 0.1103500000  | 1  |
| 4.114730  | -9.997920 | 0.169100  | 1.10000 | 0.0977480000  | 1  |
| 13.842600 | -7.568550 | 5.141500  | 1.10000 | 0.0717050000  | 1  |
| 15.358000 | -8.180100 | 5.733700  | 1.10000 | 0.0835220000  | 1  |
| 10.205600 | -15.79060 | -4.313200 | 1.10000 | 0.0885920000  | 1  |
| 8.923840  | -15.92940 | -2.962300 | 1.10000 | 0.0835240000  | 1  |

|           |           |           |         |              |   |
|-----------|-----------|-----------|---------|--------------|---|
| 10.044300 | -5.057890 | -3.241900 | 1.10000 | 0.0606510000 | 1 |
| 11.477200 | -5.657910 | -4.117500 | 1.10000 | 0.1094600000 | 1 |
| 3.081560  | -8.349610 | -1.193400 | 1.10000 | 0.1012300000 | 1 |
| 4.852850  | -8.017090 | -1.308000 | 1.10000 | 0.0558290000 | 1 |
| 15.595000 | -5.821340 | 5.573700  | 1.10000 | 0.0943790000 | 1 |
| 16.797200 | -6.735330 | 4.545600  | 1.10000 | 0.1046000000 | 1 |
| 8.543400  | -14.51560 | -5.659200 | 1.10000 | 0.0966740000 | 1 |
| 7.698230  | -15.95470 | -5.265700 | 1.10000 | 0.0952930000 | 1 |
| 8.831840  | -7.016810 | -3.217000 | 1.10000 | 0.0821630000 | 1 |
| 9.369240  | -6.645240 | -4.838200 | 1.10000 | 0.0878050000 | 1 |
| 4.940770  | -9.270810 | -3.599200 | 1.10000 | 0.1059900000 | 1 |
| 3.095530  | -9.234420 | -3.515000 | 1.10000 | 0.0880460000 | 1 |
| 16.124000 | -4.707400 | 3.328400  | 1.10000 | 0.1052200000 | 1 |
| 15.689000 | -6.149530 | 2.498200  | 1.10000 | 0.0978580000 | 1 |
| 6.937660  | -14.61340 | -3.104400 | 1.10000 | 0.0826530000 | 1 |
| 7.237950  | -13.25270 | -4.203200 | 1.10000 | 0.0901030000 | 1 |
| 11.172100 | -8.411990 | -4.628300 | 1.10000 | 0.0991210000 | 1 |
| 10.702600 | -8.741500 | -2.922900 | 1.10000 | 0.0953380000 | 1 |
| 3.024550  | -6.797370 | -3.476200 | 1.10000 | 0.0706920000 | 1 |
| 4.871240  | -6.634150 | -3.379900 | 1.10000 | 0.1052800000 | 1 |
| 13.875100 | -4.526660 | 2.272000  | 1.10000 | 0.1086500000 | 1 |
| 13.341400 | -5.910300 | 3.316200  | 1.10000 | 0.0725830000 | 1 |
| 5.760840  | -14.12390 | -6.034100 | 1.10000 | 0.0979530000 | 1 |
| 5.349820  | -15.50810 | -4.969600 | 1.10000 | 0.0964140000 | 1 |
| 8.982000  | -9.188080 | -5.631300 | 1.10000 | 0.0936640000 | 1 |
| 9.770160  | -10.54180 | -4.658100 | 1.10000 | 0.1067300000 | 1 |
| 5.065120  | -7.877500 | -5.507000 | 1.10000 | 0.1174000000 | 1 |
| 3.175510  | -7.807480 | -5.665000 | 1.10000 | 0.1035200000 | 1 |
| 4.219250  | -6.269720 | -5.652100 | 1.10000 | 0.1053800000 | 1 |
| 13.729100 | -4.358380 | 5.412200  | 1.10000 | 0.0910840000 | 1 |
| 14.349000 | -3.113640 | 4.228700  | 1.10000 | 0.1194800000 | 1 |
| 12.558500 | -3.594780 | 4.242700  | 1.10000 | 0.1038000000 | 1 |
| 4.453570  | -13.77350 | -3.261400 | 1.10000 | 0.1010000000 | 1 |
| 4.806080  | -12.54510 | -4.442800 | 1.10000 | 0.1025200000 | 1 |
| 3.553490  | -13.81550 | -4.745300 | 1.10000 | 0.1101200000 | 1 |
| 7.387430  | -8.610670 | -3.642500 | 1.10000 | 0.0866880000 | 1 |
| 7.391480  | -10.38940 | -4.086700 | 1.10000 | 0.1143100000 | 1 |
| 8.289870  | -9.738930 | -2.699100 | 1.00000 | 0.1054300000 | 1 |

IMoS.cla

-----  
 excelfile Savefile Gas  
 /filefolder/TAA\_multiTemperature\_candidate2.xlsx /savefolder/TDA\_SI.txt N2

DNRCustomRange 0 0  
 interface 0  
 fromvalue 4  
 tovalue 4  
 red\_coef 1.01  
 Charge 1  
 radgas 1.5  
 Mgas 28  
 Pressure 101325  
 Mweight 578  
 Temperature 295  
 Polarizability 1.7  
 NrotationsPA 500  
 NrotationsEHSS 3  
 NrotationsTM 3  
 NgastotalEHSS 300000  
 NgastotalTM 300000  
 Accommodation 0  
 Timestep 100  
 Boxdomain 16  
 Diffuse? 1  
 reemvel 1  
 Other 0  
 Simplify 0  
 PA 0  
 PATSA 0  
 EHSS/DHSS 0  
 TM 0  
 TDHSS 0  
 qpol 0  
 LennardJones 1  
 DTM 0  
 HEN 4  
 TeffRange 295 296 297 298.5 300 302 305 308 312 315 320 325 330 340 350 365 380 420 470 530 600 680 770 870 980 1100  
 EsEc 1

ft\_vector 0.33333 0.28885 0.90371 0.90371 0.28885 -0.33333 -0.49486 -0.36437 -0.36437 -0.49486 -0.33333  
t\_vector 0 0.1 0.2 0.3 0.4 0.5 0.6 0.7 0.8 0.9 1  
seed 13  
Numthreads 15  
Repeatseed 1  
DragRG 1

## Result of Multistuctures Calculation for TDA Salt:

IMoS v1.13 RESULTS FILE

File: TAA\_multiTemperature\_candidate2.xlsx Molecule: TDA\_295\_25.txt

Number of atoms: 125  
Molecular Weight: 578.00 Da  
Total Charge: 1

The TM Method used is High Field  
Performing TMLJ calculations for: TAA\_multiTemperature\_candidate2.xlsx and molecule TDA\_295\_25.txt.

### Results

Summary of ion calculations:

Ko represents reduced mobility!

| Ion            | Teff<br>(K) | CCS<br>(A2) | E/n1<br>(Td) | E/n2<br>(Td) | E/n3<br>(Td) | E/n4<br>(Td) | <Ko1><br>(cm2/Vs) | <Ko2><br>(cm2/Vs) | <Ko3><br>(cm2/Vs) | <Ko4><br>(cm2/Vs) |        |
|----------------|-------------|-------------|--------------|--------------|--------------|--------------|-------------------|-------------------|-------------------|-------------------|--------|
| TDA_295_25.txt | 295.00      | 290.7105    | 0.0000       | 0.0000       | 0.0000       | 0.0000       | 0.0000            | 0.7173            | 0.7173            | 0.7173            | 0.7173 |
| TDA_295_25.txt | 296.00      | 290.4167    | 15.4967      | 15.4920      | 15.4920      | 15.4920      | 0.7168            | 0.7171            | 0.7171            | 0.7171            | 0.7171 |
| TDA_295_25.txt | 297.00      | 290.1149    | 21.9299      | 21.9172      | 21.9171      | 21.9171      | 0.7164            | 0.7168            | 0.7168            | 0.7168            | 0.7168 |
| TDA_295_25.txt | 298.50      | 289.7624    | 29.0483      | 29.0197      | 29.0196      | 29.0196      | 0.7154            | 0.7162            | 0.7162            | 0.7162            | 0.7162 |
| TDA_295_25.txt | 300.00      | 289.3211    | 34.7535      | 34.7051      | 34.7049      | 34.7049      | 0.7147            | 0.7158            | 0.7158            | 0.7158            | 0.7158 |
| TDA_295_25.txt | 302.00      | 288.7962    | 41.1829      | 41.1035      | 41.1030      | 41.1029      | 0.7137            | 0.7151            | 0.7151            | 0.7151            | 0.7151 |
| TDA_295_25.txt | 305.00      | 288.0854    | 49.3451      | 49.2111      | 49.2098      | 49.2097      | 0.7119            | 0.7139            | 0.7140            | 0.7140            | 0.7140 |
| TDA_295_25.txt | 308.00      | 287.3031    | 56.3845      | 56.1874      | 56.1849      | 56.1847      | 0.7104            | 0.7130            | 0.7130            | 0.7130            | 0.7130 |
| TDA_295_25.txt | 312.00      | 286.2142    | 64.6496      | 64.3570      | 64.3523      | 64.3517      | 0.7085            | 0.7119            | 0.7119            | 0.7119            | 0.7119 |
| TDA_295_25.txt | 315.00      | 285.5184    | 70.2873      | 69.9166      | 69.9097      | 69.9088      | 0.7068            | 0.7108            | 0.7109            | 0.7108            | 0.7108 |
| TDA_295_25.txt | 320.00      | 284.3413    | 78.8783      | 78.3655      | 78.3540      | 78.3523      | 0.7042            | 0.7091            | 0.7092            | 0.7092            | 0.7091 |
| TDA_295_25.txt | 325.00      | 283.1958    | 86.7285      | 86.0609      | 86.0433      | 86.0406      | 0.7016            | 0.7074            | 0.7075            | 0.7075            | 0.7075 |
| TDA_295_25.txt | 330.00      | 282.0605    | 94.0169      | 93.1826      | 93.1574      | 93.1534      | 0.6990            | 0.7058            | 0.7059            | 0.7059            | 0.7059 |
| TDA_295_25.txt | 340.00      | 279.8931    | 107.3768     | 106.1813     | 106.1371     | 106.1292     | 0.6940            | 0.7025            | 0.7027            | 0.7026            | 0.7026 |
| TDA_295_25.txt | 350.00      | 277.9259    | 119.5961     | 118.0078     | 117.9391     | 117.9258     | 0.6889            | 0.6989            | 0.6994            | 0.6992            | 0.6992 |
| TDA_295_25.txt | 365.00      | 274.9236    | 136.2950     | 134.0601     | 133.9438     | 133.9191     | 0.6819            | 0.6944            | 0.6950            | 0.6948            | 0.6948 |
| TDA_295_25.txt | 380.00      | 272.0497    | 151.6429     | 148.7034     | 148.5262     | 148.4859     | 0.6754            | 0.6901            | 0.6910            | 0.6907            | 0.6907 |

### Dispersion plot

alpha is obtained by dividing Mobility by zero field Mobility (not reduced)

| Ion            | Ed<br>(Td) | Ec<br>(Td) | alpha<br>(Td) | E/n<br>(Td) |
|----------------|------------|------------|---------------|-------------|
| TDA_295_25.txt | 0.0000     | 0.0000     | 0.0000        | 0.0000      |
| TDA_295_25.txt | 15.4920    | 0.0002     | -0.0004       | 15.4920     |
| TDA_295_25.txt | 21.9171    | 0.0011     | -0.0007       | 21.9171     |
| TDA_295_25.txt | 29.0196    | 0.0047     | -0.0016       | 29.0196     |
| TDA_295_25.txt | 34.7049    | 0.0087     | -0.0022       | 34.7049     |
| TDA_295_25.txt | 41.1029    | 0.0149     | -0.0031       | 41.1029     |
| TDA_295_25.txt | 49.2097    | 0.0266     | -0.0047       | 49.2097     |
| TDA_295_25.txt | 56.1847    | 0.0388     | -0.0060       | 56.1847     |
| TDA_295_25.txt | 64.3517    | 0.0556     | -0.0076       | 64.3517     |
| TDA_295_25.txt | 69.9088    | 0.0714     | -0.0091       | 69.9088     |
| TDA_295_25.txt | 78.3523    | 0.1010     | -0.0114       | 78.3523     |
| TDA_295_25.txt | 86.0406    | 0.1334     | -0.0138       | 86.0406     |
| TDA_295_25.txt | 93.1534    | 0.1679     | -0.0160       | 93.1534     |
| TDA_295_25.txt | 106.1292   | 0.2440     | -0.0205       | 106.1292    |
| TDA_295_25.txt | 117.9258   | 0.3348     | -0.0253       | 117.9258    |
| TDA_295_25.txt | 133.9191   | 0.4832     | -0.0315       | 133.9191    |
| TDA_295_25.txt | 148.4859   | 0.6363     | -0.0372       | 148.4859    |

### LJTM calculation parameters:

Number of loops (itn) = 1  
Number of velocity points (inp) = 5  
Number of random rotations and impact parameters (imp) = 180000  
Total Trajectories = 900000

Max time step = 1.00e-13 second  
 Min time step = 1.00e-16 second  
 Time step corrector = 100.00

Ratio of potential energy to kinetic energy at the starting of Traj (sw1) = 0.001000  
 Maximum value of [1-cosX] at b\_max (cmin) = 0.000100  
 Seed = 13  
 Time taken is a mere 369.6057 seconds

File: TAA\_multiTemperature\_candidate2.xlsx      Molecule: TDA\_400\_23.txt

Number of atoms: 125  
 Molecular Weight: 578.00 Da  
 Total Charge: 1

The TM Method used is High Field  
 Performing TMLJ calculations for: TAA\_multiTemperature\_candidate2.xlsx and molecule TDA\_400\_23.txt.

Results

Summary of ion calculations:  
 Ko represents reduced mobility!

| Ion            | Teff<br>(K) | CCS<br>(A2) | E/n1<br>(Td) | E/n2<br>(Td) | E/n3<br>(Td) | E/n4<br>(Td) | <Ko1><br>(cm2/Vs) | <Ko2><br>(cm2/Vs) | <Ko3><br>(cm2/Vs) | <Ko4><br>(cm2/Vs) |        |
|----------------|-------------|-------------|--------------|--------------|--------------|--------------|-------------------|-------------------|-------------------|-------------------|--------|
| TDA_400_23.txt | 295.00      | 291.5065    | 0.0000       | 0.0000       | 0.0000       | 0.0000       | 0.0000            | 0.7154            | 0.7154            | 0.7154            | 0.7154 |
| TDA_400_23.txt | 296.00      | 291.2570    | 15.5416      | 15.5368      | 15.5368      | 15.5368      | 15.5368           | 0.7148            | 0.7150            | 0.7150            | 0.7150 |
| TDA_400_23.txt | 297.00      | 290.8832    | 21.9879      | 21.9752      | 21.9752      | 21.9752      | 21.9752           | 0.7145            | 0.7149            | 0.7149            | 0.7149 |
| TDA_400_23.txt | 298.50      | 290.5242    | 29.1247      | 29.0960      | 29.0959      | 29.0959      | 29.0959           | 0.7136            | 0.7143            | 0.7143            | 0.7143 |
| TDA_400_23.txt | 300.00      | 290.0654    | 34.8429      | 34.7944      | 34.7942      | 34.7942      | 34.7942           | 0.7129            | 0.7139            | 0.7140            | 0.7140 |
| TDA_400_23.txt | 302.00      | 289.4278    | 41.2729      | 41.1933      | 41.1928      | 41.1927      | 41.1927           | 0.7121            | 0.7136            | 0.7136            | 0.7136 |
| TDA_400_23.txt | 305.00      | 288.9386    | 49.4912      | 49.3572      | 49.3559      | 49.3558      | 49.3558           | 0.7098            | 0.7118            | 0.7118            | 0.7118 |
| TDA_400_23.txt | 308.00      | 288.2065    | 56.5618      | 56.3651      | 56.3626      | 56.3623      | 56.3623           | 0.7081            | 0.7107            | 0.7108            | 0.7108 |
| TDA_400_23.txt | 312.00      | 287.1133    | 64.8526      | 64.5605      | 64.5558      | 64.5552      | 64.5552           | 0.7063            | 0.7096            | 0.7097            | 0.7097 |
| TDA_400_23.txt | 315.00      | 286.3106    | 70.4823      | 70.1114      | 70.1046      | 70.1036      | 70.1036           | 0.7049            | 0.7088            | 0.7089            | 0.7089 |
| TDA_400_23.txt | 320.00      | 285.2323    | 79.1255      | 78.6130      | 78.6015      | 78.5998      | 78.5998           | 0.7020            | 0.7069            | 0.7070            | 0.7069 |
| TDA_400_23.txt | 325.00      | 284.0578    | 86.9925      | 86.3244      | 86.3067      | 86.3040      | 86.3040           | 0.6994            | 0.7052            | 0.7054            | 0.7053 |
| TDA_400_23.txt | 330.00      | 282.9044    | 94.2982      | 93.4633      | 93.4381      | 93.4340      | 93.4340           | 0.6969            | 0.7036            | 0.7038            | 0.7037 |
| TDA_400_23.txt | 340.00      | 280.7813    | 107.7175     | 106.5201     | 106.4755     | 106.4676     | 106.4676          | 0.6918            | 0.7002            | 0.7005            | 0.7004 |
| TDA_400_23.txt | 350.00      | 278.7153    | 119.9358     | 118.3415     | 118.2718     | 118.2584     | 118.2584          | 0.6869            | 0.6970            | 0.6974            | 0.6972 |
| TDA_400_23.txt | 365.00      | 275.6194    | 136.6400     | 134.3943     | 134.2760     | 134.2511     | 134.2511          | 0.6802            | 0.6927            | 0.6933            | 0.6930 |
| TDA_400_23.txt | 380.00      | 272.8906    | 152.1116     | 149.1610     | 148.9816     | 148.9409     | 148.9409          | 0.6733            | 0.6880            | 0.6889            | 0.6886 |
| TDA_400_23.txt | 400.00      | 269.4816    | 171.2878     | 167.3328     | 167.0545     | 166.9862     | 166.9862          | 0.6646            | 0.6820            | 0.6833            | 0.6829 |
| TDA_400_23.txt | 420.00      | 266.2871    | 189.2354     | 184.2076     | 183.8096     | 183.7055     | 183.7055          | 0.6563            | 0.6764            | 0.6781            | 0.6776 |
| TDA_400_23.txt | 470.00      | 259.3981    | 230.7317     | 222.7769     | 221.9953     | 221.7661     | 221.7661          | 0.6369            | 0.6627            | 0.6656            | 0.6650 |

Dispersion plot

alpha is obtained by dividing Mobility by zero field Mobility (not reduced)

| Ion            | Ed<br>(Td) | Ec<br>(Td) | alpha<br>(Td) | E/n<br>(Td) |
|----------------|------------|------------|---------------|-------------|
| TDA_400_23.txt | 0.0000     | 0.0000     | 0.0000        | 0.0000      |
| TDA_400_23.txt | 15.5368    | -0.0001    | -0.0005       | 15.5368     |
| TDA_400_23.txt | 21.9752    | -0.0002    | -0.0006       | 21.9752     |
| TDA_400_23.txt | 29.0959    | 0.0029     | -0.0015       | 29.0959     |
| TDA_400_23.txt | 34.7942    | 0.0071     | -0.0020       | 34.7942     |
| TDA_400_23.txt | 41.1927    | 0.0121     | -0.0025       | 41.1927     |
| TDA_400_23.txt | 49.3558    | 0.0263     | -0.0049       | 49.3558     |
| TDA_400_23.txt | 56.3623    | 0.0416     | -0.0065       | 56.3623     |
| TDA_400_23.txt | 64.5552    | 0.0606     | -0.0080       | 64.5552     |
| TDA_400_23.txt | 70.1036    | 0.0758     | -0.0091       | 70.1036     |
| TDA_400_23.txt | 78.5998    | 0.1093     | -0.0118       | 78.5998     |
| TDA_400_23.txt | 86.3040    | 0.1449     | -0.0141       | 86.3040     |
| TDA_400_23.txt | 93.4340    | 0.1787     | -0.0163       | 93.4340     |
| TDA_400_23.txt | 106.4676   | 0.2527     | -0.0210       | 106.4676    |
| TDA_400_23.txt | 118.2584   | 0.3388     | -0.0254       | 118.2584    |
| TDA_400_23.txt | 134.2511   | 0.4771     | -0.0312       | 134.2511    |
| TDA_400_23.txt | 148.9409   | 0.6350     | -0.0375       | 148.9409    |
| TDA_400_23.txt | 166.9862   | 0.8638     | -0.0454       | 166.9862    |
| TDA_400_23.txt | 183.7055   | 1.1131     | -0.0528       | 183.7055    |
| TDA_400_23.txt | 221.7661   | 1.7966     | -0.0704       | 221.7661    |

LJTM calculation parameters:

Number of loops (itn) = 1  
 Number of velocity points (inp) = 5

Number of random rotations and impact parameters (imp) = 180000

Total Trajectories = 900000

Max time step = 1.00e-13 second

Min time step = 1.00e-16 second

Time step corrector = 100.00

Ratio of potential energy to kinetic energy at the starting of Traj (sw1) = 0.001000

Maximum value of [1-cosX] at b\_max (cmin) = 0.000100

Seed = 13

Time taken is a mere 428.7498 seconds

File: TAA\_multiTemperature\_candidate2.xlsx      Molecule: TDA\_500\_2.txt

Number of atoms: 125

Molecular Weight: 578.00 Da

Total Charge: 1

The TM Method used is High Field

Performing TMLJ calculations for: TAA\_multiTemperature\_candidate2.xlsx and molecule TDA\_500\_2.txt.

#### Results

Summary of ion calculations:

Ko represents reduced mobility!

| Ion           | Teff<br>(K) | CCS<br>(A2) | E/n1<br>(Td) | E/n2<br>(Td) | E/n3<br>(Td) | E/n4<br>(Td) | <Ko1><br>(cm2/Vs) | <Ko2><br>(cm2/Vs) | <Ko3><br>(cm2/Vs) | <Ko4><br>(cm2/Vs) |        |
|---------------|-------------|-------------|--------------|--------------|--------------|--------------|-------------------|-------------------|-------------------|-------------------|--------|
| TDA_500_2.txt | 295.00      | 301.1197    | 0.0000       | 0.0000       | 0.0000       | 0.0000       | 0.0000            | 0.6925            | 0.6925            | 0.6925            | 0.6925 |
| TDA_500_2.txt | 420.00      | 275.9746    | 196.1197     | 190.8643     | 190.4339     | 190.3210     | 0.6333            | 0.6529            | 0.6546            | 0.6541            |        |
| TDA_500_2.txt | 470.00      | 268.8040    | 239.0982     | 230.8018     | 229.9631     | 229.7157     | 0.6146            | 0.6398            | 0.6427            | 0.6421            |        |
| TDA_500_2.txt | 500.00      | 265.2330    | 263.3675     | 253.1431     | 252.0143     | 251.6643     | 0.6039            | 0.6319            | 0.6355            | 0.6349            |        |
| TDA_500_2.txt | 530.00      | 261.9253    | 286.6962     | 274.4627     | 273.0087     | 272.5386     | 0.5940            | 0.6245            | 0.6289            | 0.6283            |        |
| TDA_500_2.txt | 600.00      | 255.4167    | 338.8811     | 321.7585     | 319.4396     | 318.6331     | 0.5725            | 0.6079            | 0.6140            | 0.6136            |        |
| TDA_500_2.txt | 680.00      | 249.5313    | 395.9884     | 373.0522     | 369.6038     | 368.3322     | 0.5504            | 0.5902            | 0.5980            | 0.5979            |        |
| TDA_500_2.txt | 770.00      | 244.1778    | 458.0056     | 428.2939     | 423.4230     | 421.5392     | 0.5286            | 0.5720            | 0.5816            | 0.5820            |        |
| TDA_500_2.txt | 870.00      | 239.4405    | 525.2472     | 487.8673     | 481.2964     | 478.6540     | 0.5071            | 0.5533            | 0.5646            | 0.5656            |        |
| TDA_500_2.txt | 980.00      | 235.1920    | 597.6590     | 551.7257     | 543.1799     | 539.6319     | 0.4865            | 0.5348            | 0.5477            | 0.5492            |        |
| TDA_500_2.txt | 1100.00     | 231.4586    | 675.5230     | 620.1511     | 609.3473     | 604.7416     | 0.4666            | 0.5165            | 0.5307            | 0.5329            |        |

#### Dispersion plot

alpha is obtained by dividing Mobility by zero field Mobility (not reduced)

| Ion           | Ed<br>(Td) | Ec<br>(Td) | alpha<br>(Td) | E/n<br>(Td) |
|---------------|------------|------------|---------------|-------------|
| TDA_500_2.txt | 0.0000     | 0.0000     | 0.0000        | 0.0000      |
| TDA_500_2.txt | 190.3210   | 1.0726     | -0.0555       | 190.3210    |
| TDA_500_2.txt | 229.7157   | 1.7483     | -0.0729       | 229.7157    |
| TDA_500_2.txt | 251.6643   | 2.2259     | -0.0833       | 251.6643    |
| TDA_500_2.txt | 272.5386   | 2.7358     | -0.0928       | 272.5386    |
| TDA_500_2.txt | 318.6331   | 4.0576     | -0.1140       | 318.6331    |
| TDA_500_2.txt | 368.3322   | 5.7780     | -0.1366       | 368.3322    |
| TDA_500_2.txt | 421.5392   | 7.9034     | -0.1596       | 421.5392    |
| TDA_500_2.txt | 478.6540   | 10.4730    | -0.1833       | 478.6540    |
| TDA_500_2.txt | 539.6319   | 13.4817    | -0.2069       | 539.6319    |
| TDA_500_2.txt | 604.7416   | 17.0094    | -0.2305       | 604.7416    |

#### LJTM calculation parameters:

Number of loops (itn) = 1

Number of velocity points (inp) = 5

Number of random rotations and impact parameters (imp) = 180000

Total Trajectories = 900000

Max time step = 1.00e-13 second

Min time step = 1.00e-16 second

Time step corrector = 100.00

Ratio of potential energy to kinetic energy at the starting of Traj (sw1) = 0.001000

Maximum value of [1-cosX] at b\_max (cmin) = 0.000100

Seed = 13

MULTI STRUCTURE Dispersion plot

alpha is obtained by dividing Mobility by zero field Mobility (not reduced)

| Teff | Ed<br>(Td) | Ec<br>(Td) | alpha<br>(Td) | Kho<br>(Td) |
|------|------------|------------|---------------|-------------|
| 295  | 0.0000     | 0.0000     | 0.0000        | 0.7173      |

|       |          |         |         |        |
|-------|----------|---------|---------|--------|
| 296   | 15.4924  | 0.0003  | -0.0004 | 0.7170 |
| 297   | 21.9182  | 0.0012  | -0.0008 | 0.7168 |
| 298.5 | 29.0221  | 0.0049  | -0.0017 | 0.7161 |
| 300   | 34.7091  | 0.0092  | -0.0023 | 0.7157 |
| 302   | 41.1089  | 0.0156  | -0.0032 | 0.7150 |
| 305   | 49.2236  | 0.0280  | -0.0050 | 0.7138 |
| 308   | 56.2067  | 0.0412  | -0.0064 | 0.7127 |
| 312   | 64.3847  | 0.0594  | -0.0081 | 0.7116 |
| 315   | 69.9459  | 0.0759  | -0.0096 | 0.7105 |
| 320   | 78.4112  | 0.1078  | -0.0122 | 0.7086 |
| 325   | 86.1159  | 0.1426  | -0.0146 | 0.7068 |
| 330   | 93.2469  | 0.1792  | -0.0170 | 0.7051 |
| 340   | 106.2742 | 0.2607  | -0.0219 | 0.7017 |
| 350   | 118.1000 | 0.3560  | -0.0267 | 0.6981 |
| 365   | 134.1404 | 0.5095  | -0.0331 | 0.6936 |
| 380   | 148.8542 | 0.6768  | -0.0395 | 0.6890 |
| 400   | 166.9862 | 0.9212  | -0.0480 | 0.6829 |
| 420   | 185.0286 | 1.2867  | -0.0620 | 0.6729 |
| 470   | 227.3308 | 2.5369  | -0.0953 | 0.6489 |
| 500   | 251.6643 | 3.4900  | -0.1150 | 0.6349 |
| 530   | 272.5386 | 4.2715  | -0.1242 | 0.6283 |
| 600   | 318.6331 | 6.0592  | -0.1446 | 0.6136 |
| 680   | 368.3322 | 8.1478  | -0.1665 | 0.5979 |
| 770   | 421.5392 | 10.2911 | -0.1887 | 0.5820 |
| 870   | 478.6540 | 12.6021 | -0.2115 | 0.5656 |
| 980   | 539.6319 | 14.9721 | -0.2343 | 0.5492 |
| 1100  | 604.7416 | 18.0415 | -0.2571 | 0.5329 |

Time taken is a mere 209.6883 seconds

#### PARAMETERS USED:

Gas: N2  
Reduction Coef: 1.010  
Molecular mass of Gas: 28.00 Da  
Alpha polarization: 1.70 A3  
Radius of gas: 1.50 A  
Temperature: 295 K  
Pressure: 101325 Pa

Lennard Jones parameters for basic  
Atom eps( $J \cdot 10^{-21}$ ) sigma(A)

|       |              |              |
|-------|--------------|--------------|
| H     | 0.4806000000 | 2.3000000000 |
| C     | 0.7449300000 | 3.5000000000 |
| O     | 0.6888600000 | 3.5000000000 |
| N     | 0.9291600000 | 4.2000000000 |
| F     | 0.1922400000 | 3.4000000000 |
| Cs    | 0.5814000000 | 4.2008100000 |
| Na    | 0.4167763200 | 3.5000000000 |
| Cl    | 0.4167763200 | 3.5000000000 |
| I     | 0.6300000000 | 5.4000000000 |
| K     | 0.4167763200 | 3.5000000000 |
| Rb    | 0.4167763200 | 3.5000000000 |
| P     | 0.4167763200 | 3.5000000000 |
| Ca    | 0.4167763200 | 3.5000000000 |
| Li    | 0.4167763200 | 3.5000000000 |
| S     | 0.4167763200 | 3.5000000000 |
| Other | 0.4167763200 | 3.5000000000 |

#### SUMMARY OF HIGH FIELD CALCULATIONS

FAIMS/DMS Dispersion field curve used

| ft<br>(AU)  | t<br>(s) |
|-------------|----------|
| 0.33333000  | 0.0000   |
| 0.28885000  | 0.1000   |
| 0.90371000  | 0.2000   |
| 0.90371000  | 0.3000   |
| 0.28885000  | 0.4000   |
| -0.33333000 | 0.5000   |
| -0.49486000 | 0.6000   |
| -0.36437000 | 0.7000   |
| -0.36437000 | 0.8000   |
| -0.49486000 | 0.9000   |
| -0.33333000 | 1.0000   |

Ion Teff CCS E/n1 E/n2 E/n3 E/n4 <Ko1> <Ko2> <Ko3> <Ko4>

| (K)            | (A2)    | (Td)     | (Td)     | (Td)     | (Td)     | (cm2/Vs) | (cm2/Vs) | (cm2/Vs) | (cm2/Vs) |        |
|----------------|---------|----------|----------|----------|----------|----------|----------|----------|----------|--------|
| TDA_295_25.txt | 295.00  | 290.7105 | 0.0000   | 0.0000   | 0.0000   | 0.0000   | 0.7173   | 0.7173   | 0.7173   | 0.7173 |
| TDA_295_25.txt | 296.00  | 290.4167 | 15.4967  | 15.4920  | 15.4920  | 15.4920  | 0.7168   | 0.7171   | 0.7171   | 0.7171 |
| TDA_295_25.txt | 297.00  | 290.1149 | 21.9299  | 21.9172  | 21.9171  | 21.9171  | 0.7164   | 0.7168   | 0.7168   | 0.7168 |
| TDA_295_25.txt | 298.50  | 289.7624 | 29.0483  | 29.0197  | 29.0196  | 29.0196  | 0.7154   | 0.7162   | 0.7162   | 0.7162 |
| TDA_295_25.txt | 300.00  | 289.3211 | 34.7535  | 34.7051  | 34.7049  | 34.7049  | 0.7147   | 0.7158   | 0.7158   | 0.7158 |
| TDA_295_25.txt | 302.00  | 288.7962 | 41.1829  | 41.1035  | 41.1030  | 41.1029  | 0.7137   | 0.7151   | 0.7151   | 0.7151 |
| TDA_295_25.txt | 305.00  | 288.0854 | 49.3451  | 49.2111  | 49.2098  | 49.2097  | 0.7119   | 0.7139   | 0.7140   | 0.7140 |
| TDA_295_25.txt | 308.00  | 287.3031 | 56.3845  | 56.1874  | 56.1849  | 56.1847  | 0.7104   | 0.7130   | 0.7130   | 0.7130 |
| TDA_295_25.txt | 312.00  | 286.2142 | 64.6496  | 64.3570  | 64.3523  | 64.3517  | 0.7085   | 0.7119   | 0.7119   | 0.7119 |
| TDA_295_25.txt | 315.00  | 285.5184 | 70.2873  | 69.9166  | 69.9097  | 69.9088  | 0.7068   | 0.7108   | 0.7109   | 0.7108 |
| TDA_295_25.txt | 320.00  | 284.3413 | 78.8783  | 78.3655  | 78.3540  | 78.3523  | 0.7042   | 0.7091   | 0.7092   | 0.7091 |
| TDA_295_25.txt | 325.00  | 283.1958 | 86.7285  | 86.0609  | 86.0433  | 86.0406  | 0.7016   | 0.7074   | 0.7075   | 0.7075 |
| TDA_295_25.txt | 330.00  | 282.0605 | 94.0169  | 93.1826  | 93.1574  | 93.1534  | 0.6990   | 0.7058   | 0.7059   | 0.7059 |
| TDA_295_25.txt | 340.00  | 279.8931 | 107.3768 | 106.1813 | 106.1371 | 106.1292 | 0.6940   | 0.7025   | 0.7027   | 0.7026 |
| TDA_295_25.txt | 350.00  | 277.9259 | 119.5961 | 118.0078 | 117.9391 | 117.9258 | 0.6889   | 0.6989   | 0.6994   | 0.6992 |
| TDA_295_25.txt | 365.00  | 274.9236 | 136.2950 | 134.0601 | 133.9438 | 133.9191 | 0.6819   | 0.6944   | 0.6950   | 0.6948 |
| TDA_295_25.txt | 380.00  | 272.0497 | 151.6429 | 148.7034 | 148.5262 | 148.4859 | 0.6754   | 0.6901   | 0.6910   | 0.6907 |
| TDA_400_23.txt | 295.00  | 291.5065 | 0.0000   | 0.0000   | 0.0000   | 0.0000   | 0.7154   | 0.7154   | 0.7154   | 0.7154 |
| TDA_400_23.txt | 296.00  | 291.2570 | 15.5416  | 15.5368  | 15.5368  | 15.5368  | 0.7148   | 0.7150   | 0.7150   | 0.7150 |
| TDA_400_23.txt | 297.00  | 290.8832 | 21.9879  | 21.9752  | 21.9752  | 21.9752  | 0.7145   | 0.7149   | 0.7149   | 0.7149 |
| TDA_400_23.txt | 298.50  | 290.5242 | 29.1247  | 29.0960  | 29.0959  | 29.0959  | 0.7136   | 0.7143   | 0.7143   | 0.7143 |
| TDA_400_23.txt | 300.00  | 290.0654 | 34.8429  | 34.7944  | 34.7942  | 34.7942  | 0.7129   | 0.7139   | 0.7140   | 0.7140 |
| TDA_400_23.txt | 302.00  | 289.4278 | 41.1279  | 41.1933  | 41.1928  | 41.1927  | 0.7121   | 0.7136   | 0.7136   | 0.7136 |
| TDA_400_23.txt | 305.00  | 288.9386 | 49.4912  | 49.3572  | 49.3559  | 49.3558  | 0.7098   | 0.7118   | 0.7118   | 0.7118 |
| TDA_400_23.txt | 308.00  | 288.2065 | 56.5618  | 56.3651  | 56.3626  | 56.3623  | 0.7081   | 0.7107   | 0.7108   | 0.7108 |
| TDA_400_23.txt | 312.00  | 287.1133 | 64.8526  | 64.5605  | 64.5558  | 64.5552  | 0.7063   | 0.7096   | 0.7097   | 0.7097 |
| TDA_400_23.txt | 315.00  | 286.3106 | 70.4823  | 70.1114  | 70.1046  | 70.1036  | 0.7049   | 0.7088   | 0.7089   | 0.7089 |
| TDA_400_23.txt | 320.00  | 285.2323 | 79.1255  | 78.6130  | 78.6015  | 78.5998  | 0.7020   | 0.7069   | 0.7070   | 0.7069 |
| TDA_400_23.txt | 325.00  | 284.0578 | 86.9925  | 86.3244  | 86.3067  | 86.3040  | 0.6994   | 0.7052   | 0.7054   | 0.7053 |
| TDA_400_23.txt | 330.00  | 282.9044 | 94.2982  | 93.4633  | 93.4381  | 93.4340  | 0.6969   | 0.7036   | 0.7038   | 0.7037 |
| TDA_400_23.txt | 340.00  | 280.7813 | 107.7175 | 106.5201 | 106.4755 | 106.4676 | 0.6918   | 0.7002   | 0.7005   | 0.7004 |
| TDA_400_23.txt | 350.00  | 278.7153 | 119.9358 | 118.3415 | 118.2718 | 118.2584 | 0.6869   | 0.6970   | 0.6974   | 0.6972 |
| TDA_400_23.txt | 365.00  | 275.6194 | 136.6400 | 134.3943 | 134.2760 | 134.2511 | 0.6802   | 0.6927   | 0.6933   | 0.6930 |
| TDA_400_23.txt | 380.00  | 272.8906 | 152.1116 | 149.1610 | 148.9816 | 148.9409 | 0.6733   | 0.6880   | 0.6889   | 0.6886 |
| TDA_400_23.txt | 400.00  | 269.4816 | 171.2878 | 167.3328 | 167.0545 | 166.9862 | 0.6646   | 0.6820   | 0.6833   | 0.6829 |
| TDA_400_23.txt | 420.00  | 266.2871 | 189.2354 | 184.2076 | 183.8096 | 183.7055 | 0.6563   | 0.6764   | 0.6781   | 0.6776 |
| TDA_400_23.txt | 470.00  | 259.3981 | 230.7317 | 222.7769 | 221.9953 | 221.7661 | 0.6369   | 0.6627   | 0.6656   | 0.6650 |
| TDA_500_2.txt  | 295.00  | 301.1197 | 0.0000   | 0.0000   | 0.0000   | 0.0000   | 0.6925   | 0.6925   | 0.6925   | 0.6925 |
| TDA_500_2.txt  | 420.00  | 275.9746 | 196.1197 | 190.8643 | 190.4339 | 190.3210 | 0.6333   | 0.6529   | 0.6546   | 0.6541 |
| TDA_500_2.txt  | 470.00  | 268.8040 | 239.0982 | 230.8018 | 229.9631 | 229.7157 | 0.6146   | 0.6398   | 0.6427   | 0.6421 |
| TDA_500_2.txt  | 500.00  | 265.2330 | 263.3675 | 253.1431 | 252.0143 | 251.6643 | 0.6039   | 0.6319   | 0.6355   | 0.6349 |
| TDA_500_2.txt  | 530.00  | 261.9253 | 286.6962 | 274.4627 | 273.0087 | 272.5386 | 0.5940   | 0.6245   | 0.6289   | 0.6283 |
| TDA_500_2.txt  | 600.00  | 255.4167 | 338.8811 | 321.7585 | 319.4396 | 318.6331 | 0.5725   | 0.6079   | 0.6140   | 0.6136 |
| TDA_500_2.txt  | 680.00  | 249.5313 | 395.9884 | 373.0522 | 369.6038 | 368.3322 | 0.5504   | 0.5902   | 0.5980   | 0.5979 |
| TDA_500_2.txt  | 770.00  | 244.1778 | 458.0056 | 428.2939 | 423.4230 | 421.5392 | 0.5286   | 0.5720   | 0.5816   | 0.5820 |
| TDA_500_2.txt  | 870.00  | 239.4405 | 525.2472 | 487.8673 | 481.2964 | 478.6540 | 0.5071   | 0.5533   | 0.5646   | 0.5656 |
| TDA_500_2.txt  | 980.00  | 235.1920 | 597.6590 | 551.7257 | 543.1799 | 539.6319 | 0.4865   | 0.5348   | 0.5477   | 0.5492 |
| TDA_500_2.txt  | 1100.00 | 231.4586 | 675.5230 | 620.1511 | 609.3473 | 604.7416 | 0.4666   | 0.5165   | 0.5307   | 0.5329 |

TAA\_multiTemperature\_candidate2.xlsx - Sheet #4

| x         | y         | z         | Radius  | Charge        | Atom |
|-----------|-----------|-----------|---------|---------------|------|
| 10.740700 | -10.46140 | 0.716860  | 1.55000 | -0.4542700000 | 14   |
| 9.365520  | -11.15800 | 0.975750  | 1.70000 | -0.0589730000 | 1    |
| 11.727500 | -10.84750 | 1.883300  | 1.70000 | -0.0552500000 | 12   |
| 11.273900 | -10.83320 | -0.633770 | 1.70000 | -0.0556390000 | 578  |
| 10.503400 | -8.953400 | 0.745960  | 1.70000 | -0.0567740000 | 12   |
| 8.196120  | -10.77580 | 0.063620  | 1.70000 | -0.2182700000 | 12   |
| 13.241300 | -10.57670 | 1.612300  | 1.70000 | -0.2176800000 | 12   |
| 11.197800 | -12.36740 | -0.820460 | 1.70000 | -0.2216600000 | 12   |
| 11.662000 | -7.925480 | 0.596350  | 1.70000 | -0.2160500000 | 12   |
| 6.998940  | -11.63780 | 0.584240  | 1.70000 | -0.1899600000 | 12   |
| 14.174800 | -10.95570 | 2.812900  | 1.70000 | -0.1972700000 | 12   |
| 11.727900 | -12.75470 | -2.165500 | 1.70000 | -0.1854500000 | 12   |
| 11.081900 | -6.468520 | 0.525130  | 1.70000 | -0.2032200000 | 12   |
| 6.067200  | -11.99930 | -0.561490 | 1.70000 | -0.1936200000 | 12   |
| 14.241000 | -9.940030 | 3.934300  | 1.70000 | -0.1970300000 | 12   |
| 11.254200 | -14.17680 | -2.633500 | 1.70000 | -0.1868500000 | 12   |
| 10.386900 | -6.236210 | -0.792990 | 1.70000 | -0.1978400000 | 12   |
| 5.549010  | -10.78690 | -1.332800 | 1.70000 | -0.1839800000 | 12   |
| 14.995900 | -8.651170 | 3.664500  | 1.70000 | -0.1744700000 | 12   |
| 9.836450  | -13.98310 | -3.285700 | 1.70000 | -0.1788700000 | 12   |
| 11.372000 | -6.264820 | -2.040900 | 1.70000 | -0.1826500000 | 12   |



|           |           |           |         |               |    |
|-----------|-----------|-----------|---------|---------------|----|
| 4.223920  | -10.14590 | -0.959340 | 1.70000 | -0.1842200000 | 12 |
| 14.889000 | -7.705570 | 4.901900  | 1.70000 | -0.1865100000 | 12 |
| 9.289450  | -15.33140 | -3.823500 | 1.70000 | -0.1801600000 | 12 |
| 10.683900 | -5.950930 | -3.350300 | 1.70000 | -0.1812300000 | 12 |
| 4.005540  | -8.699260 | -1.623400 | 1.70000 | -0.1815900000 | 12 |
| 15.736500 | -6.421420 | 4.646000  | 1.70000 | -0.1845900000 | 12 |
| 8.122270  | -15.04860 | -4.825300 | 1.70000 | -0.1801500000 | 12 |
| 9.713750  | -7.058420 | -3.912500 | 1.70000 | -0.1788200000 | 12 |
| 4.022020  | -8.711810 | -3.136300 | 1.70000 | -0.1710600000 | 12 |
| 15.439100 | -5.612840 | 3.407400  | 1.70000 | -0.1771600000 | 12 |
| 6.973710  | -14.29750 | -4.223300 | 1.70000 | -0.1657700000 | 12 |
| 10.321600 | -8.456960 | -3.953200 | 1.70000 | -0.1743400000 | 12 |
| 4.004880  | -7.258300 | -3.707400 | 1.70000 | -0.1773500000 | 12 |
| 14.018500 | -5.002830 | 3.288400  | 1.70000 | -0.1776300000 | 12 |
| 5.656620  | -14.43660 | -4.983300 | 1.70000 | -0.1759200000 | 12 |
| 9.309950  | -9.470410 | -4.554400 | 1.70000 | -0.1795700000 | 12 |
| 4.113970  | -7.312350 | -5.268700 | 1.70000 | -0.3212300000 | 12 |
| 13.671700 | -3.972390 | 4.371500  | 1.70000 | -0.3203100000 | 12 |
| 4.540760  | -13.59640 | -4.333200 | 1.70000 | -0.3193800000 | 12 |
| 8.037310  | -9.560480 | -3.724900 | 1.70000 | -0.3167000000 | 12 |
| 9.476790  | -12.26990 | 1.079800  | 1.10000 | 0.1479700000  | 1  |
| 9.027790  | -10.93610 | 2.000500  | 1.10000 | 0.1495100000  | 1  |
| 11.318700 | -10.26290 | 2.759100  | 1.10000 | 0.1505000000  | 1  |
| 11.552800 | -11.92700 | 2.194300  | 1.10000 | 0.1472700000  | 1  |
| 10.701000 | -10.29470 | -1.461700 | 1.10000 | 0.1522800000  | 1  |
| 12.368100 | -10.51870 | -0.894080 | 1.10000 | 0.1546800000  | 1  |
| 9.788270  | -8.685960 | -0.057612 | 1.10000 | 0.1482100000  | 1  |
| 9.949270  | -8.649610 | 1.712700  | 1.10000 | 0.1480000000  | 1  |
| 7.941130  | -9.726880 | 0.190130  | 1.10000 | 0.1293200000  | 1  |
| 8.441070  | -11.00880 | -1.011800 | 1.10000 | 0.1239400000  | 1  |
| 13.456000 | -11.33280 | 0.789190  | 1.10000 | 0.1189100000  | 1  |
| 13.550100 | -9.550350 | 1.256100  | 1.10000 | 0.1336000000  | 1  |
| 11.725800 | -12.88060 | -0.003330 | 1.10000 | 0.1230800000  | 1  |
| 10.116400 | -12.61390 | -0.890780 | 1.10000 | 0.1218200000  | 1  |
| 12.191800 | -8.023410 | 1.559200  | 1.10000 | 0.1207300000  | 1  |
| 12.357200 | -8.076310 | -0.254520 | 1.10000 | 0.1315300000  | 1  |
| 7.385240  | -12.56190 | 1.087300  | 1.10000 | 0.1061000000  | 1  |
| 6.501810  | -11.04980 | 1.376600  | 1.10000 | 0.1156300000  | 1  |
| 13.849600 | -11.93540 | 3.180000  | 1.10000 | 0.1062500000  | 1  |
| 15.219500 | -11.05430 | 2.486400  | 1.10000 | 0.1230300000  | 1  |
| 11.537600 | -12.04470 | -2.978700 | 1.10000 | 0.1108700000  | 1  |
| 12.828500 | -12.87270 | -2.070700 | 1.10000 | 0.1074700000  | 1  |
| 10.298500 | -6.206510 | 1.352500  | 1.10000 | 0.1098800000  | 1  |
| 11.895700 | -5.714050 | 0.720600  | 1.10000 | 0.1232900000  | 1  |
| 6.683430  | -12.68900 | -1.220600 | 1.10000 | 0.0959780000  | 1  |
| 5.161450  | -12.64700 | -0.274340 | 1.10000 | 0.1147200000  | 1  |
| 13.221300 | -9.636520 | 4.295600  | 1.10000 | 0.0853470000  | 1  |
| 14.746800 | -10.47440 | 4.802700  | 1.10000 | 0.1204800000  | 1  |
| 11.862300 | -14.50300 | -3.500800 | 1.10000 | 0.0965310000  | 1  |
| 11.143900 | -14.80320 | -1.724900 | 1.10000 | 0.0981120000  | 1  |
| 9.517720  | -6.877500 | -1.003400 | 1.10000 | 0.0870150000  | 1  |
| 9.928620  | -5.227030 | -0.818020 | 1.10000 | 0.1153900000  | 1  |
| 6.268940  | -9.951830 | -1.378100 | 1.10000 | 0.0896280000  | 1  |
| 5.471890  | -11.12420 | -2.434700 | 1.10000 | 0.1114300000  | 1  |
| 16.116600 | -8.751150 | 3.428800  | 1.10000 | 0.1133100000  | 1  |
| 14.521800 | -8.083460 | 2.840400  | 1.10000 | 0.1041400000  | 1  |
| 9.123390  | -13.55270 | -2.496500 | 1.10000 | 0.0995120000  | 1  |
| 10.002700 | -13.27150 | -4.151300 | 1.10000 | 0.1055000000  | 1  |
| 12.225600 | -5.565500 | -1.941500 | 1.10000 | 0.1108900000  | 1  |
| 11.901600 | -7.228790 | -2.125000 | 1.10000 | 0.1070500000  | 1  |
| 3.378360  | -10.84320 | -1.225400 | 1.10000 | 0.1103500000  | 1  |
| 4.114730  | -9.997920 | 0.169100  | 1.10000 | 0.0977480000  | 1  |
| 13.842600 | -7.568550 | 5.141500  | 1.10000 | 0.0717050000  | 1  |
| 15.358000 | -8.180100 | 5.733700  | 1.10000 | 0.0835220000  | 1  |
| 10.205600 | -15.79060 | -4.313200 | 1.10000 | 0.0885920000  | 1  |
| 8.923840  | -15.92940 | -2.962300 | 1.10000 | 0.0835240000  | 1  |
| 10.044300 | -5.057890 | -3.241900 | 1.10000 | 0.0606510000  | 1  |
| 11.477200 | -5.657910 | -4.117500 | 1.10000 | 0.1094600000  | 1  |
| 3.081560  | -8.349610 | -1.193400 | 1.10000 | 0.1012300000  | 1  |
| 4.852850  | -8.017090 | -1.308000 | 1.10000 | 0.0558290000  | 1  |
| 15.595000 | -5.821340 | 5.573700  | 1.10000 | 0.0943790000  | 1  |
| 16.797200 | -6.735330 | 4.545600  | 1.10000 | 0.1046000000  | 1  |
| 8.543400  | -14.51560 | -5.659200 | 1.10000 | 0.0966740000  | 1  |
| 7.698230  | -15.95470 | -5.265700 | 1.10000 | 0.0952930000  | 1  |
| 8.831840  | -7.016810 | -3.217000 | 1.10000 | 0.0821630000  | 1  |
| 9.369240  | -6.645240 | -4.838200 | 1.10000 | 0.0878050000  | 1  |
| 4.940770  | -9.270810 | -3.599200 | 1.10000 | 0.1059900000  | 1  |
| 3.095530  | -9.234420 | -3.515000 | 1.10000 | 0.0880460000  | 1  |
| 16.124000 | -4.707400 | 3.328400  | 1.10000 | 0.1052200000  | 1  |
| 15.689000 | -6.149530 | 2.498200  | 1.10000 | 0.0978580000  | 1  |

|           |           |           |         |              |   |
|-----------|-----------|-----------|---------|--------------|---|
| 6.937660  | -14.61340 | -3.104400 | 1.10000 | 0.0826530000 | 1 |
| 7.237950  | -13.25270 | -4.203200 | 1.10000 | 0.0901030000 | 1 |
| 11.172100 | -8.411990 | -4.628300 | 1.10000 | 0.0991210000 | 1 |
| 10.702600 | -8.741500 | -2.922900 | 1.10000 | 0.0953380000 | 1 |
| 3.024550  | -6.797370 | -3.476200 | 1.10000 | 0.0706920000 | 1 |
| 4.871240  | -6.634150 | -3.379900 | 1.10000 | 0.1052800000 | 1 |
| 13.875100 | -4.526660 | 2.272000  | 1.10000 | 0.1086500000 | 1 |
| 13.341400 | -5.910300 | 3.316200  | 1.10000 | 0.0725830000 | 1 |
| 5.760840  | -14.12390 | -6.034100 | 1.10000 | 0.0979530000 | 1 |
| 5.349820  | -15.50810 | -4.969600 | 1.10000 | 0.0964140000 | 1 |
| 8.982000  | -9.188080 | -5.631300 | 1.10000 | 0.0936640000 | 1 |
| 9.770160  | -10.54180 | -4.658100 | 1.10000 | 0.1067300000 | 1 |
| 5.065120  | -7.877500 | -5.507000 | 1.10000 | 0.1174000000 | 1 |
| 3.175510  | -7.807480 | -5.665000 | 1.10000 | 0.1035200000 | 1 |
| 4.219250  | -6.269720 | -5.652100 | 1.10000 | 0.1053800000 | 1 |
| 13.729100 | -4.358380 | 5.412200  | 1.10000 | 0.0910840000 | 1 |
| 14.349000 | -3.113640 | 4.228700  | 1.10000 | 0.1194800000 | 1 |
| 12.558500 | -3.594780 | 4.242700  | 1.10000 | 0.1038000000 | 1 |
| 4.453570  | -13.77350 | -3.261400 | 1.10000 | 0.1010000000 | 1 |
| 4.806080  | -12.54510 | -4.442800 | 1.10000 | 0.1025200000 | 1 |
| 3.553490  | -13.81550 | -4.745300 | 1.10000 | 0.1101200000 | 1 |
| 7.387430  | -8.610670 | -3.642500 | 1.10000 | 0.0866880000 | 1 |
| 7.391480  | -10.38940 | -4.086700 | 1.10000 | 0.1143100000 | 1 |
| 8.289870  | -9.738930 | -2.699100 | 1.00000 | 0.1054300000 | 1 |

TAA\_multiTemperature\_candidate2.xlsx - Sheet #5

| x         | y         | z         | Radius  | Charge        | Atom |    |
|-----------|-----------|-----------|---------|---------------|------|----|
| 10.382200 | -9.897360 | 0.184320  | 1.55000 | -0.4542700000 |      | 14 |
| 9.252000  | -10.14430 | 1.212100  | 1.70000 | -0.0589730000 | 1    | 12 |
| 11.647400 | -9.844170 | 1.101500  | 1.70000 | -0.0552500000 |      | 12 |
| 10.460500 | -11.00790 | -0.841630 | 1.70000 | -0.0556390000 | 578  | 12 |
| 10.185600 | -8.606510 | -0.575470 | 1.70000 | -0.0567740000 |      | 12 |
| 7.865600  | -10.21190 | 0.526100  | 1.70000 | -0.2182700000 |      | 12 |
| 13.027900 | -10.06060 | 0.410100  | 1.70000 | -0.2176800000 |      | 12 |
| 10.570200 | -12.42680 | -0.284990 | 1.70000 | -0.2216600000 |      | 12 |
| 11.355700 | -8.073320 | -1.378400 | 1.70000 | -0.2160500000 |      | 12 |
| 6.889570  | -10.18370 | 1.738400  | 1.70000 | -0.1899600000 |      | 12 |
| 14.182600 | -10.29990 | 1.422400  | 1.70000 | -0.1972700000 |      | 12 |
| 10.570700 | -13.54520 | -1.344400 | 1.70000 | -0.1854500000 |      | 12 |
| 11.078800 | -6.721530 | -2.180500 | 1.70000 | -0.2032200000 |      | 12 |
| 5.464400  | -9.827250 | 1.308200  | 1.70000 | -0.1936200000 |      | 12 |
| 14.315500 | -9.177440 | 2.480200  | 1.70000 | -0.1970300000 |      | 12 |
| 10.328000 | -14.97320 | -0.918080 | 1.70000 | -0.1868500000 |      | 12 |
| 10.131700 | -6.970420 | -3.439800 | 1.70000 | -0.1978400000 |      | 12 |
| 5.379860  | -8.376760 | 0.737330  | 1.70000 | -0.1839800000 |      | 12 |
| 14.635200 | -7.730270 | 1.988100  | 1.70000 | -0.1744700000 |      | 12 |
| 10.043800 | -15.94810 | -2.083500 | 1.70000 | -0.1788700000 |      | 12 |
| 10.605600 | -8.030850 | -4.418100 | 1.70000 | -0.1826500000 |      | 12 |
| 5.579790  | -7.137810 | 1.699400  | 1.70000 | -0.1842200000 |      | 12 |
| 14.438900 | -6.652040 | 3.053700  | 1.70000 | -0.1865100000 |      | 12 |
| 9.752810  | -17.36900 | -1.725800 | 1.70000 | -0.1801600000 |      | 12 |
| 9.742260  | -8.131330 | -5.702200 | 1.70000 | -0.1812300000 |      | 12 |
| 7.018270  | -6.457820 | 1.708000  | 1.70000 | -0.1815900000 |      | 12 |
| 14.591600 | -5.228400 | 2.479500  | 1.70000 | -0.1845900000 |      | 12 |
| 9.309330  | -18.18020 | -2.989700 | 1.70000 | -0.1801500000 |      | 12 |
| 8.244310  | -8.444980 | -5.478000 | 1.70000 | -0.1788200000 |      | 12 |
| 7.097480  | -5.559460 | 0.426430  | 1.70000 | -0.1710600000 |      | 12 |
| 13.679100 | -4.891790 | 1.290300  | 1.70000 | -0.1771600000 |      | 12 |
| 7.828520  | -17.89630 | -3.390300 | 1.70000 | -0.1657700000 |      | 12 |
| 8.047070  | -9.674890 | -4.576800 | 1.70000 | -0.1743400000 |      | 12 |
| 8.319970  | -4.595300 | 0.385650  | 1.70000 | -0.1773500000 |      | 12 |
| 12.176600 | -4.998900 | 1.610200  | 1.70000 | -0.1776300000 |      | 12 |
| 7.298660  | -18.66410 | -4.622000 | 1.70000 | -0.1759200000 |      | 12 |
| 6.556730  | -10.06590 | -4.435300 | 1.70000 | -0.1795700000 |      | 12 |
| 8.504460  | -3.861030 | -0.968350 | 1.70000 | -0.3212300000 |      | 12 |
| 11.715600 | -4.261010 | 2.903800  | 1.70000 | -0.3203100000 |      | 12 |
| 8.013930  | -18.31300 | -5.891700 | 1.70000 | -0.3193800000 |      | 12 |
| 5.814650  | -9.190270 | -3.463600 | 1.70000 | -0.3167000000 |      | 12 |
| 9.346040  | -11.15660 | 1.796300  | 1.10000 | 0.1479700000  |      | 1  |
| 9.238440  | -9.392800 | 1.992400  | 1.10000 | 0.1495100000  |      | 1  |
| 11.557800 | -8.929020 | 1.715800  | 1.10000 | 0.1505000000  |      | 1  |
| 11.570700 | -10.67060 | 1.832600  | 1.10000 | 0.1472700000  |      | 1  |
| 9.507330  | -11.03330 | -1.401900 | 1.10000 | 0.1522800000  |      | 1  |
| 11.356700 | -10.85590 | -1.558800 | 1.10000 | 0.1546800000  |      | 1  |
| 9.234980  | -8.691090 | -1.214400 | 1.10000 | 0.1482100000  |      | 1  |
| 9.863960  | -7.814230 | 0.136140  | 1.10000 | 0.1480000000  |      | 1  |
| 7.753650  | -9.302520 | -0.106640 | 1.10000 | 0.1293200000  |      | 1  |
| 7.668350  | -11.04930 | -0.144920 | 1.10000 | 0.1239400000  |      | 1  |

|           |           |           |         |              |   |
|-----------|-----------|-----------|---------|--------------|---|
| 13.099300 | -10.96370 | -0.262930 | 1.10000 | 0.1189100000 | 1 |
| 13.425600 | -9.210870 | -0.253030 | 1.10000 | 0.1336000000 | 1 |
| 11.459700 | -12.45100 | 0.329370  | 1.10000 | 0.1230800000 | 1 |
| 9.667690  | -12.53490 | 0.362860  | 1.10000 | 0.1218200000 | 1 |
| 12.059200 | -7.782910 | -0.549270 | 1.10000 | 0.1207300000 | 1 |
| 11.859000 | -8.742270 | -2.140600 | 1.10000 | 0.1315300000 | 1 |
| 6.841580  | -11.20760 | 2.163800  | 1.10000 | 0.1061000000 | 1 |
| 7.052690  | -9.419800 | 2.472400  | 1.10000 | 0.1156300000 | 1 |
| 14.106400 | -11.31400 | 1.958300  | 1.10000 | 0.1062500000 | 1 |
| 15.145600 | -10.24330 | 0.837810  | 1.10000 | 0.1230300000 | 1 |
| 9.880680  | -13.25690 | -2.160800 | 1.10000 | 0.1108700000 | 1 |
| 11.566000 | -13.50140 | -1.793700 | 1.10000 | 0.1074700000 | 1 |
| 10.646000 | -5.928380 | -1.571300 | 1.10000 | 0.1098800000 | 1 |
| 12.046100 | -6.490300 | -2.699800 | 1.10000 | 0.1232900000 | 1 |
| 5.138470  | -10.65660 | 0.591570  | 1.10000 | 0.0959780000 | 1 |
| 4.729170  | -9.943040 | 2.177200  | 1.10000 | 0.1147200000 | 1 |
| 13.474500 | -9.156610 | 3.101500  | 1.10000 | 0.0853470000 | 1 |
| 15.217200 | -9.471090 | 3.019800  | 1.10000 | 0.1204800000 | 1 |
| 11.247900 | -15.35220 | -0.263560 | 1.10000 | 0.0965310000 | 1 |
| 9.476510  | -14.92940 | -0.177870 | 1.10000 | 0.0981120000 | 1 |
| 9.185020  | -7.367550 | -3.026300 | 1.10000 | 0.0870150000 | 1 |
| 9.976890  | -6.006570 | -4.010700 | 1.10000 | 0.1153900000 | 1 |
| 5.960850  | -8.236920 | -0.174970 | 1.10000 | 0.0896280000 | 1 |
| 4.315100  | -8.389310 | 0.313550  | 1.10000 | 0.1114300000 | 1 |
| 15.689100 | -7.588820 | 1.582900  | 1.10000 | 0.1133100000 | 1 |
| 13.867100 | -7.515980 | 1.154600  | 1.10000 | 0.1041400000 | 1 |
| 9.253610  | -15.47600 | -2.691500 | 1.10000 | 0.0995120000 | 1 |
| 10.748300 | -15.99080 | -2.864200 | 1.10000 | 0.1055000000 | 1 |
| 11.658900 | -7.903130 | -4.730500 | 1.10000 | 0.1108900000 | 1 |
| 10.559100 | -9.024680 | -3.881600 | 1.10000 | 0.1070500000 | 1 |
| 4.787590  | -6.339830 | 1.512900  | 1.10000 | 0.1103500000 | 1 |
| 5.374520  | -7.443480 | 2.832600  | 1.10000 | 0.0977480000 | 1 |
| 13.535200 | -6.835280 | 3.637400  | 1.10000 | 0.0717050000 | 1 |
| 15.095600 | -6.892080 | 3.878700  | 1.10000 | 0.0835220000 | 1 |
| 10.594600 | -17.83720 | -1.158600 | 1.10000 | 0.0885920000 | 1 |
| 8.917670  | -17.40720 | -1.013600 | 1.10000 | 0.0835240000 | 1 |
| 9.771050  | -7.159980 | -6.320500 | 1.10000 | 0.0606510000 | 1 |
| 10.182400 | -8.931990 | -6.363500 | 1.10000 | 0.1094600000 | 1 |
| 7.218700  | -5.774560 | 2.595900  | 1.10000 | 0.1012300000 | 1 |
| 7.816910  | -7.240860 | 1.668400  | 1.10000 | 0.0558290000 | 1 |
| 14.387700 | -4.563370 | 3.357600  | 1.10000 | 0.0943790000 | 1 |
| 15.681000 | -5.039710 | 2.135100  | 1.10000 | 0.1046000000 | 1 |
| 10.098800 | -18.00420 | -3.726100 | 1.10000 | 0.0966740000 | 1 |
| 9.404760  | -19.29040 | -2.735200 | 1.10000 | 0.0952930000 | 1 |
| 7.672670  | -7.610700 | -4.965200 | 1.10000 | 0.0821630000 | 1 |
| 7.748310  | -8.559610 | -6.476800 | 1.10000 | 0.0878050000 | 1 |
| 7.145160  | -6.202380 | -0.514980 | 1.10000 | 0.1059900000 | 1 |
| 6.222900  | -4.902020 | 0.255130  | 1.10000 | 0.0880460000 | 1 |
| 14.061800 | -3.882880 | 1.016000  | 1.10000 | 0.1052200000 | 1 |
| 13.967300 | -5.516810 | 0.369700  | 1.10000 | 0.0978580000 | 1 |
| 7.201090  | -18.15540 | -2.506700 | 1.10000 | 0.0826530000 | 1 |
| 7.590290  | -16.80640 | -3.508200 | 1.10000 | 0.0901030000 | 1 |
| 8.654870  | -10.52270 | -5.002800 | 1.10000 | 0.0991210000 | 1 |
| 8.497800  | -9.694130 | -3.602800 | 1.10000 | 0.0953380000 | 1 |
| 8.225760  | -3.848920 | 1.220300  | 1.10000 | 0.0706920000 | 1 |
| 9.260560  | -5.116140 | 0.668860  | 1.10000 | 0.1052800000 | 1 |
| 11.560600 | -4.666380 | 0.669830  | 1.10000 | 0.1086500000 | 1 |
| 11.877000 | -6.050250 | 1.640300  | 1.10000 | 0.0725830000 | 1 |
| 7.531810  | -19.73090 | -4.442500 | 1.10000 | 0.0979530000 | 1 |
| 6.234290  | -18.54130 | -4.776900 | 1.10000 | 0.0964140000 | 1 |
| 6.040630  | -10.08800 | -5.409000 | 1.10000 | 0.0936640000 | 1 |
| 6.552840  | -11.13800 | -4.020100 | 1.10000 | 0.1067300000 | 1 |
| 8.377160  | -4.533750 | -1.824500 | 1.10000 | 0.1174000000 | 1 |
| 7.766300  | -3.026190 | -1.064600 | 1.10000 | 0.1035200000 | 1 |
| 9.556040  | -3.382820 | -1.009500 | 1.10000 | 0.1053800000 | 1 |
| 12.219900 | -4.721550 | 3.814300  | 1.10000 | 0.0910840000 | 1 |
| 12.060700 | -3.237940 | 2.832700  | 1.10000 | 0.1194800000 | 1 |
| 10.558200 | -4.337370 | 3.105400  | 1.10000 | 0.1038000000 | 1 |
| 7.705150  | -17.33640 | -6.308200 | 1.10000 | 0.1010000000 | 1 |
| 9.124820  | -18.26040 | -5.793300 | 1.10000 | 0.1025200000 | 1 |
| 7.680180  | -19.04050 | -6.792700 | 1.10000 | 0.1101200000 | 1 |
| 5.838580  | -8.091080 | -3.693100 | 1.10000 | 0.0866880000 | 1 |
| 4.715000  | -9.434660 | -3.334000 | 1.10000 | 0.1143100000 | 1 |
| 6.262350  | -9.207130 | -2.421900 | 1.00000 | 0.1054300000 | 1 |

TAA\_multiTemperature\_candidate2.xlsx - Sheet #6

| x         | y         | z        | Radius  | Charge        | Atom |    |
|-----------|-----------|----------|---------|---------------|------|----|
| 10.432000 | -10.06510 | 0.967150 | 1.55000 | -0.4542700000 |      | 14 |

|           |           |           |         |               |     |    |
|-----------|-----------|-----------|---------|---------------|-----|----|
| 9.449080  | -10.60150 | 2.022100  | 1.70000 | -0.0589730000 | 1   | 12 |
| 11.772600 | -10.11660 | 1.689300  | 1.70000 | -0.0552500000 |     | 12 |
| 10.427300 | -10.87300 | -0.328560 | 1.70000 | -0.0556390000 | 578 | 12 |
| 9.980290  | -8.622850 | 0.687640  | 1.70000 | -0.0567740000 |     | 12 |
| 8.004600  | -10.86870 | 1.484400  | 1.70000 | -0.2182700000 |     | 12 |
| 12.984600 | -9.825390 | 0.875900  | 1.70000 | -0.2176800000 |     | 12 |
| 10.566500 | -12.35450 | -0.040873 | 1.70000 | -0.2216600000 |     | 12 |
| 10.819700 | -7.677840 | -0.290050 | 1.70000 | -0.2160500000 |     | 12 |
| 6.964540  | -10.29950 | 2.469800  | 1.70000 | -0.1899600000 |     | 12 |
| 14.280000 | -9.845400 | 1.695300  | 1.70000 | -0.1972700000 |     | 12 |
| 10.600100 | -13.10030 | -1.342900 | 1.70000 | -0.1854500000 |     | 12 |
| 9.891280  | -6.695500 | -1.016500 | 1.70000 | -0.2032200000 |     | 12 |
| 5.463660  | -10.53210 | 2.115700  | 1.70000 | -0.1936200000 |     | 12 |
| 14.509600 | -8.794420 | 2.837800  | 1.70000 | -0.1970300000 |     | 12 |
| 10.726100 | -14.62100 | -1.087500 | 1.70000 | -0.1868500000 |     | 12 |
| 9.022000  | -7.286150 | -2.089100 | 1.70000 | -0.1978400000 |     | 12 |
| 5.056360  | -9.897250 | 0.764750  | 1.70000 | -0.1839800000 |     | 12 |
| 15.264400 | -7.559030 | 2.318100  | 1.70000 | -0.1744700000 |     | 12 |
| 10.692800 | -15.53420 | -2.340200 | 1.70000 | -0.1788700000 |     | 12 |
| 9.850540  | -7.611710 | -3.362800 | 1.70000 | -0.1826500000 |     | 12 |
| 5.425020  | -8.373680 | 0.648810  | 1.70000 | -0.1842200000 |     | 12 |
| 15.239200 | -6.417270 | 3.355000  | 1.70000 | -0.1865100000 |     | 12 |
| 9.283270  | -16.07180 | -2.598800 | 1.70000 | -0.1801600000 |     | 12 |
| 8.837870  | -7.913930 | -4.531700 | 1.70000 | -0.1812300000 |     | 12 |
| 4.953910  | -7.743030 | -0.694050 | 1.70000 | -0.1815900000 |     | 12 |
| 15.934500 | -5.119440 | 3.022400  | 1.70000 | -0.1845900000 |     | 12 |
| 9.068650  | -16.85260 | -3.928200 | 1.70000 | -0.1801500000 |     | 12 |
| 7.840190  | -9.082270 | -4.337600 | 1.70000 | -0.1788200000 |     | 12 |
| 5.342670  | -6.268010 | -0.912330 | 1.70000 | -0.1710600000 |     | 12 |
| 15.419700 | -4.629520 | 1.639100  | 1.70000 | -0.1771600000 |     | 12 |
| 9.035790  | -16.02610 | -5.227100 | 1.70000 | -0.1657700000 |     | 12 |
| 8.419360  | -10.46570 | -3.969100 | 1.70000 | -0.1743400000 |     | 12 |
| 4.954270  | -5.719640 | -2.273300 | 1.70000 | -0.1773500000 |     | 12 |
| 13.934400 | -4.306670 | 1.530300  | 1.70000 | -0.1776300000 |     | 12 |
| 9.227360  | -16.95190 | -6.423200 | 1.70000 | -0.1759200000 |     | 12 |
| 7.487520  | -11.66820 | -4.196800 | 1.70000 | -0.1795700000 |     | 12 |
| 5.432560  | -4.260760 | -2.405900 | 1.70000 | -0.3212300000 |     | 12 |
| 13.643700 | -3.137490 | 2.488400  | 1.70000 | -0.3203100000 |     | 12 |
| 9.549710  | -16.15050 | -7.738600 | 1.70000 | -0.3193800000 |     | 12 |
| 6.253840  | -11.76700 | -3.291000 | 1.70000 | -0.3167000000 |     | 12 |
| 9.833730  | -11.51570 | 2.549100  | 1.10000 | 0.1479700000  |     | 1  |
| 9.412770  | -9.825570 | 2.877500  | 1.10000 | 0.1495100000  |     | 1  |
| 11.751600 | -9.425800 | 2.551600  | 1.10000 | 0.1505000000  |     | 1  |
| 11.946100 | -11.09240 | 2.175500  | 1.10000 | 0.1472700000  |     | 1  |
| 9.523230  | -10.69540 | -0.927980 | 1.10000 | 0.1522800000  |     | 1  |
| 11.197700 | -10.50420 | -1.046700 | 1.10000 | 0.1546800000  |     | 1  |
| 8.961100  | -8.603300 | 0.241910  | 1.10000 | 0.1482100000  |     | 1  |
| 9.861490  | -8.094620 | 1.652500  | 1.10000 | 0.1480000000  |     | 1  |
| 7.872960  | -10.37530 | 0.491400  | 1.10000 | 0.1293200000  |     | 1  |
| 7.809230  | -11.96590 | 1.297200  | 1.10000 | 0.1239400000  |     | 1  |
| 13.085800 | -10.53770 | 0.028933  | 1.10000 | 0.1189100000  |     | 1  |
| 12.921600 | -8.790240 | 0.444900  | 1.10000 | 0.1336000000  |     | 1  |
| 11.486700 | -12.60290 | 0.509210  | 1.10000 | 0.1230800000  |     | 1  |
| 9.712240  | -12.74690 | 0.588390  | 1.10000 | 0.1218200000  |     | 1  |
| 11.635000 | -7.162350 | 0.241500  | 1.10000 | 0.1207300000  |     | 1  |
| 11.236900 | -8.333380 | -1.062200 | 1.10000 | 0.1315300000  |     | 1  |
| 7.125380  | -10.80430 | 3.489800  | 1.10000 | 0.1061000000  |     | 1  |
| 7.156780  | -9.172650 | 2.511700  | 1.10000 | 0.1156300000  |     | 1  |
| 14.352400 | -10.84670 | 2.109000  | 1.10000 | 0.1062500000  |     | 1  |
| 15.144700 | -9.767300 | 0.973080  | 1.10000 | 0.1230300000  |     | 1  |
| 9.703510  | -12.84810 | -1.967300 | 1.10000 | 0.1108700000  |     | 1  |
| 11.471900 | -12.78300 | -1.971700 | 1.10000 | 0.1074700000  |     | 1  |
| 9.236620  | -6.193420 | -0.263010 | 1.10000 | 0.1098800000  |     | 1  |
| 10.484700 | -5.863770 | -1.504600 | 1.10000 | 0.1232900000  |     | 1  |
| 5.237090  | -11.64360 | 2.153600  | 1.10000 | 0.0959780000  |     | 1  |
| 4.844950  | -10.03170 | 2.894700  | 1.10000 | 0.1147200000  |     | 1  |
| 13.562800 | -8.505770 | 3.312300  | 1.10000 | 0.0853470000  |     | 1  |
| 15.071500 | -9.271760 | 3.704900  | 1.10000 | 0.1204800000  |     | 1  |
| 11.682400 | -14.75370 | -0.508230 | 1.10000 | 0.0965310000  |     | 1  |
| 9.886230  | -14.90430 | -0.405300 | 1.10000 | 0.0981120000  |     | 1  |
| 8.591540  | -8.184200 | -1.659000 | 1.10000 | 0.0870150000  |     | 1  |
| 8.171270  | -6.563810 | -2.343100 | 1.10000 | 0.1153900000  |     | 1  |
| 5.586380  | -10.38260 | -0.093393 | 1.10000 | 0.0896280000  |     | 1  |
| 3.961490  | -10.02060 | 0.558250  | 1.10000 | 0.1114300000  |     | 1  |
| 16.306900 | -7.812090 | 1.954700  | 1.10000 | 0.1133100000  |     | 1  |
| 14.765100 | -7.248830 | 1.398500  | 1.10000 | 0.1041400000  |     | 1  |
| 11.202800 | -14.99320 | -3.182900 | 1.10000 | 0.0995120000  |     | 1  |
| 11.388100 | -16.38980 | -2.135600 | 1.10000 | 0.1055000000  |     | 1  |
| 10.476200 | -6.769550 | -3.695100 | 1.10000 | 0.1108900000  |     | 1  |
| 10.605300 | -8.460630 | -3.194900 | 1.10000 | 0.1070500000  |     | 1  |

|           |           |           |         |              |   |
|-----------|-----------|-----------|---------|--------------|---|
| 4.930770  | -7.805990 | 1.486300  | 1.10000 | 0.1103500000 | 1 |
| 6.505160  | -8.174070 | 0.636660  | 1.10000 | 0.0977480000 | 1 |
| 14.208200 | -6.188150 | 3.687900  | 1.10000 | 0.0717050000 | 1 |
| 15.795800 | -6.829330 | 4.221200  | 1.10000 | 0.0835220000 | 1 |
| 9.011900  | -16.75970 | -1.793000 | 1.10000 | 0.0885920000 | 1 |
| 8.546320  | -15.23860 | -2.556800 | 1.10000 | 0.0835240000 | 1 |
| 8.304630  | -6.922980 | -4.681800 | 1.10000 | 0.0606510000 | 1 |
| 9.455500  | -8.047310 | -5.450600 | 1.10000 | 0.1094600000 | 1 |
| 5.285360  | -8.378100 | -1.575300 | 1.10000 | 0.1012300000 | 1 |
| 3.880460  | -7.814910 | -0.616760 | 1.10000 | 0.0558290000 | 1 |
| 15.831600 | -4.311690 | 3.770700  | 1.10000 | 0.0943790000 | 1 |
| 17.024400 | -5.263690 | 2.910700  | 1.10000 | 0.1046000000 | 1 |
| 9.937070  | -17.59240 | -3.910600 | 1.10000 | 0.0966740000 | 1 |
| 8.127440  | -17.44550 | -3.821000 | 1.10000 | 0.0952930000 | 1 |
| 7.081660  | -8.873770 | -3.512000 | 1.10000 | 0.0821630000 | 1 |
| 7.188960  | -9.189950 | -5.258000 | 1.10000 | 0.0878050000 | 1 |
| 4.857030  | -5.685330 | -0.119020 | 1.10000 | 0.1059900000 | 1 |
| 6.456350  | -6.291310 | -0.730230 | 1.10000 | 0.0880460000 | 1 |
| 15.939100 | -3.654150 | 1.307600  | 1.10000 | 0.1052200000 | 1 |
| 15.641800 | -5.334030 | 0.831630  | 1.10000 | 0.0978580000 | 1 |
| 8.036260  | -15.50240 | -5.374400 | 1.10000 | 0.0826530000 | 1 |
| 9.848790  | -15.21150 | -5.161800 | 1.10000 | 0.0901030000 | 1 |
| 9.302920  | -10.63130 | -4.576600 | 1.10000 | 0.0991210000 | 1 |
| 8.755820  | -10.40760 | -2.869500 | 1.10000 | 0.0953380000 | 1 |
| 5.443860  | -6.248000 | -3.111900 | 1.10000 | 0.0706920000 | 1 |
| 3.852440  | -5.813490 | -2.427800 | 1.10000 | 0.1052800000 | 1 |
| 13.661800 | -4.017570 | 0.484780  | 1.10000 | 0.1086500000 | 1 |
| 13.315000 | -5.184830 | 1.810400  | 1.10000 | 0.0725830000 | 1 |
| 10.083000 | -17.61620 | -6.199500 | 1.10000 | 0.0979530000 | 1 |
| 8.285040  | -17.50240 | -6.520200 | 1.10000 | 0.0964140000 | 1 |
| 7.160880  | -11.73290 | -5.260300 | 1.10000 | 0.0936640000 | 1 |
| 8.087010  | -12.59470 | -3.985300 | 1.10000 | 0.1067300000 | 1 |
| 4.701860  | -3.621690 | -1.865900 | 1.10000 | 0.1174000000 | 1 |
| 6.447930  | -4.082790 | -1.968000 | 1.10000 | 0.1035200000 | 1 |
| 5.347790  | -3.887460 | -3.462400 | 1.10000 | 0.1053800000 | 1 |
| 13.691200 | -3.506300 | 3.537200  | 1.10000 | 0.0910840000 | 1 |
| 14.401200 | -2.377970 | 2.303600  | 1.10000 | 0.1194800000 | 1 |
| 12.630600 | -2.709670 | 2.331200  | 1.10000 | 0.1038000000 | 1 |
| 8.757640  | -15.33990 | -7.820700 | 1.10000 | 0.1010000000 | 1 |
| 10.558600 | -15.69390 | -7.599400 | 1.10000 | 0.1025200000 | 1 |
| 9.551600  | -16.77640 | -8.678800 | 1.10000 | 0.1101200000 | 1 |
| 5.504490  | -11.00190 | -3.579700 | 1.10000 | 0.0866880000 | 1 |
| 5.750430  | -12.76370 | -3.372900 | 1.10000 | 0.1143100000 | 1 |
| 6.408590  | -11.59640 | -2.201500 | 1.00000 | 0.1054300000 | 1 |

IMoS.cla

-----  
 excelfile Savefile Gas  
 /filefolder/TAA\_multiTemperature\_candidate2.xlsx /savefolder/TDA\_SI2.txt N2

DNRCustomRange 0 0  
 interface 0  
 fromvalue 4  
 tovalue 6  
 red\_coef 1.01  
 Charge 1  
 radgas 1.5  
 Mgas 28  
 Pressure 101325  
 Mweight 578  
 Temperature 295  
 Polarizability 1.7  
 NrotationsPA 500  
 NrotationsEHSS 3  
 NrotationsTM 3  
 NgastotalEHSS 300000  
 NgastotalTM 300000  
 Accommodation 0  
 Timestep 100  
 Boxdomain 16  
 Diffuse? 1  
 reemvel 1  
 Other 0  
 Simplify 0  
 PA 0  
 PATSA 0  
 EHSS/DHSS 0  
 TM 0  
 TDHSS 0

qpol 0  
LennardJones 1  
DTM 0  
HEN 4  
TeffRange 295 296 297 298.5 300 302 305 308 312 315 320 325 330 340 350 365 380 420 470 530 600 680 770 870 980 1100  
EsEc 1  
ft\_vector 0.33333 0.28885 0.90371 0.90371 0.28885 -0.33333 -0.49486 -0.36437 -0.36437 -0.49486 -0.33333  
t\_vector 0 0.1 0.2 0.3 0.4 0.5 0.6 0.7 0.8 0.9 1  
MultiT 1  
MultiTval 295  
seed 13  
Numthreads 15  
Repeatseed 1  
DragRG 1

1. V. D. Gandhi, K. Short, L. Hua, I. Rodríguez, C. Larriba-Andaluz, A numerical tool to calculate ion mobility at arbitrary fields from all-atom models. *Journal of Aerosol Science*, 106122 (2022).
2. V. D. Gandhi, C. Larriba-Andaluz, Predicting ion mobility as a function of the electric field for small ions in light gases. *Analytica Chimica Acta* **1184**, 339019 (2021).
